# Supplementary material for: Genome-wide identification and comparison of differentially expressed profiles of miRNAs and lncRNAs with associated ceRNA networks in the gonads of Chinese soft-shelled turtle, Pelodiscus sinensis
Source: BMC Genomics. 2020 Jun 29;21:443. doi: 10.1186/s12864-020-06826-1 (PMC7322844; doi:10.1186/s12864-020-06826-1)
Supplement: Supplementary file 1 — Additional file 1 The results of reads mapped to the genome of Pelodiscus sinensis. [file 12864_2020_6826_MOESM1_ESM.xlsx]

## Sheet: Sheet1
Sample ID	Total Reads	Mapped Reads	Uniq Mapped Reads	Multiple Mapped Reads	Reads Map to '+'	Reads Map to '-'
Ovary 1	168018734	144796573(86.18%)	139116371(82.80%)	5680202(3.38%)	71914756(42.80%)	72222779(42.98%)
Ovary 2	200813584	176154318(87.72%)	169233957(84.27%)	6920361(3.45%)	87620915(43.63%)	87934353(43.79%)
Ovary 3	180986670	157588142(87.07%)	151806027(83.88%)	5782115(3.19%)	78329843(43.28%)	78614466(43.44%)
Testis 1	170876334	145266338(85.01%)	140036551(81.95%)	5229787(3.06%)	71930817(42.10%)	72328996(42.33%)
Testis 2	108912552	92587649(85.01%)	89481917(82.16%)	3105732(2.85%)	45958275(42.20%)	46035732(42.27%)
Testis 3	198170706	167271845(84.41%)	161108080(81.30%)	6163765(3.11%)	82935073(41.85%)	83227387(42.00%)
