# Supplementary material for: Genome-wide identification and comparison of differentially expressed profiles of miRNAs and lncRNAs with associated ceRNA networks in the gonads of Chinese soft-shelled turtle, Pelodiscus sinensis
Source: BMC Genomics. 2020 Jun 29;21:443. doi: 10.1186/s12864-020-06826-1 (PMC7322844; doi:10.1186/s12864-020-06826-1)
Supplement: Supplementary file 11 — Additional file 11 KEGG pathway analysis of DElncRNAs in cis [file 12864_2020_6826_MOESM11_ESM.xlsx]

## Sheet: Sheet1
KEGG pathway	Genes
HTLV-I infection	ENSPSIG00000010550
Thyroid hormone synthesis	ENSPSIG00000017390
Chemokine signaling pathway	ENSPSIG00000012649;ENSPSIG00000016506
Drug metabolism - other enzymes	ENSPSIG00000002749;ENSPSIG00000004051;ENSPSIG00000006354;ENSPSIG00000007820;ENSPSIG00000014769;ENSPSIG00000016619
Glutamatergic synapse	ENSPSIG00000010550;ENSPSIG00000017390
Cell cycle	ENSPSIG00000000212;ENSPSIG00000002502;ENSPSIG00000003703;ENSPSIG00000004134;ENSPSIG00000004991;ENSPSIG00000005969;ENSPSIG00000006283;ENSPSIG00000007040;ENSPSIG00000008291;ENSPSIG00000008301;ENSPSIG00000008375;ENSPSIG00000008715;ENSPSIG00000008830;ENSPSIG00000009510;ENSPSIG00000009614;ENSPSIG00000009788;ENSPSIG00000010079;ENSPSIG00000010545;ENSPSIG00000010718;ENSPSIG00000011820;ENSPSIG00000012258;…
Pancreatic cancer	ENSPSIG00000012649;ENSPSIG00000017626
Serotonergic synapse	ENSPSIG00000017390
Long-term potentiation	ENSPSIG00000010550;ENSPSIG00000015563;ENSPSIG00000016506;ENSPSIG00000017390
PI3K-Akt signaling pathway	ENSPSIG00000004984;ENSPSIG00000009269;ENSPSIG00000012649;ENSPSIG00000014269
T cell receptor signaling pathway	ENSPSIG00000010550
Jak-STAT signaling pathway	ENSPSIG00000000599;ENSPSIG00000004597;ENSPSIG00000005880;ENSPSIG00000006087;ENSPSIG00000006602;ENSPSIG00000007898;ENSPSIG00000008301;ENSPSIG00000009762;ENSPSIG00000009831;ENSPSIG00000009956;ENSPSIG00000009973;ENSPSIG00000010392;ENSPSIG00000010485;ENSPSIG00000010986;ENSPSIG00000011564;ENSPSIG00000012446;ENSPSIG00000012993;ENSPSIG00000013150;ENSPSIG00000015602;ENSPSIG00000015877;ENSPSIG00000016088;…
Sulfur metabolism	ENSPSIG00000005954;ENSPSIG00000006252;ENSPSIG00000006485;ENSPSIG00000009096;ENSPSIG00000010261;ENSPSIG00000017925;ENSPSIG00000017994
Citrate cycle (TCA cycle)	ENSPSIG00000005492;ENSPSIG00000006459;ENSPSIG00000007398;ENSPSIG00000007650;ENSPSIG00000010603;ENSPSIG00000016157;ENSPSIG00000017022
B cell receptor signaling pathway	ENSPSIG00000010550;ENSPSIG00000012649
Glycolysis / Gluconeogenesis	ENSPSIG00000002611;ENSPSIG00000004197;ENSPSIG00000005492;ENSPSIG00000006459;ENSPSIG00000007398;ENSPSIG00000007505;ENSPSIG00000007593;ENSPSIG00000008621;ENSPSIG00000009623;ENSPSIG00000009652;ENSPSIG00000009907;ENSPSIG00000010528;ENSPSIG00000010603;ENSPSIG00000011429;ENSPSIG00000012860;ENSPSIG00000013373;ENSPSIG00000014038;ENSPSIG00000014175;ENSPSIG00000015047;ENSPSIG00000015260;ENSPSIG00000015706
Cyanoamino acid metabolism	ENSPSIG00000010418
Amyotrophic lateral sclerosis (ALS)	ENSPSIG00000010550;ENSPSIG00000012649
Circadian entrainment	ENSPSIG00000015563
Degradation of aromatic compounds	ENSPSIG00000010528
Insulin signaling pathway	ENSPSIG00000000599;ENSPSIG00000001657;ENSPSIG00000002289;ENSPSIG00000003132;ENSPSIG00000003218;ENSPSIG00000003498;ENSPSIG00000003819;ENSPSIG00000004597;ENSPSIG00000005304;ENSPSIG00000005719;ENSPSIG00000006087;ENSPSIG00000006805;ENSPSIG00000009553;ENSPSIG00000010208;ENSPSIG00000010518;ENSPSIG00000010603;ENSPSIG00000010986;ENSPSIG00000011053;ENSPSIG00000012662;ENSPSIG00000013223;ENSPSIG00000015563;…
Selenocompound metabolism	ENSPSIG00000002338;ENSPSIG00000006187;ENSPSIG00000006485;ENSPSIG00000007047;ENSPSIG00000007956;ENSPSIG00000009096;ENSPSIG00000009657;ENSPSIG00000013094;ENSPSIG00000015980
MAPK signaling pathway	ENSPSIG00000000106;ENSPSIG00000002757;ENSPSIG00000002944;ENSPSIG00000003132;ENSPSIG00000003218;ENSPSIG00000003819;ENSPSIG00000005267;ENSPSIG00000005304;ENSPSIG00000005528;ENSPSIG00000005891;ENSPSIG00000005965;ENSPSIG00000006091;ENSPSIG00000006400;ENSPSIG00000006440;ENSPSIG00000008254;ENSPSIG00000008301;ENSPSIG00000009228;ENSPSIG00000009455;ENSPSIG00000009592;ENSPSIG00000009674;ENSPSIG00000009815;…
FoxO signaling pathway	ENSPSIG00000002028;ENSPSIG00000002835;ENSPSIG00000003218;ENSPSIG00000003730;ENSPSIG00000003819;ENSPSIG00000004050;ENSPSIG00000004597;ENSPSIG00000005304;ENSPSIG00000005814;ENSPSIG00000005965;ENSPSIG00000006087;ENSPSIG00000007060;ENSPSIG00000007418;ENSPSIG00000008132;ENSPSIG00000008375;ENSPSIG00000009973;ENSPSIG00000010545;ENSPSIG00000010603;ENSPSIG00000010718;ENSPSIG00000012258;ENSPSIG00000012662;…
Metabolism of xenobiotics by cytochrome P450	ENSPSIG00000002749;ENSPSIG00000005021;ENSPSIG00000007496;ENSPSIG00000009623;ENSPSIG00000014175;ENSPSIG00000015003;ENSPSIG00000015167;ENSPSIG00000015195;ENSPSIG00000015623;ENSPSIG00000017403
Lysine degradation	ENSPSIG00000004150;ENSPSIG00000005027;ENSPSIG00000007473;ENSPSIG00000008527;ENSPSIG00000008563;ENSPSIG00000011107;ENSPSIG00000012491;ENSPSIG00000014475;ENSPSIG00000015047;ENSPSIG00000016997;ENSPSIG00000017022;ENSPSIG00000017734
SNARE interactions in vesicular transport	ENSPSIG00000005056;ENSPSIG00000005809;ENSPSIG00000006697;ENSPSIG00000008412;ENSPSIG00000011813;ENSPSIG00000015981
Phenylalanine, tyrosine and tryptophan biosynthesis	ENSPSIG00000005685;ENSPSIG00000012379
Homologous recombination	ENSPSIG00000002980;ENSPSIG00000007029;ENSPSIG00000007756;ENSPSIG00000013330
Protein processing in endoplasmic reticulum	ENSPSIG00000002121;ENSPSIG00000002636;ENSPSIG00000002743;ENSPSIG00000003007;ENSPSIG00000003009;ENSPSIG00000004594;ENSPSIG00000004800;ENSPSIG00000004991;ENSPSIG00000005104;ENSPSIG00000005346;ENSPSIG00000005367;ENSPSIG00000005450;ENSPSIG00000005732;ENSPSIG00000005957;ENSPSIG00000006076;ENSPSIG00000006095;ENSPSIG00000006639;ENSPSIG00000006672;ENSPSIG00000007502;ENSPSIG00000007526;ENSPSIG00000007858;…
Primary bile acid biosynthesis	ENSPSIG00000000687;ENSPSIG00000004936;ENSPSIG00000008497;ENSPSIG00000014650
Adrenergic signaling in cardiomyocytes	ENSPSIG00000000825;ENSPSIG00000002188;ENSPSIG00000003218;ENSPSIG00000004461;ENSPSIG00000004597;ENSPSIG00000004984;ENSPSIG00000005719;ENSPSIG00000006087;ENSPSIG00000006461;ENSPSIG00000007546;ENSPSIG00000007680;ENSPSIG00000008646;ENSPSIG00000009061;ENSPSIG00000009113;ENSPSIG00000010518;ENSPSIG00000010658;ENSPSIG00000011085;ENSPSIG00000011602;ENSPSIG00000011758;ENSPSIG00000011775;ENSPSIG00000013223;…
Purine metabolism	ENSPSIG00000002092;ENSPSIG00000002328;ENSPSIG00000002870;ENSPSIG00000002895;ENSPSIG00000003274;ENSPSIG00000003343;ENSPSIG00000003870;ENSPSIG00000004395;ENSPSIG00000005131;ENSPSIG00000005780;ENSPSIG00000005991;ENSPSIG00000006021;ENSPSIG00000006354;ENSPSIG00000006485;ENSPSIG00000006898;ENSPSIG00000007264;ENSPSIG00000007617;ENSPSIG00000007820;ENSPSIG00000007893;ENSPSIG00000008162;ENSPSIG00000008284;…
Fructose and mannose metabolism	ENSPSIG00000004197;ENSPSIG00000005636;ENSPSIG00000007577;ENSPSIG00000008621;ENSPSIG00000008638;ENSPSIG00000010337;ENSPSIG00000012223;ENSPSIG00000013373;ENSPSIG00000013592;ENSPSIG00000015260
Herpes simplex infection	ENSPSIG00000000529;ENSPSIG00000000537;ENSPSIG00000002283;ENSPSIG00000002719;ENSPSIG00000002944;ENSPSIG00000003480;ENSPSIG00000003812;ENSPSIG00000004990;ENSPSIG00000004991;ENSPSIG00000005304;ENSPSIG00000005345;ENSPSIG00000005528;ENSPSIG00000005890;ENSPSIG00000005965;ENSPSIG00000006185;ENSPSIG00000006364;ENSPSIG00000006829;ENSPSIG00000007148;ENSPSIG00000007474;ENSPSIG00000007578;ENSPSIG00000007735;…
Hepatitis C	ENSPSIG00000004984
Base excision repair	ENSPSIG00000003331;ENSPSIG00000004491;ENSPSIG00000007439;ENSPSIG00000008879;ENSPSIG00000009786;ENSPSIG00000010238;ENSPSIG00000012155;ENSPSIG00000014160;ENSPSIG00000016374
Non-homologous end-joining	ENSPSIG00000007844;ENSPSIG00000008759
Dopaminergic synapse	ENSPSIG00000004984;ENSPSIG00000015563;ENSPSIG00000017390
Nucleotide excision repair	ENSPSIG00000002597;ENSPSIG00000006675;ENSPSIG00000010079;ENSPSIG00000011350;ENSPSIG00000013229;ENSPSIG00000013275;ENSPSIG00000015286;ENSPSIG00000017396;ENSPSIG00000017443
Renal cell carcinoma	ENSPSIG00000012649;ENSPSIG00000016506
ABC transporters	ENSPSIG00000002723;ENSPSIG00000005929;ENSPSIG00000007351;ENSPSIG00000007730;ENSPSIG00000010250;ENSPSIG00000011483;ENSPSIG00000015471;ENSPSIG00000016190
Cysteine and methionine metabolism	ENSPSIG00000002611;ENSPSIG00000005685;ENSPSIG00000005954;ENSPSIG00000006252;ENSPSIG00000006504;ENSPSIG00000006670;ENSPSIG00000007505;ENSPSIG00000013094;ENSPSIG00000016157;ENSPSIG00000017239
Pentose and glucuronate interconversions	ENSPSIG00000002749;ENSPSIG00000005636;ENSPSIG00000007318;ENSPSIG00000007326;ENSPSIG00000010528;ENSPSIG00000013592;ENSPSIG00000015047
Steroid biosynthesis	ENSPSIG00000003279;ENSPSIG00000003344;ENSPSIG00000003401;ENSPSIG00000003855;ENSPSIG00000005113;ENSPSIG00000008241;ENSPSIG00000010939;ENSPSIG00000011291;ENSPSIG00000015924;ENSPSIG00000016888
Basal transcription factors	ENSPSIG00000002283;ENSPSIG00000002597;ENSPSIG00000002719;ENSPSIG00000004990;ENSPSIG00000005345;ENSPSIG00000006675;ENSPSIG00000006931;ENSPSIG00000007557;ENSPSIG00000010079;ENSPSIG00000010865;ENSPSIG00000014222;ENSPSIG00000014538;ENSPSIG00000015334;ENSPSIG00000017396;ENSPSIG00000017561
Folate biosynthesis	ENSPSIG00000001288;ENSPSIG00000003830;ENSPSIG00000008636
Tuberculosis	ENSPSIG00000010550;ENSPSIG00000015563
Peroxisome	ENSPSIG00000000016;ENSPSIG00000004674;ENSPSIG00000005021;ENSPSIG00000005751;ENSPSIG00000007418;ENSPSIG00000008142;ENSPSIG00000008497;ENSPSIG00000009355;ENSPSIG00000010419;ENSPSIG00000011483;ENSPSIG00000012713;ENSPSIG00000012846;ENSPSIG00000013982;ENSPSIG00000014650;ENSPSIG00000014758;ENSPSIG00000015828;ENSPSIG00000015860;ENSPSIG00000015885;ENSPSIG00000016190;ENSPSIG00000016410;ENSPSIG00000017378;…
Proteasome	ENSPSIG00000003280;ENSPSIG00000005319;ENSPSIG00000006226;ENSPSIG00000007470;ENSPSIG00000009480;ENSPSIG00000014079;ENSPSIG00000014226;ENSPSIG00000015807;ENSPSIG00000016135;ENSPSIG00000017910
mRNA surveillance pathway	ENSPSIG00000002760;ENSPSIG00000002879;ENSPSIG00000003118;ENSPSIG00000003482;ENSPSIG00000003719;ENSPSIG00000004203;ENSPSIG00000004971;ENSPSIG00000004984;ENSPSIG00000005468;ENSPSIG00000006185;ENSPSIG00000006289;ENSPSIG00000006737;ENSPSIG00000008535;ENSPSIG00000009558;ENSPSIG00000011959;ENSPSIG00000012201;ENSPSIG00000012406;ENSPSIG00000012545;ENSPSIG00000013119;ENSPSIG00000013331;ENSPSIG00000013663;…
cAMP signaling pathway	ENSPSIG00000012649;ENSPSIG00000015563;ENSPSIG00000016506
Focal adhesion	ENSPSIG00000001325;ENSPSIG00000003218;ENSPSIG00000003498;ENSPSIG00000003526;ENSPSIG00000003826;ENSPSIG00000004513;ENSPSIG00000004597;ENSPSIG00000004844;ENSPSIG00000005447;ENSPSIG00000005662;ENSPSIG00000005666;ENSPSIG00000005706;ENSPSIG00000006087;ENSPSIG00000006133;ENSPSIG00000006462;ENSPSIG00000006653;ENSPSIG00000006949;ENSPSIG00000006995;ENSPSIG00000007167;ENSPSIG00000008577;ENSPSIG00000009246;…
Ubiquitin mediated proteolysis	ENSPSIG00000000599;ENSPSIG00000002238;ENSPSIG00000002636;ENSPSIG00000003696;ENSPSIG00000003701;ENSPSIG00000004899;ENSPSIG00000004991;ENSPSIG00000005068;ENSPSIG00000006095;ENSPSIG00000006290;ENSPSIG00000006669;ENSPSIG00000007384;ENSPSIG00000007497;ENSPSIG00000007502;ENSPSIG00000007898;ENSPSIG00000008375;ENSPSIG00000008889;ENSPSIG00000011820;ENSPSIG00000012902;ENSPSIG00000013275;ENSPSIG00000015343;…
Lysosome	ENSPSIG00000002641;ENSPSIG00000002800;ENSPSIG00000003735;ENSPSIG00000004207;ENSPSIG00000005690;ENSPSIG00000006730;ENSPSIG00000006792;ENSPSIG00000006801;ENSPSIG00000007415;ENSPSIG00000007599;ENSPSIG00000007711;ENSPSIG00000008276;ENSPSIG00000008377;ENSPSIG00000009243;ENSPSIG00000009626;ENSPSIG00000009883;ENSPSIG00000010477;ENSPSIG00000010879;ENSPSIG00000011367;ENSPSIG00000011641;ENSPSIG00000012278;…
mTOR signaling pathway	ENSPSIG00000002835;ENSPSIG00000003218;ENSPSIG00000004140;ENSPSIG00000004597;ENSPSIG00000005304;ENSPSIG00000006087;ENSPSIG00000010208;ENSPSIG00000012621;ENSPSIG00000012662;ENSPSIG00000013976;ENSPSIG00000015566;ENSPSIG00000017723
Renin-angiotensin system	ENSPSIG00000000825;ENSPSIG00000002631;ENSPSIG00000004735;ENSPSIG00000010434;ENSPSIG00000011367
RNA degradation	ENSPSIG00000001910;ENSPSIG00000003403;ENSPSIG00000003719;ENSPSIG00000003865;ENSPSIG00000004197;ENSPSIG00000009211;ENSPSIG00000009652;ENSPSIG00000012358;ENSPSIG00000012706;ENSPSIG00000012860;ENSPSIG00000013036;ENSPSIG00000014210;ENSPSIG00000014666;ENSPSIG00000014790;ENSPSIG00000015260;ENSPSIG00000015720;ENSPSIG00000016020;ENSPSIG00000016206;ENSPSIG00000016241;ENSPSIG00000016892;ENSPSIG00000017054
Calcium signaling pathway	ENSPSIG00000000512;ENSPSIG00000000825;ENSPSIG00000001869;ENSPSIG00000002099;ENSPSIG00000002606;ENSPSIG00000002609;ENSPSIG00000004854;ENSPSIG00000005719;ENSPSIG00000006396;ENSPSIG00000006653;ENSPSIG00000006867;ENSPSIG00000007226;ENSPSIG00000008962;ENSPSIG00000010004;ENSPSIG00000010518;ENSPSIG00000010550;ENSPSIG00000010658;ENSPSIG00000010786;ENSPSIG00000011775;ENSPSIG00000012271;ENSPSIG00000013223;…
Huntington's disease	ENSPSIG00000017108
Hippo signaling pathway	ENSPSIG00000004984;ENSPSIG00000010875
Synthesis and degradation of ketone bodies	ENSPSIG00000018229
GnRH signaling pathway	ENSPSIG00000002757;ENSPSIG00000003218;ENSPSIG00000003819;ENSPSIG00000005719;ENSPSIG00000006440;ENSPSIG00000010518;ENSPSIG00000010658;ENSPSIG00000011085;ENSPSIG00000012267;ENSPSIG00000013223;ENSPSIG00000013808;ENSPSIG00000014289;ENSPSIG00000014324;ENSPSIG00000014875;ENSPSIG00000015217;ENSPSIG00000015563;ENSPSIG00000015702;ENSPSIG00000016027;ENSPSIG00000017390;ENSPSIG00000017522
Natural killer cell mediated cytotoxicity	ENSPSIG00000010550;ENSPSIG00000012649
Terpenoid backbone biosynthesis	ENSPSIG00000004674;ENSPSIG00000008679;ENSPSIG00000009679;ENSPSIG00000010365;ENSPSIG00000018229
Galactose metabolism	ENSPSIG00000004197;ENSPSIG00000005636;ENSPSIG00000009641;ENSPSIG00000015260
Glycerophospholipid metabolism	ENSPSIG00000002207;ENSPSIG00000002757;ENSPSIG00000002786;ENSPSIG00000003262;ENSPSIG00000003509;ENSPSIG00000003562;ENSPSIG00000004304;ENSPSIG00000004306;ENSPSIG00000004806;ENSPSIG00000008753;ENSPSIG00000008966;ENSPSIG00000009855;ENSPSIG00000010704;ENSPSIG00000010922;ENSPSIG00000013989;ENSPSIG00000014360;ENSPSIG00000014570;ENSPSIG00000014596;ENSPSIG00000015834;ENSPSIG00000016361;ENSPSIG00000016939;…
Oxidative phosphorylation	ENSPSIG00000001991;ENSPSIG00000002783;ENSPSIG00000003329;ENSPSIG00000003413;ENSPSIG00000003860;ENSPSIG00000004452;ENSPSIG00000004805;ENSPSIG00000005018;ENSPSIG00000005192;ENSPSIG00000005690;ENSPSIG00000005879;ENSPSIG00000006172;ENSPSIG00000006558;ENSPSIG00000007677;ENSPSIG00000009568;ENSPSIG00000014224;ENSPSIG00000014230;ENSPSIG00000014343;ENSPSIG00000014683;ENSPSIG00000016999;ENSPSIG00000017193;…
Fatty acid degradation	ENSPSIG00000002108;ENSPSIG00000005335;ENSPSIG00000008049;ENSPSIG00000008142;ENSPSIG00000009623;ENSPSIG00000012491;ENSPSIG00000012613;ENSPSIG00000013982;ENSPSIG00000014475;ENSPSIG00000015047;ENSPSIG00000015551;ENSPSIG00000015828;ENSPSIG00000017374;ENSPSIG00000017378
Cell adhesion molecules (CAMs)	ENSPSIG00000001820;ENSPSIG00000002185;ENSPSIG00000003251;ENSPSIG00000003812;ENSPSIG00000003818;ENSPSIG00000004672;ENSPSIG00000004844;ENSPSIG00000007492;ENSPSIG00000007578;ENSPSIG00000009196;ENSPSIG00000010268;ENSPSIG00000010840;ENSPSIG00000011008;ENSPSIG00000012194;ENSPSIG00000013739;ENSPSIG00000013759;ENSPSIG00000014138;ENSPSIG00000015933;ENSPSIG00000017549
Adipocytokine signaling pathway	ENSPSIG00000002108;ENSPSIG00000002835;ENSPSIG00000002944;ENSPSIG00000005304;ENSPSIG00000005965;ENSPSIG00000010603;ENSPSIG00000010811;ENSPSIG00000012363;ENSPSIG00000012662;ENSPSIG00000015702;ENSPSIG00000015828;ENSPSIG00000016027;ENSPSIG00000017378;ENSPSIG00000018007
Alzheimer's disease	ENSPSIG00000010550;ENSPSIG00000015563;ENSPSIG00000017390
NOD-like receptor signaling pathway	ENSPSIG00000002944;ENSPSIG00000003218;ENSPSIG00000005304;ENSPSIG00000005965;ENSPSIG00000008575;ENSPSIG00000008892;ENSPSIG00000008903;ENSPSIG00000009109;ENSPSIG00000009228;ENSPSIG00000009846;ENSPSIG00000009973;ENSPSIG00000010825;ENSPSIG00000011927;ENSPSIG00000013808;ENSPSIG00000014289;ENSPSIG00000015702;ENSPSIG00000016027;ENSPSIG00000017706
Arrhythmogenic right ventricular cardiomyopathy (ARVC)	ENSPSIG00000010875
Fatty acid elongation	ENSPSIG00000005335;ENSPSIG00000009852;ENSPSIG00000010193;ENSPSIG00000011151;ENSPSIG00000014003;ENSPSIG00000014475;ENSPSIG00000017049;ENSPSIG00000017287;ENSPSIG00000017736
Retinol metabolism	ENSPSIG00000002749;ENSPSIG00000005815;ENSPSIG00000007496;ENSPSIG00000008206;ENSPSIG00000009623;ENSPSIG00000009676;ENSPSIG00000013313;ENSPSIG00000014851;ENSPSIG00000016438;ENSPSIG00000017810;ENSPSIG00000017898;ENSPSIG00000018142
p53 signaling pathway	ENSPSIG00000000212;ENSPSIG00000001821;ENSPSIG00000004513;ENSPSIG00000005528;ENSPSIG00000008405;ENSPSIG00000008774;ENSPSIG00000009363;ENSPSIG00000010545;ENSPSIG00000012258;ENSPSIG00000013007;ENSPSIG00000013387;ENSPSIG00000013922;ENSPSIG00000015946;ENSPSIG00000016537;ENSPSIG00000016761;ENSPSIG00000016817;ENSPSIG00000016955;ENSPSIG00000017925
Other types of O-glycan biosynthesis	ENSPSIG00000002650;ENSPSIG00000004004;ENSPSIG00000006600;ENSPSIG00000007083;ENSPSIG00000008077;ENSPSIG00000009641;ENSPSIG00000011729;ENSPSIG00000016997
Hedgehog signaling pathway	ENSPSIG00000003397;ENSPSIG00000003656;ENSPSIG00000004050;ENSPSIG00000005580;ENSPSIG00000006958;ENSPSIG00000006970;ENSPSIG00000007055;ENSPSIG00000009182;ENSPSIG00000011911;ENSPSIG00000013223;ENSPSIG00000016979;ENSPSIG00000017336
VEGF signaling pathway	ENSPSIG00000002609;ENSPSIG00000002757;ENSPSIG00000003218;ENSPSIG00000003498;ENSPSIG00000003819;ENSPSIG00000004597;ENSPSIG00000006087;ENSPSIG00000009768;ENSPSIG00000010550;ENSPSIG00000012649;ENSPSIG00000013808;ENSPSIG00000013976;ENSPSIG00000014289;ENSPSIG00000016102
Ras signaling pathway	ENSPSIG00000012649;ENSPSIG00000015563;ENSPSIG00000016506;ENSPSIG00000017626
Dorso-ventral axis formation	ENSPSIG00000003218;ENSPSIG00000009213;ENSPSIG00000010572
ErbB signaling pathway	ENSPSIG00000003218;ENSPSIG00000003490;ENSPSIG00000003498;ENSPSIG00000003819;ENSPSIG00000004597;ENSPSIG00000006087;ENSPSIG00000006653;ENSPSIG00000007040;ENSPSIG00000008301;ENSPSIG00000008602;ENSPSIG00000008683;ENSPSIG00000010503;ENSPSIG00000014875;ENSPSIG00000015639;ENSPSIG00000015702;ENSPSIG00000016027
Tight junction	ENSPSIG00000001325;ENSPSIG00000002185;ENSPSIG00000003819;ENSPSIG00000004984;ENSPSIG00000005662;ENSPSIG00000005666;ENSPSIG00000005674;ENSPSIG00000006213;ENSPSIG00000006514;ENSPSIG00000006829;ENSPSIG00000007167;ENSPSIG00000007537;ENSPSIG00000008577;ENSPSIG00000009592;ENSPSIG00000009898;ENSPSIG00000010875;ENSPSIG00000011032;ENSPSIG00000012194;ENSPSIG00000012845;ENSPSIG00000015164;ENSPSIG00000015328;…
Lipoic acid metabolism	ENSPSIG00000001039;ENSPSIG00000008083
Bacterial invasion of epithelial cells	ENSPSIG00000010875;ENSPSIG00000012649
Fanconi anemia pathway	ENSPSIG00000001880;ENSPSIG00000002980;ENSPSIG00000004103;ENSPSIG00000007202;ENSPSIG00000011060;ENSPSIG00000012646;ENSPSIG00000013040;ENSPSIG00000013330;ENSPSIG00000013597;ENSPSIG00000014816;ENSPSIG00000016138;ENSPSIG00000018247
Pancreatic secretion	ENSPSIG00000012649;ENSPSIG00000016506;ENSPSIG00000017390
Fc gamma R-mediated phagocytosis	ENSPSIG00000012649
Notch signaling pathway	ENSPSIG00000004134;ENSPSIG00000006468;ENSPSIG00000008077;ENSPSIG00000008520;ENSPSIG00000008737;ENSPSIG00000009573;ENSPSIG00000009582;ENSPSIG00000009659;ENSPSIG00000010459;ENSPSIG00000010572;ENSPSIG00000011669;ENSPSIG00000013040;ENSPSIG00000014017;ENSPSIG00000014232;ENSPSIG00000014816;ENSPSIG00000017347;ENSPSIG00000017557
Pyruvate metabolism	ENSPSIG00000002611;ENSPSIG00000003253;ENSPSIG00000005492;ENSPSIG00000006459;ENSPSIG00000007398;ENSPSIG00000007505;ENSPSIG00000010603;ENSPSIG00000014038;ENSPSIG00000015047;ENSPSIG00000015649;ENSPSIG00000015706;ENSPSIG00000015770;ENSPSIG00000015897;ENSPSIG00000016157;ENSPSIG00000017500
Ether lipid metabolism	ENSPSIG00000002757;ENSPSIG00000003509;ENSPSIG00000004304;ENSPSIG00000004306;ENSPSIG00000009612;ENSPSIG00000014360;ENSPSIG00000016673;ENSPSIG00000016939;ENSPSIG00000017713
Glycosphingolipid biosynthesis - globo series	ENSPSIG00000001335;ENSPSIG00000004566;ENSPSIG00000012278;ENSPSIG00000012654;ENSPSIG00000013355;ENSPSIG00000014027
Amphetamine addiction	ENSPSIG00000010550;ENSPSIG00000015563
D-Glutamine and D-glutamate metabolism	ENSPSIG00000010077
Glycosaminoglycan biosynthesis - keratan sulfate	ENSPSIG00000001211;ENSPSIG00000002650;ENSPSIG00000002675;ENSPSIG00000003111;ENSPSIG00000004566;ENSPSIG00000009641
Neurotrophin signaling pathway	ENSPSIG00000012649;ENSPSIG00000015563;ENSPSIG00000016506
Inositol phosphate metabolism	ENSPSIG00000002289;ENSPSIG00000004274;ENSPSIG00000004597;ENSPSIG00000005118;ENSPSIG00000006087;ENSPSIG00000007562;ENSPSIG00000008962;ENSPSIG00000009907;ENSPSIG00000010746;ENSPSIG00000011053;ENSPSIG00000013373;ENSPSIG00000014713;ENSPSIG00000015217;ENSPSIG00000017994
Legionellosis	ENSPSIG00000003189;ENSPSIG00000009767
AMPK signaling pathway	ENSPSIG00000003919;ENSPSIG00000004984
Tyrosine metabolism	ENSPSIG00000005685;ENSPSIG00000009623;ENSPSIG00000014175;ENSPSIG00000014322;ENSPSIG00000015202;ENSPSIG00000015725;ENSPSIG00000018142
Pantothenate and CoA biosynthesis	ENSPSIG00000006021;ENSPSIG00000006898;ENSPSIG00000010634;ENSPSIG00000011955;ENSPSIG00000012757
Choline metabolism in cancer	ENSPSIG00000012649
Ascorbate and aldarate metabolism	ENSPSIG00000002749;ENSPSIG00000007318;ENSPSIG00000015047
Protein export	ENSPSIG00000005450;ENSPSIG00000005732;ENSPSIG00000009649;ENSPSIG00000009693;ENSPSIG00000013611;ENSPSIG00000014020;ENSPSIG00000014842;ENSPSIG00000016345
Glycerolipid metabolism	ENSPSIG00000003509;ENSPSIG00000005431;ENSPSIG00000005636;ENSPSIG00000008206;ENSPSIG00000008753;ENSPSIG00000008966;ENSPSIG00000009819;ENSPSIG00000010528;ENSPSIG00000010653;ENSPSIG00000010922;ENSPSIG00000011474;ENSPSIG00000013665;ENSPSIG00000014520;ENSPSIG00000014570;ENSPSIG00000015047;ENSPSIG00000015834
Oxytocin signaling pathway	ENSPSIG00000010550;ENSPSIG00000010875;ENSPSIG00000015563;ENSPSIG00000017390
Olfactory transduction	ENSPSIG00000015563
Arachidonic acid metabolism	ENSPSIG00000002757;ENSPSIG00000003333;ENSPSIG00000004304;ENSPSIG00000004306;ENSPSIG00000005605;ENSPSIG00000006117;ENSPSIG00000009177;ENSPSIG00000009768;ENSPSIG00000014360;ENSPSIG00000015319;ENSPSIG00000015795;ENSPSIG00000016322;ENSPSIG00000016939;ENSPSIG00000017403;ENSPSIG00000017553
Axon guidance	ENSPSIG00000010550;ENSPSIG00000012649
Glycosphingolipid biosynthesis - lacto and neolacto series	ENSPSIG00000001211;ENSPSIG00000002650;ENSPSIG00000002675;ENSPSIG00000003111;ENSPSIG00000003808;ENSPSIG00000003814;ENSPSIG00000005003;ENSPSIG00000009641;ENSPSIG00000014766
N-Glycan biosynthesis	ENSPSIG00000001206;ENSPSIG00000002650;ENSPSIG00000003773;ENSPSIG00000005104;ENSPSIG00000006279;ENSPSIG00000006600;ENSPSIG00000007276;ENSPSIG00000007541;ENSPSIG00000009641;ENSPSIG00000011114;ENSPSIG00000011183;ENSPSIG00000012995;ENSPSIG00000015027;ENSPSIG00000015100;ENSPSIG00000015727;ENSPSIG00000015997;ENSPSIG00000016172;ENSPSIG00000016461;ENSPSIG00000018171
Linoleic acid metabolism	ENSPSIG00000002757;ENSPSIG00000004304;ENSPSIG00000004306;ENSPSIG00000014360;ENSPSIG00000015795;ENSPSIG00000016939
Dilated cardiomyopathy	ENSPSIG00000010875
Glycine, serine and threonine metabolism	ENSPSIG00000002778;ENSPSIG00000003253;ENSPSIG00000003859;ENSPSIG00000007398;ENSPSIG00000007593;ENSPSIG00000009982;ENSPSIG00000012801;ENSPSIG00000013094;ENSPSIG00000014322;ENSPSIG00000015202
beta-Alanine metabolism	ENSPSIG00000002335;ENSPSIG00000006504;ENSPSIG00000012329;ENSPSIG00000014175;ENSPSIG00000014475;ENSPSIG00000015047;ENSPSIG00000015860
Melanogenesis	ENSPSIG00000003218;ENSPSIG00000003397;ENSPSIG00000003656;ENSPSIG00000003819;ENSPSIG00000004461;ENSPSIG00000004481;ENSPSIG00000005504;ENSPSIG00000005719;ENSPSIG00000006461;ENSPSIG00000006970;ENSPSIG00000007055;ENSPSIG00000008226;ENSPSIG00000009182;ENSPSIG00000010126;ENSPSIG00000010518;ENSPSIG00000010658;ENSPSIG00000011911;ENSPSIG00000013223;ENSPSIG00000015217;ENSPSIG00000015563
Drug metabolism - cytochrome P450	ENSPSIG00000002749;ENSPSIG00000005021;ENSPSIG00000007618;ENSPSIG00000009623;ENSPSIG00000010321;ENSPSIG00000010535;ENSPSIG00000012162;ENSPSIG00000014175;ENSPSIG00000014322;ENSPSIG00000015167;ENSPSIG00000015195;ENSPSIG00000015202;ENSPSIG00000015623;ENSPSIG00000018142
Regulation of autophagy	ENSPSIG00000010882;ENSPSIG00000014104;ENSPSIG00000015566;ENSPSIG00000017272
2-Oxocarboxylic acid metabolism	ENSPSIG00000005685
Influenza A	ENSPSIG00000010875;ENSPSIG00000015702;ENSPSIG00000016027
Long-term depression	ENSPSIG00000004984;ENSPSIG00000017390
Oocyte meiosis	ENSPSIG00000000106;ENSPSIG00000003218;ENSPSIG00000003703;ENSPSIG00000004984;ENSPSIG00000004991;ENSPSIG00000005719;ENSPSIG00000005969;ENSPSIG00000006892;ENSPSIG00000009213;ENSPSIG00000009510;ENSPSIG00000010518;ENSPSIG00000010550;ENSPSIG00000010658;ENSPSIG00000012692;ENSPSIG00000013223;ENSPSIG00000013331;ENSPSIG00000014587;ENSPSIG00000015544;ENSPSIG00000015563;ENSPSIG00000017390;ENSPSIG00000017522;…
Ribosome biogenesis in eukaryotes	ENSPSIG00000000500;ENSPSIG00000004012;ENSPSIG00000006185;ENSPSIG00000006469;ENSPSIG00000006481;ENSPSIG00000006737;ENSPSIG00000006829;ENSPSIG00000007591;ENSPSIG00000007800;ENSPSIG00000007854;ENSPSIG00000009673;ENSPSIG00000009783;ENSPSIG00000009821;ENSPSIG00000011094;ENSPSIG00000011520;ENSPSIG00000011773;ENSPSIG00000012302;ENSPSIG00000012343;ENSPSIG00000012435;ENSPSIG00000012477;ENSPSIG00000013024;…
Butanoate metabolism	ENSPSIG00000002335;ENSPSIG00000012613;ENSPSIG00000014475;ENSPSIG00000018229
RNA polymerase	ENSPSIG00000002092;ENSPSIG00000002328;ENSPSIG00000002870;ENSPSIG00000003274;ENSPSIG00000004395;ENSPSIG00000008284;ENSPSIG00000010173;ENSPSIG00000010726;ENSPSIG00000011836;ENSPSIG00000012580;ENSPSIG00000013867;ENSPSIG00000013913;ENSPSIG00000016613;ENSPSIG00000017108
Salivary secretion	ENSPSIG00000015563;ENSPSIG00000017390
Amoebiasis	ENSPSIG00000014269
Riboflavin metabolism	ENSPSIG00000006021;ENSPSIG00000006898;ENSPSIG00000014307;ENSPSIG00000015951
Biosynthesis of amino acids	ENSPSIG00000003870;ENSPSIG00000004197;ENSPSIG00000005685;ENSPSIG00000006577;ENSPSIG00000006670;ENSPSIG00000008621;ENSPSIG00000009652;ENSPSIG00000010031;ENSPSIG00000012379;ENSPSIG00000012860;ENSPSIG00000013094;ENSPSIG00000013373;ENSPSIG00000015260;ENSPSIG00000017577
Alcoholism	ENSPSIG00000015563
Ribosome	ENSPSIG00000002093;ENSPSIG00000002110;ENSPSIG00000002477;ENSPSIG00000002750;ENSPSIG00000002908;ENSPSIG00000003131;ENSPSIG00000003295;ENSPSIG00000003457;ENSPSIG00000003917;ENSPSIG00000004065;ENSPSIG00000004333;ENSPSIG00000004818;ENSPSIG00000004952;ENSPSIG00000005116;ENSPSIG00000005516;ENSPSIG00000005589;ENSPSIG00000005938;ENSPSIG00000006759;ENSPSIG00000006821;ENSPSIG00000006901;ENSPSIG00000007217;…
DNA replication	ENSPSIG00000002224;ENSPSIG00000003343;ENSPSIG00000007756;ENSPSIG00000008830;ENSPSIG00000012039;ENSPSIG00000017443
Non-alcoholic fatty liver disease (NAFLD)	ENSPSIG00000012649
Colorectal cancer	ENSPSIG00000012649
Cytokine-cytokine receptor interaction	ENSPSIG00000003360;ENSPSIG00000004117;ENSPSIG00000004869;ENSPSIG00000005386;ENSPSIG00000005528;ENSPSIG00000005880;ENSPSIG00000006602;ENSPSIG00000008205;ENSPSIG00000008892;ENSPSIG00000008903;ENSPSIG00000009109;ENSPSIG00000009246;ENSPSIG00000009762;ENSPSIG00000009831;ENSPSIG00000009956;ENSPSIG00000009973;ENSPSIG00000010400;ENSPSIG00000010485;ENSPSIG00000010889;ENSPSIG00000011805;ENSPSIG00000012056;…
Pathways in cancer	ENSPSIG00000012649;ENSPSIG00000017626
Other glycan degradation	ENSPSIG00000007711;ENSPSIG00000008558;ENSPSIG00000012278;ENSPSIG00000012881;ENSPSIG00000013355
TGF-beta signaling pathway	ENSPSIG00000002456;ENSPSIG00000003218;ENSPSIG00000003731;ENSPSIG00000004513;ENSPSIG00000004984;ENSPSIG00000004991;ENSPSIG00000005580;ENSPSIG00000006343;ENSPSIG00000008301;ENSPSIG00000009614;ENSPSIG00000009658;ENSPSIG00000014614;ENSPSIG00000014895;ENSPSIG00000015328;ENSPSIG00000016125;ENSPSIG00000016169;ENSPSIG00000017002;ENSPSIG00000017653;ENSPSIG00000017783
Biosynthesis of unsaturated fatty acids	ENSPSIG00000005899;ENSPSIG00000006664;ENSPSIG00000008497;ENSPSIG00000009852;ENSPSIG00000010193;ENSPSIG00000013066;ENSPSIG00000013346;ENSPSIG00000013982;ENSPSIG00000017049;ENSPSIG00000017287;ENSPSIG00000017736
Viral myocarditis	ENSPSIG00000010875;ENSPSIG00000012649
Epstein-Barr virus infection	ENSPSIG00000017108
Retrograde endocannabinoid signaling	ENSPSIG00000017390
Cholinergic synapse	ENSPSIG00000017390
Amino sugar and nucleotide sugar metabolism	ENSPSIG00000005741;ENSPSIG00000006460;ENSPSIG00000007318;ENSPSIG00000008638;ENSPSIG00000010316;ENSPSIG00000010337;ENSPSIG00000011429;ENSPSIG00000012223;ENSPSIG00000012278;ENSPSIG00000013053;ENSPSIG00000013355;ENSPSIG00000017124
Glyoxylate and dicarboxylate metabolism	ENSPSIG00000003253;ENSPSIG00000003859;ENSPSIG00000004243;ENSPSIG00000007418;ENSPSIG00000016157;ENSPSIG00000017577;ENSPSIG00000017583
Valine, leucine and isoleucine degradation	ENSPSIG00000005335;ENSPSIG00000007398;ENSPSIG00000008049;ENSPSIG00000012095;ENSPSIG00000012116;ENSPSIG00000012329;ENSPSIG00000012613;ENSPSIG00000014475;ENSPSIG00000015047;ENSPSIG00000015440;ENSPSIG00000017510;ENSPSIG00000018142;ENSPSIG00000018229
Platelet activation	ENSPSIG00000010875;ENSPSIG00000014269;ENSPSIG00000016506;ENSPSIG00000017390
Pertussis	ENSPSIG00000015563
Biotin metabolism	ENSPSIG00000006624
Pentose phosphate pathway	ENSPSIG00000003870;ENSPSIG00000004197;ENSPSIG00000006315;ENSPSIG00000007727;ENSPSIG00000008621;ENSPSIG00000011429;ENSPSIG00000015260
Glycosaminoglycan degradation	ENSPSIG00000010879;ENSPSIG00000012278;ENSPSIG00000012376;ENSPSIG00000012923;ENSPSIG00000013355
Estrogen signaling pathway	ENSPSIG00000015563;ENSPSIG00000017390
Glycosaminoglycan biosynthesis - heparan sulfate / heparin	ENSPSIG00000000891;ENSPSIG00000001042;ENSPSIG00000001309;ENSPSIG00000001755;ENSPSIG00000004541;ENSPSIG00000006363;ENSPSIG00000015287;ENSPSIG00000018243
Spliceosome	ENSPSIG00000001262;ENSPSIG00000003011;ENSPSIG00000003158;ENSPSIG00000003405;ENSPSIG00000003480;ENSPSIG00000003768;ENSPSIG00000004273;ENSPSIG00000004505;ENSPSIG00000004522;ENSPSIG00000005241;ENSPSIG00000005253;ENSPSIG00000005607;ENSPSIG00000007497;ENSPSIG00000008535;ENSPSIG00000009384;ENSPSIG00000009558;ENSPSIG00000009565;ENSPSIG00000010022;ENSPSIG00000010459;ENSPSIG00000010867;ENSPSIG00000011199;…
Fatty acid metabolism	ENSPSIG00000002108;ENSPSIG00000005335;ENSPSIG00000005899;ENSPSIG00000006624;ENSPSIG00000006664;ENSPSIG00000008049;ENSPSIG00000011151;ENSPSIG00000012613;ENSPSIG00000013066;ENSPSIG00000013346;ENSPSIG00000013427;ENSPSIG00000013982;ENSPSIG00000014475;ENSPSIG00000015828;ENSPSIG00000017049;ENSPSIG00000017287;ENSPSIG00000017374;ENSPSIG00000017378;ENSPSIG00000017736
Mucin type O-Glycan biosynthesis	ENSPSIG00000000770;ENSPSIG00000000783;ENSPSIG00000003679;ENSPSIG00000004260;ENSPSIG00000004566;ENSPSIG00000007294;ENSPSIG00000016868
Nitrogen metabolism	ENSPSIG00000009752;ENSPSIG00000010077;ENSPSIG00000011174;ENSPSIG00000012543;ENSPSIG00000017577
Alanine, aspartate and glutamate metabolism	ENSPSIG00000002335;ENSPSIG00000003903;ENSPSIG00000005131;ENSPSIG00000005685;ENSPSIG00000006577;ENSPSIG00000009982;ENSPSIG00000010077;ENSPSIG00000012846;ENSPSIG00000017124;ENSPSIG00000017371;ENSPSIG00000017577
Nicotinate and nicotinamide metabolism	ENSPSIG00000004634;ENSPSIG00000005991;ENSPSIG00000006021;ENSPSIG00000006433;ENSPSIG00000006531;ENSPSIG00000006898;ENSPSIG00000007617;ENSPSIG00000009040;ENSPSIG00000011766;ENSPSIG00000014206;ENSPSIG00000016900;ENSPSIG00000017090;ENSPSIG00000018142
Rap1 signaling pathway	ENSPSIG00000010875;ENSPSIG00000012649;ENSPSIG00000015563;ENSPSIG00000016506;ENSPSIG00000017626
Vascular smooth muscle contraction	ENSPSIG00000000825;ENSPSIG00000002757;ENSPSIG00000003128;ENSPSIG00000003218;ENSPSIG00000005719;ENSPSIG00000006143;ENSPSIG00000010518;ENSPSIG00000010658;ENSPSIG00000010786;ENSPSIG00000013223;ENSPSIG00000014216;ENSPSIG00000014324;ENSPSIG00000014360;ENSPSIG00000015217;ENSPSIG00000015328;ENSPSIG00000015405;ENSPSIG00000015563;ENSPSIG00000016055;ENSPSIG00000016764;ENSPSIG00000016939;ENSPSIG00000017390;…
Phagosome	ENSPSIG00000000529;ENSPSIG00000000537;ENSPSIG00000001325;ENSPSIG00000002226;ENSPSIG00000002906;ENSPSIG00000002936;ENSPSIG00000003198;ENSPSIG00000003497;ENSPSIG00000003812;ENSPSIG00000004513;ENSPSIG00000005690;ENSPSIG00000005732;ENSPSIG00000006792;ENSPSIG00000006995;ENSPSIG00000007157;ENSPSIG00000007167;ENSPSIG00000007578;ENSPSIG00000008377;ENSPSIG00000008724;ENSPSIG00000009070;ENSPSIG00000009077;…
Progesterone-mediated oocyte maturation	ENSPSIG00000000106;ENSPSIG00000003218;ENSPSIG00000004597;ENSPSIG00000005969;ENSPSIG00000006087;ENSPSIG00000009213;ENSPSIG00000009510;ENSPSIG00000010545;ENSPSIG00000010658;ENSPSIG00000011820;ENSPSIG00000013223;ENSPSIG00000013808;ENSPSIG00000014289;ENSPSIG00000015702;ENSPSIG00000016027;ENSPSIG00000016550;ENSPSIG00000017706
Cardiac muscle contraction	ENSPSIG00000002188;ENSPSIG00000004452;ENSPSIG00000007546;ENSPSIG00000007680;ENSPSIG00000008646;ENSPSIG00000014224;ENSPSIG00000014343;ENSPSIG00000014683;ENSPSIG00000016388
Ubiquinone and other terpenoid-quinone biosynthesis	ENSPSIG00000002536;ENSPSIG00000004142;ENSPSIG00000012159;ENSPSIG00000014886;ENSPSIG00000015725
PPAR signaling pathway	ENSPSIG00000002108;ENSPSIG00000003317;ENSPSIG00000005751;ENSPSIG00000005889;ENSPSIG00000006664;ENSPSIG00000007657;ENSPSIG00000007962;ENSPSIG00000009486;ENSPSIG00000009819;ENSPSIG00000010603;ENSPSIG00000010811;ENSPSIG00000011100;ENSPSIG00000011996;ENSPSIG00000012746;ENSPSIG00000013346;ENSPSIG00000013982;ENSPSIG00000014465;ENSPSIG00000014520;ENSPSIG00000015828;ENSPSIG00000016132;ENSPSIG00000017374;…
Tryptophan metabolism	ENSPSIG00000004243;ENSPSIG00000007418;ENSPSIG00000007496;ENSPSIG00000008859;ENSPSIG00000012491;ENSPSIG00000014322;ENSPSIG00000014475;ENSPSIG00000015047;ENSPSIG00000015202;ENSPSIG00000018142
Protein digestion and absorption	ENSPSIG00000014269
Taurine and hypotaurine metabolism	ENSPSIG00000002335;ENSPSIG00000008497;ENSPSIG00000017239
Propanoate metabolism	ENSPSIG00000002611;ENSPSIG00000007505;ENSPSIG00000007650;ENSPSIG00000012329;ENSPSIG00000014038;ENSPSIG00000014475;ENSPSIG00000015706;ENSPSIG00000015860
Glycosaminoglycan biosynthesis - chondroitin sulfate / dermatan sulfate	ENSPSIG00000005573;ENSPSIG00000006363;ENSPSIG00000008289;ENSPSIG00000012585;ENSPSIG00000016845;ENSPSIG00000018243
Pyrimidine metabolism	ENSPSIG00000002092;ENSPSIG00000002328;ENSPSIG00000002338;ENSPSIG00000002870;ENSPSIG00000003274;ENSPSIG00000003343;ENSPSIG00000004051;ENSPSIG00000004395;ENSPSIG00000005991;ENSPSIG00000006187;ENSPSIG00000006354;ENSPSIG00000007047;ENSPSIG00000007582;ENSPSIG00000007617;ENSPSIG00000007893;ENSPSIG00000008284;ENSPSIG00000008907;ENSPSIG00000009363;ENSPSIG00000010159;ENSPSIG00000010173;ENSPSIG00000010680;…
Porphyrin and chlorophyll metabolism	ENSPSIG00000002749;ENSPSIG00000003810;ENSPSIG00000005571;ENSPSIG00000007023;ENSPSIG00000008878;ENSPSIG00000012667;ENSPSIG00000015112;ENSPSIG00000015628;ENSPSIG00000018103
Viral carcinogenesis	ENSPSIG00000012649
Vitamin B6 metabolism	ENSPSIG00000008160;ENSPSIG00000018142
Glioma	ENSPSIG00000015563
cGMP-PKG signaling pathway	ENSPSIG00000010550;ENSPSIG00000015563;ENSPSIG00000017390
Gap junction	ENSPSIG00000002906;ENSPSIG00000002936;ENSPSIG00000003218;ENSPSIG00000003819;ENSPSIG00000006440;ENSPSIG00000010016;ENSPSIG00000010658;ENSPSIG00000011805;ENSPSIG00000013223;ENSPSIG00000014216;ENSPSIG00000014324;ENSPSIG00000014553;ENSPSIG00000015217;ENSPSIG00000015405;ENSPSIG00000017390;ENSPSIG00000017522
Carbon metabolism	ENSPSIG00000003870;ENSPSIG00000004197;ENSPSIG00000005492;ENSPSIG00000005685;ENSPSIG00000006315;ENSPSIG00000006459;ENSPSIG00000006926;ENSPSIG00000007398;ENSPSIG00000007650;ENSPSIG00000007727;ENSPSIG00000008443;ENSPSIG00000008621;ENSPSIG00000009652;ENSPSIG00000011429;ENSPSIG00000012329;ENSPSIG00000012613;ENSPSIG00000012860;ENSPSIG00000013373;ENSPSIG00000013665;ENSPSIG00000014038;ENSPSIG00000014475;…
Steroid hormone biosynthesis	ENSPSIG00000002749;ENSPSIG00000005637;ENSPSIG00000005815;ENSPSIG00000007322;ENSPSIG00000007496;ENSPSIG00000009918;ENSPSIG00000017785
Chagas disease (American trypanosomiasis)	ENSPSIG00000004984
Fc epsilon RI signaling pathway	ENSPSIG00000012649
Osteoclast differentiation	ENSPSIG00000010550;ENSPSIG00000012649
Sulfur relay system	ENSPSIG00000005954;ENSPSIG00000006252;ENSPSIG00000008636;ENSPSIG00000013020;ENSPSIG00000014442
Inflammatory mediator regulation of TRP channels	ENSPSIG00000015563;ENSPSIG00000017390
Aminoacyl-tRNA biosynthesis	ENSPSIG00000003892;ENSPSIG00000004218;ENSPSIG00000005881;ENSPSIG00000006206;ENSPSIG00000007956;ENSPSIG00000008419;ENSPSIG00000009657;ENSPSIG00000011735;ENSPSIG00000012701;ENSPSIG00000012929;ENSPSIG00000013256;ENSPSIG00000015501;ENSPSIG00000015616;ENSPSIG00000016332;ENSPSIG00000018066;ENSPSIG00000018093
Sphingolipid signaling pathway	ENSPSIG00000004984;ENSPSIG00000012649
Glycosphingolipid biosynthesis - ganglio series	ENSPSIG00000004566;ENSPSIG00000007831;ENSPSIG00000007901;ENSPSIG00000009525;ENSPSIG00000012278;ENSPSIG00000013355
Arginine and proline metabolism	ENSPSIG00000002778;ENSPSIG00000005195;ENSPSIG00000005685;ENSPSIG00000006504;ENSPSIG00000006577;ENSPSIG00000010031;ENSPSIG00000010077;ENSPSIG00000012716;ENSPSIG00000014299;ENSPSIG00000014322;ENSPSIG00000015047;ENSPSIG00000015202;ENSPSIG00000017577
Proteoglycans in cancer	ENSPSIG00000010875;ENSPSIG00000012649;ENSPSIG00000017390
Hypertrophic cardiomyopathy (HCM)	ENSPSIG00000010875
Toll-like receptor signaling pathway	ENSPSIG00000000529;ENSPSIG00000000537;ENSPSIG00000002927;ENSPSIG00000002944;ENSPSIG00000003218;ENSPSIG00000004597;ENSPSIG00000005304;ENSPSIG00000005386;ENSPSIG00000005965;ENSPSIG00000006087;ENSPSIG00000006949;ENSPSIG00000007148;ENSPSIG00000008892;ENSPSIG00000008903;ENSPSIG00000009109;ENSPSIG00000009228;ENSPSIG00000009973;ENSPSIG00000010900;ENSPSIG00000012446;ENSPSIG00000012649;ENSPSIG00000013150;…
Gastric acid secretion	ENSPSIG00000015563;ENSPSIG00000017390
Phenylalanine metabolism	ENSPSIG00000005685;ENSPSIG00000011956;ENSPSIG00000012379;ENSPSIG00000014175;ENSPSIG00000014322;ENSPSIG00000015202;ENSPSIG00000015725
Signaling pathways regulating pluripotency of stem cells	ENSPSIG00000004593;ENSPSIG00000006677
Phototransduction	ENSPSIG00000003611;ENSPSIG00000005719;ENSPSIG00000010518;ENSPSIG00000012319;ENSPSIG00000015563
Phosphatidylinositol signaling system	ENSPSIG00000002289;ENSPSIG00000004274;ENSPSIG00000004597;ENSPSIG00000005118;ENSPSIG00000005719;ENSPSIG00000006087;ENSPSIG00000008753;ENSPSIG00000008962;ENSPSIG00000010518;ENSPSIG00000010746;ENSPSIG00000011053;ENSPSIG00000014713;ENSPSIG00000015217;ENSPSIG00000015563;ENSPSIG00000015834;ENSPSIG00000017390;ENSPSIG00000017522;ENSPSIG00000017994
Apoptosis	ENSPSIG00000002944;ENSPSIG00000004216;ENSPSIG00000004597;ENSPSIG00000004865;ENSPSIG00000005304;ENSPSIG00000005528;ENSPSIG00000005965;ENSPSIG00000006087;ENSPSIG00000006104;ENSPSIG00000007409;ENSPSIG00000009553;ENSPSIG00000010550;ENSPSIG00000012616;ENSPSIG00000012902;ENSPSIG00000013223;ENSPSIG00000013387;ENSPSIG00000016817;ENSPSIG00000017235;ENSPSIG00000017775;ENSPSIG00000017925;ENSPSIG00000018217
Cytosolic DNA-sensing pathway	ENSPSIG00000002092;ENSPSIG00000002870;ENSPSIG00000002944;ENSPSIG00000004911;ENSPSIG00000005304;ENSPSIG00000005965;ENSPSIG00000007148;ENSPSIG00000007571;ENSPSIG00000008284;ENSPSIG00000009973;ENSPSIG00000010726;ENSPSIG00000011448;ENSPSIG00000011836;ENSPSIG00000012580;ENSPSIG00000013867;ENSPSIG00000013913;ENSPSIG00000015333;ENSPSIG00000016613;ENSPSIG00000017108
ECM-receptor interaction	ENSPSIG00000003526;ENSPSIG00000004513;ENSPSIG00000004844;ENSPSIG00000005447;ENSPSIG00000006133;ENSPSIG00000006462;ENSPSIG00000006949;ENSPSIG00000006995;ENSPSIG00000013184;ENSPSIG00000013739;ENSPSIG00000014269;ENSPSIG00000014526;ENSPSIG00000015881;ENSPSIG00000015987
One carbon pool by folate	ENSPSIG00000007582;ENSPSIG00000008438;ENSPSIG00000008443;ENSPSIG00000013256
Thyroid hormone signaling pathway	ENSPSIG00000010875
Salmonella infection	ENSPSIG00000000084;ENSPSIG00000001325;ENSPSIG00000002694;ENSPSIG00000002944;ENSPSIG00000003181;ENSPSIG00000003218;ENSPSIG00000005386;ENSPSIG00000005498;ENSPSIG00000005806;ENSPSIG00000007105;ENSPSIG00000007167;ENSPSIG00000008892;ENSPSIG00000008903;ENSPSIG00000009109;ENSPSIG00000009269;ENSPSIG00000009973;ENSPSIG00000010875;ENSPSIG00000012603;ENSPSIG00000012649;ENSPSIG00000013808;ENSPSIG00000014289;…
Intestinal immune network for IgA production	ENSPSIG00000003573;ENSPSIG00000003812;ENSPSIG00000007578;ENSPSIG00000009973;ENSPSIG00000010840;ENSPSIG00000012572;ENSPSIG00000015057;ENSPSIG00000017230;ENSPSIG00000018217
RIG-I-like receptor signaling pathway	ENSPSIG00000002944;ENSPSIG00000004229;ENSPSIG00000005304;ENSPSIG00000005336;ENSPSIG00000005965;ENSPSIG00000007148;ENSPSIG00000008892;ENSPSIG00000008903;ENSPSIG00000009109;ENSPSIG00000009228;ENSPSIG00000011217;ENSPSIG00000011448;ENSPSIG00000013665;ENSPSIG00000013808;ENSPSIG00000014289;ENSPSIG00000015333;ENSPSIG00000015702;ENSPSIG00000016027;ENSPSIG00000017272
Fatty acid biosynthesis	ENSPSIG00000002108;ENSPSIG00000006624;ENSPSIG00000013427;ENSPSIG00000015828;ENSPSIG00000017378
Glutathione metabolism	ENSPSIG00000005021;ENSPSIG00000006504;ENSPSIG00000009183;ENSPSIG00000009363;ENSPSIG00000011509;ENSPSIG00000012560;ENSPSIG00000014299;ENSPSIG00000015167;ENSPSIG00000015195;ENSPSIG00000015319;ENSPSIG00000015623;ENSPSIG00000016322;ENSPSIG00000016761
Glycosylphosphatidylinositol(GPI)-anchor biosynthesis	ENSPSIG00000000497;ENSPSIG00000007541;ENSPSIG00000010942;ENSPSIG00000013127;ENSPSIG00000013320;ENSPSIG00000016501;ENSPSIG00000016865
Sphingolipid metabolism	ENSPSIG00000002609;ENSPSIG00000002641;ENSPSIG00000003509;ENSPSIG00000006650;ENSPSIG00000011877;ENSPSIG00000013733;ENSPSIG00000014723;ENSPSIG00000014728;ENSPSIG00000016314;ENSPSIG00000016673;ENSPSIG00000017567;ENSPSIG00000017620
Starch and sucrose metabolism	ENSPSIG00000002749;ENSPSIG00000006021;ENSPSIG00000006425;ENSPSIG00000006805;ENSPSIG00000006898;ENSPSIG00000007318;ENSPSIG00000007326;ENSPSIG00000010418;ENSPSIG00000011429;ENSPSIG00000014535
Leukocyte transendothelial migration	ENSPSIG00000010875;ENSPSIG00000012649;ENSPSIG00000016506
RNA transport	ENSPSIG00000000500;ENSPSIG00000002191;ENSPSIG00000002672;ENSPSIG00000002770;ENSPSIG00000002810;ENSPSIG00000002847;ENSPSIG00000003636;ENSPSIG00000003719;ENSPSIG00000003898;ENSPSIG00000004082;ENSPSIG00000004398;ENSPSIG00000004417;ENSPSIG00000004706;ENSPSIG00000005458;ENSPSIG00000006102;ENSPSIG00000006185;ENSPSIG00000006335;ENSPSIG00000006537;ENSPSIG00000006737;ENSPSIG00000007346;ENSPSIG00000007526;…
Adherens junction	ENSPSIG00000001325;ENSPSIG00000002694;ENSPSIG00000003218;ENSPSIG00000003607;ENSPSIG00000003826;ENSPSIG00000005706;ENSPSIG00000006400;ENSPSIG00000006653;ENSPSIG00000006829;ENSPSIG00000007167;ENSPSIG00000008577;ENSPSIG00000009228;ENSPSIG00000010875;ENSPSIG00000011564;ENSPSIG00000012603;ENSPSIG00000012649;ENSPSIG00000014614;ENSPSIG00000015328;ENSPSIG00000016395;ENSPSIG00000016706;ENSPSIG00000017242
Histidine metabolism	ENSPSIG00000007919;ENSPSIG00000011212;ENSPSIG00000014175;ENSPSIG00000014322;ENSPSIG00000015047;ENSPSIG00000015202
Neuroactive ligand-receptor interaction	ENSPSIG00000000145;ENSPSIG00000000146;ENSPSIG00000000374;ENSPSIG00000000414;ENSPSIG00000000512;ENSPSIG00000000587;ENSPSIG00000000800;ENSPSIG00000000818;ENSPSIG00000000825;ENSPSIG00000000934;ENSPSIG00000001029;ENSPSIG00000001688;ENSPSIG00000001869;ENSPSIG00000002189;ENSPSIG00000002606;ENSPSIG00000003330;ENSPSIG00000005190;ENSPSIG00000005305;ENSPSIG00000005626;ENSPSIG00000006396;ENSPSIG00000006742;…
Mismatch repair	ENSPSIG00000007756;ENSPSIG00000012688;ENSPSIG00000017443;ENSPSIG00000017451
Regulation of actin cytoskeleton	ENSPSIG00000000106;ENSPSIG00000001325;ENSPSIG00000001688;ENSPSIG00000001869;ENSPSIG00000002694;ENSPSIG00000002785;ENSPSIG00000002811;ENSPSIG00000002978;ENSPSIG00000003218;ENSPSIG00000003819;ENSPSIG00000004082;ENSPSIG00000004597;ENSPSIG00000004844;ENSPSIG00000005498;ENSPSIG00000005662;ENSPSIG00000005666;ENSPSIG00000005706;ENSPSIG00000005806;ENSPSIG00000005891;ENSPSIG00000006087;ENSPSIG00000006400;…
Endocytosis	ENSPSIG00000001737;ENSPSIG00000002139;ENSPSIG00000002226;ENSPSIG00000002325;ENSPSIG00000002326;ENSPSIG00000002332;ENSPSIG00000002634;ENSPSIG00000002866;ENSPSIG00000004531;ENSPSIG00000005459;ENSPSIG00000006343;ENSPSIG00000007157;ENSPSIG00000007537;ENSPSIG00000007562;ENSPSIG00000007804;ENSPSIG00000008046;ENSPSIG00000008874;ENSPSIG00000009234;ENSPSIG00000009767;ENSPSIG00000009912;ENSPSIG00000010588;…
alpha-Linolenic acid metabolism	ENSPSIG00000002757;ENSPSIG00000004304;ENSPSIG00000004306;ENSPSIG00000006664;ENSPSIG00000013982;ENSPSIG00000014360;ENSPSIG00000016939
Wnt signaling pathway	ENSPSIG00000002356;ENSPSIG00000003397;ENSPSIG00000003656;ENSPSIG00000004050;ENSPSIG00000004849;ENSPSIG00000004991;ENSPSIG00000005504;ENSPSIG00000005739;ENSPSIG00000005889;ENSPSIG00000006468;ENSPSIG00000006829;ENSPSIG00000006970;ENSPSIG00000007055;ENSPSIG00000008226;ENSPSIG00000008301;ENSPSIG00000009182;ENSPSIG00000009228;ENSPSIG00000009573;ENSPSIG00000009582;ENSPSIG00000010126;ENSPSIG00000010550;…
