# Supplementary material for: Genome-wide identification and comparison of differentially expressed profiles of miRNAs and lncRNAs with associated ceRNA networks in the gonads of Chinese soft-shelled turtle, Pelodiscus sinensis
Source: BMC Genomics. 2020 Jun 29;21:443. doi: 10.1186/s12864-020-06826-1 (PMC7322844; doi:10.1186/s12864-020-06826-1)
Supplement: Supplementary file 12 — Additional file 12. ceRNA network results [file 12864_2020_6826_MOESM12_ESM.xlsx]

## Sheet: ceRNA_result
mRNA	lncRNA	corr	miRNA_num(mRNA)	miRNA_num(lncRNA)	miRNA_num(both)	miRNA
ENSPSIG00000006337	MSTRG.238910.8	0.93	1	1	1	novel_miR_1696
ENSPSIG00000006337	MSTRG.85342.4	0.9	1	8	1	novel_miR_1696
ENSPSIG00000006337	MSTRG.238910.3	0.96	1	1	1	novel_miR_1696
ENSPSIG00000006337	MSTRG.519667.7	0.83	1	1	1	novel_miR_1696
ENSPSIG00000006337	MSTRG.519667.11	0.85	1	1	1	novel_miR_1696
ENSPSIG00000006337	MSTRG.238910.9	0.82	1	1	1	novel_miR_1696
ENSPSIG00000006337	MSTRG.18339.26	0.94	1	1	1	novel_miR_1696
ENSPSIG00000003161	MSTRG.500744.1	0.87	1	1	1	novel_miR_227
ENSPSIG00000003161	MSTRG.283396.1	0.85	1	3	1	novel_miR_227
ENSPSIG00000003161	MSTRG.409781.3	0.92	1	1	1	novel_miR_227
ENSPSIG00000003161	MSTRG.432959.6	0.9	1	3	1	novel_miR_227
ENSPSIG00000003161	MSTRG.625448.7	0.96	1	1	1	novel_miR_227
ENSPSIG00000003161	MSTRG.169379.1	0.99	1	1	1	novel_miR_227
ENSPSIG00000003161	MSTRG.127836.14	0.96	1	1	1	novel_miR_227
ENSPSIG00000003161	MSTRG.428059.4	0.97	1	1	1	novel_miR_227
ENSPSIG00000003161	MSTRG.403288.1	0.81	1	1	1	novel_miR_227
ENSPSIG00000003161	MSTRG.166873.1	0.81	1	1	1	novel_miR_227
ENSPSIG00000003161	MSTRG.356258.2	0.99	1	1	1	novel_miR_227
ENSPSIG00000003161	MSTRG.242536.7	0.97	1	1	1	novel_miR_227
ENSPSIG00000003161	MSTRG.452940.1	0.92	1	1	1	novel_miR_227
ENSPSIG00000003161	MSTRG.296533.1	0.8	1	1	1	novel_miR_227
ENSPSIG00000003161	MSTRG.148807.9	0.84	1	1	1	novel_miR_227
ENSPSIG00000003161	MSTRG.263965.3	0.94	1	1	1	novel_miR_227
ENSPSIG00000003161	MSTRG.273896.1	0.98	1	1	1	novel_miR_227
ENSPSIG00000003161	MSTRG.457845.11	0.89	1	2	1	novel_miR_227
ENSPSIG00000003161	MSTRG.278530.6	0.85	1	1	1	novel_miR_227
ENSPSIG00000003161	MSTRG.95083.1	0.86	1	1	1	novel_miR_227
ENSPSIG00000003161	MSTRG.634345.5	0.84	1	1	1	novel_miR_227
ENSPSIG00000003161	MSTRG.33503.2	0.94	1	1	1	novel_miR_227
ENSPSIG00000003161	MSTRG.483933.1	0.99	1	1	1	novel_miR_227
ENSPSIG00000003161	MSTRG.58023.1	0.95	1	1	1	novel_miR_227
ENSPSIG00000003161	MSTRG.263965.7	0.85	1	1	1	novel_miR_227
ENSPSIG00000003161	MSTRG.487702.13	0.85	1	1	1	novel_miR_227
ENSPSIG00000003161	MSTRG.27373.1	0.91	1	1	1	novel_miR_227
ENSPSIG00000003161	MSTRG.312667.25	0.85	1	1	1	novel_miR_227
ENSPSIG00000003161	MSTRG.148807.11	0.98	1	1	1	novel_miR_227
ENSPSIG00000003161	MSTRG.592702.1	0.9	1	3	1	novel_miR_227
ENSPSIG00000003161	MSTRG.243070.20	0.87	1	1	1	novel_miR_227
ENSPSIG00000003161	MSTRG.156316.11	0.84	1	1	1	novel_miR_227
ENSPSIG00000003161	MSTRG.429549.4	0.92	1	1	1	novel_miR_227
ENSPSIG00000003161	MSTRG.263965.1	0.98	1	1	1	novel_miR_227
ENSPSIG00000003161	MSTRG.360459.16	0.83	1	1	1	novel_miR_227
ENSPSIG00000003161	MSTRG.393475.1	0.85	1	4	1	novel_miR_227
ENSPSIG00000003161	MSTRG.625448.2	0.99	1	1	1	novel_miR_227
ENSPSIG00000003161	MSTRG.277972.1	0.98	1	1	1	novel_miR_227
ENSPSIG00000003161	MSTRG.262656.1	0.99	1	3	1	novel_miR_227
ENSPSIG00000003161	MSTRG.186299.3	0.91	1	2	1	novel_miR_227
ENSPSIG00000003161	MSTRG.534466.4	0.84	1	1	1	novel_miR_227
ENSPSIG00000003161	MSTRG.660040.1	0.93	1	2	1	novel_miR_227
ENSPSIG00000003161	MSTRG.391877.1	1	1	1	1	novel_miR_227
ENSPSIG00000003161	MSTRG.250571.1	0.92	1	1	1	novel_miR_227
ENSPSIG00000003161	MSTRG.604332.2	0.82	1	1	1	novel_miR_227
ENSPSIG00000003161	MSTRG.627244.1	0.88	1	1	1	novel_miR_227
ENSPSIG00000003161	MSTRG.148807.8	0.96	1	1	1	novel_miR_227
ENSPSIG00000003161	MSTRG.169379.2	0.93	1	1	1	novel_miR_227
ENSPSIG00000003161	MSTRG.263965.4	0.89	1	1	1	novel_miR_227
ENSPSIG00000003161	MSTRG.300464.8	0.92	1	1	1	novel_miR_227
ENSPSIG00000003161	MSTRG.371306.2	0.95	1	1	1	novel_miR_227
ENSPSIG00000003161	MSTRG.45646.2	1	1	1	1	novel_miR_227
ENSPSIG00000003161	MSTRG.60113.9	0.99	1	4	1	novel_miR_227
ENSPSIG00000003161	MSTRG.201661.2	0.97	1	1	1	novel_miR_227
ENSPSIG00000003161	MSTRG.441600.2	0.99	1	2	1	novel_miR_227
ENSPSIG00000003161	MSTRG.463507.1	0.87	1	1	1	novel_miR_227
ENSPSIG00000003161	MSTRG.43134.1	0.9	1	1	1	novel_miR_227
ENSPSIG00000003161	MSTRG.148807.3	0.95	1	1	1	novel_miR_227
ENSPSIG00000003161	MSTRG.487922.2	0.98	1	2	1	novel_miR_227
ENSPSIG00000003161	MSTRG.308847.1	0.92	1	2	1	novel_miR_227
ENSPSIG00000003161	MSTRG.28030.2	0.97	1	5	1	novel_miR_227
ENSPSIG00000003161	MSTRG.412447.6	0.85	1	2	1	novel_miR_227
ENSPSIG00000003161	MSTRG.201159.2	0.94	1	1	1	novel_miR_227
ENSPSIG00000003161	MSTRG.259224.3	0.96	1	1	1	novel_miR_227
ENSPSIG00000003161	MSTRG.656083.1	0.93	1	1	1	novel_miR_227
ENSPSIG00000003161	MSTRG.612996.1	0.98	1	2	1	novel_miR_227
ENSPSIG00000003161	MSTRG.631666.1	0.98	1	2	1	novel_miR_227
ENSPSIG00000003161	MSTRG.128681.2	0.9	1	3	1	novel_miR_227
ENSPSIG00000003161	MSTRG.534812.2	0.97	1	2	1	novel_miR_227
ENSPSIG00000003161	MSTRG.513485.1	0.82	1	3	1	novel_miR_227
ENSPSIG00000003161	MSTRG.259224.1	0.98	1	1	1	novel_miR_227
ENSPSIG00000003161	MSTRG.148807.6	0.95	1	1	1	novel_miR_227
ENSPSIG00000003161	MSTRG.306303.2	0.87	1	2	1	novel_miR_227
ENSPSIG00000003161	MSTRG.496154.1	1	1	1	1	novel_miR_227
ENSPSIG00000003161	MSTRG.18629.15	0.94	1	1	1	novel_miR_227
ENSPSIG00000003161	MSTRG.585388.1	0.97	1	1	1	novel_miR_227
ENSPSIG00000003161	MSTRG.102541.1	0.95	1	3	1	novel_miR_227
ENSPSIG00000003161	MSTRG.635724.3	0.93	1	2	1	novel_miR_227
ENSPSIG00000003161	MSTRG.491024.1	0.92	1	1	1	novel_miR_227
ENSPSIG00000003161	MSTRG.97808.1	0.95	1	1	1	novel_miR_227
ENSPSIG00000003161	MSTRG.292878.15	0.83	1	8	1	novel_miR_227
ENSPSIG00000003161	MSTRG.98381.2	0.86	1	2	1	novel_miR_227
ENSPSIG00000003161	MSTRG.263965.2	0.94	1	1	1	novel_miR_227
ENSPSIG00000003161	MSTRG.278530.5	0.82	1	1	1	novel_miR_227
ENSPSIG00000003161	MSTRG.576177.1	0.97	1	1	1	novel_miR_227
ENSPSIG00000003161	MSTRG.635724.8	0.98	1	2	1	novel_miR_227
ENSPSIG00000003161	MSTRG.162316.1	0.84	1	1	1	novel_miR_227
ENSPSIG00000003161	MSTRG.389309.1	0.87	1	1	1	novel_miR_227
ENSPSIG00000003161	MSTRG.175901.1	0.9	1	3	1	novel_miR_227
ENSPSIG00000003161	MSTRG.124208.5	0.97	1	2	1	novel_miR_227
ENSPSIG00000003161	MSTRG.186299.1	0.95	1	1	1	novel_miR_227
ENSPSIG00000003161	MSTRG.442031.1	0.82	1	1	1	novel_miR_227
ENSPSIG00000004261	MSTRG.249175.1	0.89	1	1	1	novel_miR_42
ENSPSIG00000004261	MSTRG.634733.1	0.96	1	1	1	novel_miR_42
ENSPSIG00000004261	MSTRG.54648.10	0.89	1	1	1	novel_miR_42
ENSPSIG00000004261	MSTRG.127189.1	0.96	1	6	1	novel_miR_42
ENSPSIG00000004261	MSTRG.583114.1	0.83	1	1	1	novel_miR_42
ENSPSIG00000004261	MSTRG.54648.6	0.92	1	1	1	novel_miR_42
ENSPSIG00000004261	MSTRG.339170.5	0.83	1	1	1	novel_miR_42
ENSPSIG00000004261	MSTRG.14398.11	0.85	1	1	1	novel_miR_42
ENSPSIG00000004261	MSTRG.54648.9	0.98	1	3	1	novel_miR_42
ENSPSIG00000004261	MSTRG.589360.1	0.92	1	3	1	novel_miR_42
ENSPSIG00000004261	MSTRG.297168.1	0.89	1	1	1	novel_miR_42
ENSPSIG00000004261	MSTRG.273064.1	0.92	1	1	1	novel_miR_42
ENSPSIG00000004261	MSTRG.97031.1	0.83	1	1	1	novel_miR_42
ENSPSIG00000004261	MSTRG.262634.3	0.86	1	1	1	novel_miR_42
ENSPSIG00000004261	MSTRG.241006.1	1	1	1	1	novel_miR_42
ENSPSIG00000004261	MSTRG.589360.4	0.93	1	3	1	novel_miR_42
ENSPSIG00000004261	MSTRG.368950.1	0.83	1	4	1	novel_miR_42
ENSPSIG00000004261	MSTRG.14398.18	0.96	1	1	1	novel_miR_42
ENSPSIG00000004261	MSTRG.343017.1	0.94	1	1	1	novel_miR_42
ENSPSIG00000004261	MSTRG.14398.19	0.9	1	1	1	novel_miR_42
ENSPSIG00000004261	MSTRG.14398.9	0.87	1	1	1	novel_miR_42
ENSPSIG00000004261	MSTRG.8804.3	0.89	1	4	1	novel_miR_42
ENSPSIG00000004261	MSTRG.250126.3	0.97	1	2	1	novel_miR_42
ENSPSIG00000004261	MSTRG.54648.1	0.97	1	3	1	novel_miR_42
ENSPSIG00000004261	MSTRG.499164.1	0.94	1	1	1	novel_miR_42
ENSPSIG00000004261	MSTRG.54648.3	0.99	1	3	1	novel_miR_42
ENSPSIG00000004261	MSTRG.250126.7	0.94	1	2	1	novel_miR_42
ENSPSIG00000005677	MSTRG.249175.1	0.82	1	1	1	novel_miR_42
ENSPSIG00000005677	MSTRG.54648.4	0.88	1	1	1	novel_miR_42
ENSPSIG00000005677	MSTRG.246980.4	0.8	1	3	1	novel_miR_42
ENSPSIG00000005677	MSTRG.634733.1	0.9	1	1	1	novel_miR_42
ENSPSIG00000005677	MSTRG.54648.10	0.96	1	1	1	novel_miR_42
ENSPSIG00000005677	MSTRG.127189.1	0.95	1	6	1	novel_miR_42
ENSPSIG00000005677	MSTRG.583114.1	0.9	1	1	1	novel_miR_42
ENSPSIG00000005677	MSTRG.54648.6	0.96	1	1	1	novel_miR_42
ENSPSIG00000005677	MSTRG.599370.1	0.85	1	1	1	novel_miR_42
ENSPSIG00000005677	MSTRG.14398.11	0.84	1	1	1	novel_miR_42
ENSPSIG00000005677	MSTRG.54648.9	0.99	1	3	1	novel_miR_42
ENSPSIG00000005677	MSTRG.589360.1	0.88	1	3	1	novel_miR_42
ENSPSIG00000005677	MSTRG.297168.1	0.93	1	1	1	novel_miR_42
ENSPSIG00000005677	MSTRG.273064.1	0.83	1	1	1	novel_miR_42
ENSPSIG00000005677	MSTRG.97031.1	0.83	1	1	1	novel_miR_42
ENSPSIG00000005677	MSTRG.262634.3	0.86	1	1	1	novel_miR_42
ENSPSIG00000005677	MSTRG.241006.1	0.99	1	1	1	novel_miR_42
ENSPSIG00000005677	MSTRG.589360.4	0.97	1	3	1	novel_miR_42
ENSPSIG00000005677	MSTRG.14398.18	1	1	1	1	novel_miR_42
ENSPSIG00000005677	MSTRG.343017.1	0.91	1	1	1	novel_miR_42
ENSPSIG00000005677	MSTRG.14398.19	0.96	1	1	1	novel_miR_42
ENSPSIG00000005677	MSTRG.14398.9	0.9	1	1	1	novel_miR_42
ENSPSIG00000005677	MSTRG.8804.3	0.86	1	4	1	novel_miR_42
ENSPSIG00000005677	MSTRG.250126.3	1	1	2	1	novel_miR_42
ENSPSIG00000005677	MSTRG.54648.1	0.94	1	3	1	novel_miR_42
ENSPSIG00000005677	MSTRG.499164.1	0.94	1	1	1	novel_miR_42
ENSPSIG00000005677	MSTRG.54648.3	0.97	1	3	1	novel_miR_42
ENSPSIG00000005677	MSTRG.250126.7	0.96	1	2	1	novel_miR_42
ENSPSIG00000010337	MSTRG.247901.2	0.83	1	5	1	novel_miR_9914
ENSPSIG00000010337	MSTRG.501157.4	0.87	1	1	1	novel_miR_9914
ENSPSIG00000010337	MSTRG.565504.10	0.94	1	3	1	novel_miR_9914
ENSPSIG00000010337	MSTRG.513020.1	0.93	1	1	1	novel_miR_9914
ENSPSIG00000010337	MSTRG.453854.1	0.89	1	1	1	novel_miR_9914
ENSPSIG00000010337	MSTRG.651643.1	0.83	1	6	1	novel_miR_9914
ENSPSIG00000010337	MSTRG.247901.1	0.94	1	3	1	novel_miR_9914
ENSPSIG00000010337	MSTRG.501157.1	0.84	1	1	1	novel_miR_9914
ENSPSIG00000010337	MSTRG.30243.1	0.97	1	1	1	novel_miR_9914
ENSPSIG00000010337	MSTRG.98381.1	0.88	1	1	1	novel_miR_9914
ENSPSIG00000010337	MSTRG.126571.1	0.9	1	4	1	novel_miR_9914
ENSPSIG00000010337	MSTRG.277921.5	0.87	1	1	1	novel_miR_9914
ENSPSIG00000010337	MSTRG.434588.1	0.99	1	3	1	novel_miR_9914
ENSPSIG00000010337	MSTRG.322132.4	0.81	1	1	1	novel_miR_9914
ENSPSIG00000010337	MSTRG.623523.8	0.97	1	1	1	novel_miR_9914
ENSPSIG00000010337	MSTRG.273468.5	0.83	1	2	1	novel_miR_9914
ENSPSIG00000010337	MSTRG.436942.9	0.87	1	1	1	novel_miR_9914
ENSPSIG00000010337	MSTRG.326652.1	0.98	1	5	1	novel_miR_9914
ENSPSIG00000010337	MSTRG.168465.1	0.87	1	1	1	novel_miR_9914
ENSPSIG00000010337	MSTRG.235518.3	0.96	1	1	1	novel_miR_9914
ENSPSIG00000010337	MSTRG.9837.1	0.88	1	1	1	novel_miR_9914
ENSPSIG00000010337	MSTRG.98381.3	0.93	1	1	1	novel_miR_9914
ENSPSIG00000010337	MSTRG.197512.1	0.85	1	1	1	novel_miR_9914
ENSPSIG00000010337	MSTRG.128949.4	0.93	1	3	1	novel_miR_9914
ENSPSIG00000010337	MSTRG.273468.7	0.86	1	1	1	novel_miR_9914
ENSPSIG00000010337	MSTRG.571642.1	0.98	1	1	1	novel_miR_9914
ENSPSIG00000010337	MSTRG.50332.1	0.99	1	1	1	novel_miR_9914
ENSPSIG00000010337	MSTRG.283214.1	0.99	1	1	1	novel_miR_9914
ENSPSIG00000010337	MSTRG.415157.1	0.81	1	2	1	novel_miR_9914
ENSPSIG00000010337	MSTRG.498963.2	0.92	1	1	1	novel_miR_9914
ENSPSIG00000010337	MSTRG.638440.4	0.88	1	1	1	novel_miR_9914
ENSPSIG00000010337	MSTRG.611117.1	0.84	1	4	1	novel_miR_9914
ENSPSIG00000010337	MSTRG.169989.6	0.95	1	1	1	novel_miR_9914
ENSPSIG00000010337	MSTRG.223055.4	0.98	1	2	1	novel_miR_9914
ENSPSIG00000010337	MSTRG.66988.1	0.82	1	4	1	novel_miR_9914
ENSPSIG00000010337	MSTRG.138919.9	0.85	1	1	1	novel_miR_9914
ENSPSIG00000010337	MSTRG.126571.2	0.87	1	4	1	novel_miR_9914
ENSPSIG00000010337	MSTRG.454471.2	0.89	1	1	1	novel_miR_9914
ENSPSIG00000010337	MSTRG.166226.2	0.96	1	1	1	novel_miR_9914
ENSPSIG00000010337	MSTRG.244210.1	0.93	1	2	1	novel_miR_9914
ENSPSIG00000010337	MSTRG.659641.4	0.98	1	1	1	novel_miR_9914
ENSPSIG00000010337	MSTRG.238076.1	0.96	1	2	1	novel_miR_9914
ENSPSIG00000010337	MSTRG.138919.8	0.81	1	1	1	novel_miR_9914
ENSPSIG00000010337	MSTRG.277921.9	0.9	1	1	1	novel_miR_9914
ENSPSIG00000010337	MSTRG.131588.1	0.98	1	3	1	novel_miR_9914
ENSPSIG00000010337	MSTRG.277921.7	0.96	1	2	1	novel_miR_9914
ENSPSIG00000010337	MSTRG.166226.3	0.87	1	1	1	novel_miR_9914
ENSPSIG00000010337	MSTRG.594884.2	0.95	1	4	1	novel_miR_9914
ENSPSIG00000010337	MSTRG.417.4	0.94	1	2	1	novel_miR_9914
ENSPSIG00000010337	MSTRG.573038.1	0.99	1	1	1	novel_miR_9914
ENSPSIG00000010337	MSTRG.468977.1	0.96	1	6	1	novel_miR_9914
ENSPSIG00000010337	MSTRG.244210.7	0.97	1	2	1	novel_miR_9914
ENSPSIG00000010337	MSTRG.623523.7	0.94	1	1	1	novel_miR_9914
ENSPSIG00000010337	MSTRG.143035.1	0.99	1	2	1	novel_miR_9914
ENSPSIG00000010337	MSTRG.35171.1	0.88	1	5	1	novel_miR_9914
ENSPSIG00000010337	MSTRG.663879.2	0.98	1	1	1	novel_miR_9914
ENSPSIG00000010337	MSTRG.501157.3	0.87	1	1	1	novel_miR_9914
ENSPSIG00000010337	MSTRG.289069.1	0.92	1	1	1	novel_miR_9914
ENSPSIG00000010337	MSTRG.638440.1	0.93	1	1	1	novel_miR_9914
ENSPSIG00000010337	MSTRG.277921.1	0.97	1	1	1	novel_miR_9914
ENSPSIG00000010337	MSTRG.322132.6	0.94	1	1	1	novel_miR_9914
ENSPSIG00000010337	MSTRG.65133.1	0.91	1	1	1	novel_miR_9914
ENSPSIG00000010337	MSTRG.330132.1	0.84	1	2	1	novel_miR_9914
ENSPSIG00000010337	MSTRG.148380.4	0.82	1	2	1	novel_miR_9914
ENSPSIG00000010337	MSTRG.5704.3	0.82	1	1	1	novel_miR_9914
ENSPSIG00000010337	MSTRG.331752.1	0.8	1	4	1	novel_miR_9914
ENSPSIG00000010337	MSTRG.653732.6	0.87	1	4	1	novel_miR_9914
ENSPSIG00000010337	MSTRG.407955.29	0.99	1	1	1	novel_miR_9914
ENSPSIG00000010337	MSTRG.18134.3	0.95	1	2	1	novel_miR_9914
ENSPSIG00000010337	MSTRG.457617.1	0.94	1	1	1	novel_miR_9914
ENSPSIG00000010337	MSTRG.234775.2	0.85	1	1	1	novel_miR_9914
ENSPSIG00000010337	MSTRG.169989.5	0.9	1	1	1	novel_miR_9914
ENSPSIG00000010337	MSTRG.259064.1	0.98	1	1	1	novel_miR_9914
ENSPSIG00000010337	MSTRG.259949.1	0.98	1	3	1	novel_miR_9914
ENSPSIG00000010337	MSTRG.322132.3	0.95	1	1	1	novel_miR_9914
ENSPSIG00000010337	MSTRG.89955.7	0.87	1	1	1	novel_miR_9914
ENSPSIG00000010337	MSTRG.295423.3	0.95	1	1	1	novel_miR_9914
ENSPSIG00000010337	MSTRG.45966.1	0.88	1	1	1	novel_miR_9914
ENSPSIG00000010337	MSTRG.66701.2	0.81	1	2	1	novel_miR_9914
ENSPSIG00000008986	MSTRG.639506.3	0.94	1	1	1	novel_miR_9819
ENSPSIG00000008986	MSTRG.639506.1	0.99	1	1	1	novel_miR_9819
ENSPSIG00000008986	MSTRG.272034.2	0.85	1	2	1	novel_miR_9819
ENSPSIG00000008986	MSTRG.429098.1	1	1	1	1	novel_miR_9819
ENSPSIG00000008986	MSTRG.38398.1	0.86	1	1	1	novel_miR_9819
ENSPSIG00000008986	MSTRG.381395.1	0.97	1	1	1	novel_miR_9819
ENSPSIG00000008986	MSTRG.212326.1	0.89	1	4	1	novel_miR_9819
ENSPSIG00000008986	MSTRG.238824.2	0.96	1	1	1	novel_miR_9819
ENSPSIG00000008986	MSTRG.540112.1	0.95	1	1	1	novel_miR_9819
ENSPSIG00000008986	MSTRG.636018.1	0.87	1	3	1	novel_miR_9819
ENSPSIG00000008700	MSTRG.475348.1	0.92	1	1	1	novel_miR_9525
ENSPSIG00000015193	MSTRG.302405.16	0.99	1	1	1	novel_miR_6671
ENSPSIG00000015193	MSTRG.188220.10	0.95	1	4	1	novel_miR_6671
ENSPSIG00000015193	MSTRG.390504.2	0.84	1	4	1	novel_miR_6671
ENSPSIG00000015193	MSTRG.598762.5	0.8	1	2	1	novel_miR_6671
ENSPSIG00000015193	MSTRG.264946.6	0.87	1	2	1	novel_miR_6671
ENSPSIG00000015193	MSTRG.489194.8	0.94	1	1	1	novel_miR_6671
ENSPSIG00000015193	MSTRG.579752.6	0.86	1	1	1	novel_miR_6671
ENSPSIG00000015193	MSTRG.560256.6	0.86	1	7	1	novel_miR_6671
ENSPSIG00000015193	MSTRG.375694.3	0.93	1	1	1	novel_miR_6671
ENSPSIG00000015193	MSTRG.651187.12	0.83	1	1	1	novel_miR_6671
ENSPSIG00000015193	MSTRG.259622.1	0.96	1	4	1	novel_miR_6671
ENSPSIG00000015193	MSTRG.88161.1	0.96	1	2	1	novel_miR_6671
ENSPSIG00000015193	MSTRG.127233.1	0.86	1	2	1	novel_miR_6671
ENSPSIG00000015193	MSTRG.578439.3	0.87	1	1	1	novel_miR_6671
ENSPSIG00000015193	MSTRG.375694.2	0.87	1	1	1	novel_miR_6671
ENSPSIG00000015193	MSTRG.31171.1	0.84	1	2	1	novel_miR_6671
ENSPSIG00000015193	MSTRG.264946.5	0.97	1	2	1	novel_miR_6671
ENSPSIG00000015193	MSTRG.380989.1	0.82	1	1	1	novel_miR_6671
ENSPSIG00000015193	MSTRG.354569.1	0.99	1	2	1	novel_miR_6671
ENSPSIG00000015193	MSTRG.306303.1	0.9	1	2	1	novel_miR_6671
ENSPSIG00000015193	MSTRG.507663.5	0.96	1	1	1	novel_miR_6671
ENSPSIG00000015193	MSTRG.27017.4	0.83	1	1	1	novel_miR_6671
ENSPSIG00000015193	MSTRG.375694.1	0.83	1	1	1	novel_miR_6671
ENSPSIG00000015193	MSTRG.651187.10	0.92	1	1	1	novel_miR_6671
ENSPSIG00000015193	MSTRG.172933.4	0.9	1	2	1	novel_miR_6671
ENSPSIG00000015193	MSTRG.347683.1	0.99	1	1	1	novel_miR_6671
ENSPSIG00000015193	MSTRG.84010.16	0.86	1	1	1	novel_miR_6671
ENSPSIG00000015193	MSTRG.40795.5	0.83	1	1	1	novel_miR_6671
ENSPSIG00000015193	MSTRG.272587.2	0.84	1	5	1	novel_miR_6671
ENSPSIG00000015193	MSTRG.19475.8	0.83	1	1	1	novel_miR_6671
ENSPSIG00000015193	MSTRG.439459.14	0.88	1	3	1	novel_miR_6671
ENSPSIG00000015193	MSTRG.462686.3	0.84	1	4	1	novel_miR_6671
ENSPSIG00000015193	MSTRG.228638.1	0.87	1	1	1	novel_miR_6671
ENSPSIG00000015193	MSTRG.79097.2	0.92	1	2	1	novel_miR_6671
ENSPSIG00000015193	MSTRG.53387.4	0.96	1	4	1	novel_miR_6671
ENSPSIG00000015193	MSTRG.625050.1	0.85	1	1	1	novel_miR_6671
ENSPSIG00000015193	MSTRG.507663.8	0.99	1	1	1	novel_miR_6671
ENSPSIG00000015193	MSTRG.541311.4	0.96	1	4	1	novel_miR_6671
ENSPSIG00000015193	MSTRG.51323.2	0.81	1	1	1	novel_miR_6671
ENSPSIG00000015193	MSTRG.254530.6	0.86	1	1	1	novel_miR_6671
ENSPSIG00000015193	MSTRG.651187.11	0.82	1	1	1	novel_miR_6671
ENSPSIG00000002421	MSTRG.639506.3	0.93	1	1	1	novel_miR_9819
ENSPSIG00000002421	MSTRG.232472.1	0.91	1	1	1	novel_miR_9819
ENSPSIG00000002421	MSTRG.639506.1	0.89	1	1	1	novel_miR_9819
ENSPSIG00000002421	MSTRG.272034.2	0.84	1	2	1	novel_miR_9819
ENSPSIG00000002421	MSTRG.38398.1	0.92	1	1	1	novel_miR_9819
ENSPSIG00000002421	MSTRG.238824.2	0.82	1	1	1	novel_miR_9819
ENSPSIG00000002421	MSTRG.540112.1	0.93	1	1	1	novel_miR_9819
ENSPSIG00000002421	MSTRG.636018.1	0.99	1	3	1	novel_miR_9819
ENSPSIG00000015777	MSTRG.639506.3	0.96	1	1	1	novel_miR_9819
ENSPSIG00000015777	MSTRG.639506.1	0.98	1	1	1	novel_miR_9819
ENSPSIG00000015777	MSTRG.272034.2	0.8	1	2	1	novel_miR_9819
ENSPSIG00000015777	MSTRG.429098.1	0.98	1	1	1	novel_miR_9819
ENSPSIG00000015777	MSTRG.38398.1	0.84	1	1	1	novel_miR_9819
ENSPSIG00000015777	MSTRG.381395.1	0.93	1	1	1	novel_miR_9819
ENSPSIG00000015777	MSTRG.212326.1	0.91	1	4	1	novel_miR_9819
ENSPSIG00000015777	MSTRG.238824.2	0.92	1	1	1	novel_miR_9819
ENSPSIG00000015777	MSTRG.540112.1	0.93	1	1	1	novel_miR_9819
ENSPSIG00000015777	MSTRG.636018.1	0.88	1	3	1	novel_miR_9819
ENSPSIG00000016673	MSTRG.432248.1	0.95	1	1	1	novel_miR_6319
ENSPSIG00000016673	MSTRG.577463.5	0.93	1	1	1	novel_miR_6319
ENSPSIG00000016673	MSTRG.493024.9	0.81	1	1	1	novel_miR_6319
ENSPSIG00000016673	MSTRG.336905.5	0.96	1	3	1	novel_miR_6319
ENSPSIG00000016673	MSTRG.367379.3	0.82	1	2	1	novel_miR_6319
ENSPSIG00000016673	MSTRG.10983.1	0.91	1	1	1	novel_miR_6319
ENSPSIG00000016673	MSTRG.285321.1	0.91	1	4	1	novel_miR_6319
ENSPSIG00000016673	MSTRG.156584.1	0.95	1	1	1	novel_miR_6319
ENSPSIG00000016673	MSTRG.221129.16	0.98	1	2	1	novel_miR_6319
ENSPSIG00000016673	MSTRG.221129.1	0.81	1	2	1	novel_miR_6319
ENSPSIG00000016673	MSTRG.635724.2	0.93	1	1	1	novel_miR_6319
ENSPSIG00000016673	MSTRG.306400.1	0.94	1	1	1	novel_miR_6319
ENSPSIG00000016673	MSTRG.432248.8	0.99	1	1	1	novel_miR_6319
ENSPSIG00000016673	MSTRG.579880.1	0.85	1	2	1	novel_miR_6319
ENSPSIG00000016673	MSTRG.635724.1	0.89	1	2	1	novel_miR_6319
ENSPSIG00000016673	MSTRG.635724.7	0.99	1	1	1	novel_miR_6319
ENSPSIG00000016673	MSTRG.315104.5	0.8	1	2	1	novel_miR_6319
ENSPSIG00000016673	MSTRG.385886.2	0.99	1	4	1	novel_miR_6319
ENSPSIG00000016673	MSTRG.346719.14	0.81	1	1	1	novel_miR_6319
ENSPSIG00000016673	MSTRG.109379.2	0.98	1	1	1	novel_miR_6319
ENSPSIG00000016673	MSTRG.221129.3	0.89	1	1	1	novel_miR_6319
ENSPSIG00000016673	MSTRG.221129.14	0.94	1	2	1	novel_miR_6319
ENSPSIG00000016673	MSTRG.108023.2	0.89	1	1	1	novel_miR_6319
ENSPSIG00000016673	MSTRG.48491.1	0.82	1	3	1	novel_miR_6319
ENSPSIG00000016673	MSTRG.401183.1	0.96	1	1	1	novel_miR_6319
ENSPSIG00000016673	MSTRG.635724.4	0.92	1	1	1	novel_miR_6319
ENSPSIG00000016673	MSTRG.91452.1	0.94	1	1	1	novel_miR_6319
ENSPSIG00000016673	MSTRG.552622.1	1	1	1	1	novel_miR_6319
ENSPSIG00000016673	MSTRG.524403.1	0.89	1	1	1	novel_miR_6319
ENSPSIG00000016673	MSTRG.364822.3	0.87	1	1	1	novel_miR_6319
ENSPSIG00000016673	MSTRG.91452.3	0.92	1	1	1	novel_miR_6319
ENSPSIG00000005287	MSTRG.71049.8	0.82	1	2	1	novel_miR_1222
ENSPSIG00000005287	MSTRG.356033.2	0.9	1	3	1	novel_miR_1222
ENSPSIG00000005287	MSTRG.31210.2	0.84	1	1	1	novel_miR_1222
ENSPSIG00000005287	MSTRG.340179.1	0.99	1	1	1	novel_miR_1222
ENSPSIG00000005287	MSTRG.658619.2	0.96	1	1	1	novel_miR_1222
ENSPSIG00000005287	MSTRG.359973.1	0.81	1	1	1	novel_miR_1222
ENSPSIG00000005287	MSTRG.472123.2	0.94	1	2	1	novel_miR_1222
ENSPSIG00000005287	MSTRG.517102.1	0.87	1	5	1	novel_miR_1222
ENSPSIG00000005287	MSTRG.592162.7	0.96	1	1	1	novel_miR_1222
ENSPSIG00000005287	MSTRG.116104.1	0.95	1	1	1	novel_miR_1222
ENSPSIG00000005287	MSTRG.173512.1	0.85	1	1	1	novel_miR_1222
ENSPSIG00000005287	MSTRG.71506.2	0.88	1	3	1	novel_miR_1222
ENSPSIG00000005287	MSTRG.626224.2	0.82	1	1	1	novel_miR_1222
ENSPSIG00000005287	MSTRG.335622.2	0.8	1	2	1	novel_miR_1222
ENSPSIG00000005287	MSTRG.188817.3	0.98	1	5	1	novel_miR_1222
ENSPSIG00000005287	MSTRG.102076.2	0.91	1	1	1	novel_miR_1222
ENSPSIG00000005287	MSTRG.575606.1	0.91	1	1	1	novel_miR_1222
ENSPSIG00000005287	MSTRG.162146.3	0.87	1	7	1	novel_miR_1222
ENSPSIG00000005287	MSTRG.233312.9	0.93	1	1	1	novel_miR_1222
ENSPSIG00000005287	MSTRG.374635.1	0.9	1	1	1	novel_miR_1222
ENSPSIG00000005287	MSTRG.319496.1	0.92	1	5	1	novel_miR_1222
ENSPSIG00000005287	MSTRG.516805.6	0.85	1	1	1	novel_miR_1222
ENSPSIG00000005287	MSTRG.77482.1	0.87	1	1	1	novel_miR_1222
ENSPSIG00000005287	MSTRG.566826.1	0.95	1	3	1	novel_miR_1222
ENSPSIG00000005287	MSTRG.250853.1	0.94	1	1	1	novel_miR_1222
ENSPSIG00000005287	MSTRG.403539.35	0.96	1	1	1	novel_miR_1222
ENSPSIG00000005287	MSTRG.428210.1	0.82	1	1	1	novel_miR_1222
ENSPSIG00000005287	MSTRG.513201.1	0.92	1	1	1	novel_miR_1222
ENSPSIG00000005287	MSTRG.598987.1	0.94	1	1	1	novel_miR_1222
ENSPSIG00000005287	MSTRG.174191.1	0.92	1	3	1	novel_miR_1222
ENSPSIG00000005287	MSTRG.297764.1	0.92	1	1	1	novel_miR_1222
ENSPSIG00000005287	MSTRG.185694.1	0.93	1	1	1	novel_miR_1222
ENSPSIG00000005287	MSTRG.30117.3	0.91	1	1	1	novel_miR_1222
ENSPSIG00000005287	MSTRG.278638.3	0.8	1	1	1	novel_miR_1222
ENSPSIG00000005287	MSTRG.66998.4	0.86	1	4	1	novel_miR_1222
ENSPSIG00000005287	MSTRG.568196.1	0.89	1	1	1	novel_miR_1222
ENSPSIG00000005287	MSTRG.665786.3	0.94	1	1	1	novel_miR_1222
ENSPSIG00000005287	MSTRG.294027.2	0.86	1	2	1	novel_miR_1222
ENSPSIG00000005287	MSTRG.388572.2	0.83	1	1	1	novel_miR_1222
ENSPSIG00000005287	MSTRG.141508.2	0.84	1	2	1	novel_miR_1222
ENSPSIG00000005287	MSTRG.264227.3	0.91	1	3	1	novel_miR_1222
ENSPSIG00000005287	MSTRG.253773.9	0.92	1	2	1	novel_miR_1222
ENSPSIG00000005287	MSTRG.253773.10	0.94	1	2	1	novel_miR_1222
ENSPSIG00000005287	MSTRG.39575.2	0.86	1	1	1	novel_miR_1222
ENSPSIG00000005287	MSTRG.474438.1	0.89	1	1	1	novel_miR_1222
ENSPSIG00000005287	MSTRG.274888.1	0.83	1	2	1	novel_miR_1222
ENSPSIG00000005287	MSTRG.666646.1	0.84	1	6	1	novel_miR_1222
ENSPSIG00000005287	MSTRG.196778.1	0.95	1	1	1	novel_miR_1222
ENSPSIG00000009255	MSTRG.379722.4	0.98	1	1	1	novel_miR_6432
ENSPSIG00000009255	MSTRG.461194.1	0.86	1	2	1	novel_miR_6432
ENSPSIG00000009255	MSTRG.646489.15	0.85	1	1	1	novel_miR_6432
ENSPSIG00000009255	MSTRG.428282.6	0.91	1	3	1	novel_miR_6432
ENSPSIG00000009255	MSTRG.439331.5	0.88	1	1	1	novel_miR_6432
ENSPSIG00000009255	MSTRG.185615.1	0.93	1	1	1	novel_miR_6432
ENSPSIG00000009255	MSTRG.58724.1	0.95	1	1	1	novel_miR_6432
ENSPSIG00000009255	MSTRG.379722.2	0.96	1	1	1	novel_miR_6432
ENSPSIG00000009255	MSTRG.235722.1	0.82	1	3	1	novel_miR_6432
ENSPSIG00000009255	MSTRG.635637.1	0.91	1	1	1	novel_miR_6432
ENSPSIG00000008657	MSTRG.281477.1	0.98	1	1	1	novel_miR_6487
ENSPSIG00000008657	MSTRG.452102.13	0.97	1	3	1	novel_miR_6487
ENSPSIG00000008657	MSTRG.11920.1	0.86	1	1	1	novel_miR_6487
ENSPSIG00000008657	MSTRG.317174.1	0.84	1	1	1	novel_miR_6487
ENSPSIG00000008657	MSTRG.346215.1	0.98	1	2	1	novel_miR_6487
ENSPSIG00000008657	MSTRG.271824.1	0.85	1	1	1	novel_miR_6487
ENSPSIG00000008657	MSTRG.168282.1	0.84	1	1	1	novel_miR_6487
ENSPSIG00000008657	MSTRG.405238.1	0.92	1	2	1	novel_miR_6487
ENSPSIG00000008657	MSTRG.658933.11	0.9	1	1	1	novel_miR_6487
ENSPSIG00000008657	MSTRG.487867.1	0.97	1	1	1	novel_miR_6487
ENSPSIG00000008657	MSTRG.346510.1	0.98	1	2	1	novel_miR_6487
ENSPSIG00000008657	MSTRG.281477.2	0.88	1	1	1	novel_miR_6487
ENSPSIG00000008657	MSTRG.188847.7	0.91	1	2	1	novel_miR_6487
ENSPSIG00000006056	MSTRG.205931.1	0.93	1	1	1	novel_miR_9914
ENSPSIG00000006056	MSTRG.501157.4	0.82	1	1	1	novel_miR_9914
ENSPSIG00000006056	MSTRG.565504.10	0.9	1	3	1	novel_miR_9914
ENSPSIG00000006056	MSTRG.314133.4	0.93	1	2	1	novel_miR_9914
ENSPSIG00000006056	MSTRG.513020.1	0.95	1	1	1	novel_miR_9914
ENSPSIG00000006056	MSTRG.498963.1	0.96	1	1	1	novel_miR_9914
ENSPSIG00000006056	MSTRG.512101.4	0.94	1	13	1	novel_miR_9914
ENSPSIG00000006056	MSTRG.651643.1	0.9	1	6	1	novel_miR_9914
ENSPSIG00000006056	MSTRG.247901.1	1	1	3	1	novel_miR_9914
ENSPSIG00000006056	MSTRG.630720.1	0.9	1	2	1	novel_miR_9914
ENSPSIG00000006056	MSTRG.501157.1	0.84	1	1	1	novel_miR_9914
ENSPSIG00000006056	MSTRG.247901.14	0.96	1	3	1	novel_miR_9914
ENSPSIG00000006056	MSTRG.30243.1	0.96	1	1	1	novel_miR_9914
ENSPSIG00000006056	MSTRG.28860.1	0.85	1	3	1	novel_miR_9914
ENSPSIG00000006056	MSTRG.570313.1	0.94	1	1	1	novel_miR_9914
ENSPSIG00000006056	MSTRG.126571.1	0.98	1	4	1	novel_miR_9914
ENSPSIG00000006056	MSTRG.277921.5	0.9	1	1	1	novel_miR_9914
ENSPSIG00000006056	MSTRG.434588.1	0.92	1	3	1	novel_miR_9914
ENSPSIG00000006056	MSTRG.623523.8	0.82	1	1	1	novel_miR_9914
ENSPSIG00000006056	MSTRG.273468.5	0.87	1	2	1	novel_miR_9914
ENSPSIG00000006056	MSTRG.326652.1	0.92	1	5	1	novel_miR_9914
ENSPSIG00000006056	MSTRG.235518.3	0.99	1	1	1	novel_miR_9914
ENSPSIG00000006056	MSTRG.98381.3	0.83	1	1	1	novel_miR_9914
ENSPSIG00000006056	MSTRG.322132.1	0.87	1	1	1	novel_miR_9914
ENSPSIG00000006056	MSTRG.273468.7	0.83	1	1	1	novel_miR_9914
ENSPSIG00000006056	MSTRG.571642.1	0.87	1	1	1	novel_miR_9914
ENSPSIG00000006056	MSTRG.50332.1	0.95	1	1	1	novel_miR_9914
ENSPSIG00000006056	MSTRG.283214.1	0.9	1	1	1	novel_miR_9914
ENSPSIG00000006056	MSTRG.664918.6	0.82	1	2	1	novel_miR_9914
ENSPSIG00000006056	MSTRG.498963.2	0.98	1	1	1	novel_miR_9914
ENSPSIG00000006056	MSTRG.638440.4	0.87	1	1	1	novel_miR_9914
ENSPSIG00000006056	MSTRG.611117.1	0.81	1	4	1	novel_miR_9914
ENSPSIG00000006056	MSTRG.223055.4	0.97	1	2	1	novel_miR_9914
ENSPSIG00000006056	MSTRG.66988.1	0.86	1	4	1	novel_miR_9914
ENSPSIG00000006056	MSTRG.237302.29	0.9	1	1	1	novel_miR_9914
ENSPSIG00000006056	MSTRG.605309.2	0.95	1	1	1	novel_miR_9914
ENSPSIG00000006056	MSTRG.59353.1	0.94	1	3	1	novel_miR_9914
ENSPSIG00000006056	MSTRG.138919.9	0.8	1	1	1	novel_miR_9914
ENSPSIG00000006056	MSTRG.126571.2	0.97	1	4	1	novel_miR_9914
ENSPSIG00000006056	MSTRG.454471.2	0.98	1	1	1	novel_miR_9914
ENSPSIG00000006056	MSTRG.166226.2	0.98	1	1	1	novel_miR_9914
ENSPSIG00000006056	MSTRG.244210.1	0.94	1	2	1	novel_miR_9914
ENSPSIG00000006056	MSTRG.659641.4	0.85	1	1	1	novel_miR_9914
ENSPSIG00000006056	MSTRG.238076.1	0.82	1	2	1	novel_miR_9914
ENSPSIG00000006056	MSTRG.277921.9	0.84	1	1	1	novel_miR_9914
ENSPSIG00000006056	MSTRG.131588.1	0.97	1	3	1	novel_miR_9914
ENSPSIG00000006056	MSTRG.277921.7	0.99	1	2	1	novel_miR_9914
ENSPSIG00000006056	MSTRG.638440.3	0.83	1	1	1	novel_miR_9914
ENSPSIG00000006056	MSTRG.166226.3	0.85	1	1	1	novel_miR_9914
ENSPSIG00000006056	MSTRG.594884.2	0.97	1	4	1	novel_miR_9914
ENSPSIG00000006056	MSTRG.295423.1	0.83	1	1	1	novel_miR_9914
ENSPSIG00000006056	MSTRG.573038.1	0.89	1	1	1	novel_miR_9914
ENSPSIG00000006056	MSTRG.468977.1	0.94	1	6	1	novel_miR_9914
ENSPSIG00000006056	MSTRG.661791.3	0.83	1	4	1	novel_miR_9914
ENSPSIG00000006056	MSTRG.244210.7	0.98	1	2	1	novel_miR_9914
ENSPSIG00000006056	MSTRG.623523.7	0.87	1	1	1	novel_miR_9914
ENSPSIG00000006056	MSTRG.143035.1	0.96	1	2	1	novel_miR_9914
ENSPSIG00000006056	MSTRG.663879.2	0.9	1	1	1	novel_miR_9914
ENSPSIG00000006056	MSTRG.501157.3	0.99	1	1	1	novel_miR_9914
ENSPSIG00000006056	MSTRG.638440.1	0.9	1	1	1	novel_miR_9914
ENSPSIG00000006056	MSTRG.207450.2	0.83	1	1	1	novel_miR_9914
ENSPSIG00000006056	MSTRG.277921.1	0.82	1	1	1	novel_miR_9914
ENSPSIG00000006056	MSTRG.322132.6	0.85	1	1	1	novel_miR_9914
ENSPSIG00000006056	MSTRG.330132.1	0.95	1	2	1	novel_miR_9914
ENSPSIG00000006056	MSTRG.250126.6	0.8	1	1	1	novel_miR_9914
ENSPSIG00000006056	MSTRG.5704.3	0.87	1	1	1	novel_miR_9914
ENSPSIG00000006056	MSTRG.138919.11	0.82	1	2	1	novel_miR_9914
ENSPSIG00000006056	MSTRG.653732.6	0.99	1	4	1	novel_miR_9914
ENSPSIG00000006056	MSTRG.407955.29	0.96	1	1	1	novel_miR_9914
ENSPSIG00000006056	MSTRG.18134.3	0.8	1	2	1	novel_miR_9914
ENSPSIG00000006056	MSTRG.234775.2	0.83	1	1	1	novel_miR_9914
ENSPSIG00000006056	MSTRG.259064.1	0.85	1	1	1	novel_miR_9914
ENSPSIG00000006056	MSTRG.181068.1	0.89	1	6	1	novel_miR_9914
ENSPSIG00000006056	MSTRG.259949.1	0.96	1	3	1	novel_miR_9914
ENSPSIG00000006056	MSTRG.322132.3	0.8	1	1	1	novel_miR_9914
ENSPSIG00000006056	MSTRG.331858.1	0.91	1	1	1	novel_miR_9914
ENSPSIG00000006056	MSTRG.89955.7	0.94	1	1	1	novel_miR_9914
ENSPSIG00000006056	MSTRG.295423.3	0.85	1	1	1	novel_miR_9914
ENSPSIG00000006056	MSTRG.45966.1	0.98	1	1	1	novel_miR_9914
ENSPSIG00000006056	MSTRG.513142.1	0.83	1	2	1	novel_miR_9914
ENSPSIG00000006056	MSTRG.66701.2	0.97	1	2	1	novel_miR_9914
ENSPSIG00000014686	MSTRG.109183.1	0.97	1	1	1	novel_miR_6721
ENSPSIG00000014686	MSTRG.313070.4	0.88	1	1	1	novel_miR_6721
ENSPSIG00000014686	MSTRG.410711.1	0.95	1	1	1	novel_miR_6721
ENSPSIG00000014686	MSTRG.17912.2	0.92	1	1	1	novel_miR_6721
ENSPSIG00000014686	MSTRG.94428.8	0.96	1	1	1	novel_miR_6721
ENSPSIG00000014686	MSTRG.322831.1	0.9	1	1	1	novel_miR_6721
ENSPSIG00000014686	MSTRG.213494.2	0.97	1	1	1	novel_miR_6721
ENSPSIG00000014686	MSTRG.57608.2	0.86	1	2	1	novel_miR_6721
ENSPSIG00000014686	MSTRG.136970.3	0.9	1	1	1	novel_miR_6721
ENSPSIG00000014686	MSTRG.105448.2	0.94	1	1	1	novel_miR_6721
ENSPSIG00000014686	MSTRG.209748.1	0.84	1	1	1	novel_miR_6721
ENSPSIG00000014686	MSTRG.126855.1	0.98	1	1	1	novel_miR_6721
ENSPSIG00000014686	MSTRG.215504.1	0.88	1	5	1	novel_miR_6721
ENSPSIG00000014686	MSTRG.292878.27	0.89	1	3	1	novel_miR_6721
ENSPSIG00000014686	MSTRG.225371.1	0.92	1	1	1	novel_miR_6721
ENSPSIG00000014686	MSTRG.652915.1	0.84	1	4	1	novel_miR_6721
ENSPSIG00000014686	MSTRG.444160.1	0.95	1	1	1	novel_miR_6721
ENSPSIG00000014686	MSTRG.69714.1	0.97	1	2	1	novel_miR_6721
ENSPSIG00000014686	MSTRG.455122.33	0.97	1	1	1	novel_miR_6721
ENSPSIG00000014686	MSTRG.627212.1	0.97	1	1	1	novel_miR_6721
ENSPSIG00000014686	MSTRG.562190.5	0.95	1	1	1	novel_miR_6721
ENSPSIG00000014686	MSTRG.45383.37	0.99	1	1	1	novel_miR_6721
ENSPSIG00000014686	MSTRG.604878.1	0.83	1	3	1	novel_miR_6721
ENSPSIG00000014686	MSTRG.206999.2	0.8	1	1	1	novel_miR_6721
ENSPSIG00000014686	MSTRG.652915.3	0.82	1	4	1	novel_miR_6721
ENSPSIG00000014686	MSTRG.320449.1	0.99	1	1	1	novel_miR_6721
ENSPSIG00000014686	MSTRG.94428.7	0.95	1	1	1	novel_miR_6721
ENSPSIG00000014686	MSTRG.128675.1	0.96	1	2	1	novel_miR_6721
ENSPSIG00000014686	MSTRG.213494.1	0.93	1	1	1	novel_miR_6721
ENSPSIG00000014686	MSTRG.360112.1	0.89	1	3	1	novel_miR_6721
ENSPSIG00000014686	MSTRG.215504.3	0.84	1	5	1	novel_miR_6721
ENSPSIG00000014686	MSTRG.631193.6	0.99	1	1	1	novel_miR_6721
ENSPSIG00000014686	MSTRG.502583.4	0.84	1	1	1	novel_miR_6721
ENSPSIG00000014686	MSTRG.71959.2	1	1	3	1	novel_miR_6721
ENSPSIG00000014686	MSTRG.614155.1	0.98	1	1	1	novel_miR_6721
ENSPSIG00000014686	MSTRG.577917.2	0.99	1	6	1	novel_miR_6721
ENSPSIG00000014686	MSTRG.111579.1	0.89	1	1	1	novel_miR_6721
ENSPSIG00000014686	MSTRG.88603.1	0.9	1	1	1	novel_miR_6721
ENSPSIG00000014686	MSTRG.431324.1	0.89	1	1	1	novel_miR_6721
ENSPSIG00000014686	MSTRG.97650.1	0.89	1	1	1	novel_miR_6721
ENSPSIG00000014686	MSTRG.419766.1	0.94	1	2	1	novel_miR_6721
ENSPSIG00000014686	MSTRG.34668.2	0.86	1	5	1	novel_miR_6721
ENSPSIG00000014686	MSTRG.316780.2	0.99	1	1	1	novel_miR_6721
ENSPSIG00000014686	MSTRG.105448.1	0.99	1	1	1	novel_miR_6721
ENSPSIG00000012897	MSTRG.515132.1	0.99	1	1	1	novel_miR_5927
ENSPSIG00000012897	MSTRG.441126.26	0.86	1	2	1	novel_miR_5927
ENSPSIG00000012897	MSTRG.264393.21	0.93	1	3	1	novel_miR_5927
ENSPSIG00000012897	MSTRG.515132.2	0.91	1	1	1	novel_miR_5927
ENSPSIG00000012897	MSTRG.125468.4	0.99	1	3	1	novel_miR_5927
ENSPSIG00000012897	MSTRG.125468.6	0.88	1	3	1	novel_miR_5927
ENSPSIG00000012897	MSTRG.92896.1	0.88	1	2	1	novel_miR_5927
ENSPSIG00000012897	MSTRG.264393.20	0.84	1	1	1	novel_miR_5927
ENSPSIG00000014766	MSTRG.109183.1	0.85	1	1	1	novel_miR_6721
ENSPSIG00000014766	MSTRG.410711.1	0.98	1	1	1	novel_miR_6721
ENSPSIG00000014766	MSTRG.17912.2	0.88	1	1	1	novel_miR_6721
ENSPSIG00000014766	MSTRG.94428.8	0.84	1	1	1	novel_miR_6721
ENSPSIG00000014766	MSTRG.593614.1	0.85	1	1	1	novel_miR_6721
ENSPSIG00000014766	MSTRG.322831.1	0.86	1	1	1	novel_miR_6721
ENSPSIG00000014766	MSTRG.213494.2	0.87	1	1	1	novel_miR_6721
ENSPSIG00000014766	MSTRG.57608.2	0.83	1	2	1	novel_miR_6721
ENSPSIG00000014766	MSTRG.136970.3	0.84	1	1	1	novel_miR_6721
ENSPSIG00000014766	MSTRG.105448.2	0.98	1	1	1	novel_miR_6721
ENSPSIG00000014766	MSTRG.209748.1	0.93	1	1	1	novel_miR_6721
ENSPSIG00000014766	MSTRG.126855.1	0.98	1	1	1	novel_miR_6721
ENSPSIG00000014766	MSTRG.215504.1	0.84	1	5	1	novel_miR_6721
ENSPSIG00000014766	MSTRG.292878.27	0.98	1	3	1	novel_miR_6721
ENSPSIG00000014766	MSTRG.447588.1	0.83	1	1	1	novel_miR_6721
ENSPSIG00000014766	MSTRG.225371.1	0.97	1	1	1	novel_miR_6721
ENSPSIG00000014766	MSTRG.652915.1	0.91	1	4	1	novel_miR_6721
ENSPSIG00000014766	MSTRG.574339.3	0.83	1	2	1	novel_miR_6721
ENSPSIG00000014766	MSTRG.444160.1	0.83	1	1	1	novel_miR_6721
ENSPSIG00000014766	MSTRG.69714.1	0.94	1	2	1	novel_miR_6721
ENSPSIG00000014766	MSTRG.455122.33	0.94	1	1	1	novel_miR_6721
ENSPSIG00000014766	MSTRG.627212.1	0.87	1	1	1	novel_miR_6721
ENSPSIG00000014766	MSTRG.562190.5	0.94	1	1	1	novel_miR_6721
ENSPSIG00000014766	MSTRG.45383.37	0.94	1	1	1	novel_miR_6721
ENSPSIG00000014766	MSTRG.237745.8	0.91	1	1	1	novel_miR_6721
ENSPSIG00000014766	MSTRG.604878.1	0.93	1	3	1	novel_miR_6721
ENSPSIG00000014766	MSTRG.206999.2	0.83	1	1	1	novel_miR_6721
ENSPSIG00000014766	MSTRG.320449.1	0.89	1	1	1	novel_miR_6721
ENSPSIG00000014766	MSTRG.94428.7	0.85	1	1	1	novel_miR_6721
ENSPSIG00000014766	MSTRG.128675.1	0.88	1	2	1	novel_miR_6721
ENSPSIG00000014766	MSTRG.213494.1	0.82	1	1	1	novel_miR_6721
ENSPSIG00000014766	MSTRG.215504.3	0.88	1	5	1	novel_miR_6721
ENSPSIG00000014766	MSTRG.631193.6	0.92	1	1	1	novel_miR_6721
ENSPSIG00000014766	MSTRG.502583.4	0.94	1	1	1	novel_miR_6721
ENSPSIG00000014766	MSTRG.71959.2	0.97	1	3	1	novel_miR_6721
ENSPSIG00000014766	MSTRG.614155.1	0.96	1	1	1	novel_miR_6721
ENSPSIG00000014766	MSTRG.577917.2	0.93	1	6	1	novel_miR_6721
ENSPSIG00000014766	MSTRG.455122.9	0.8	1	1	1	novel_miR_6721
ENSPSIG00000014766	MSTRG.111579.1	0.92	1	1	1	novel_miR_6721
ENSPSIG00000014766	MSTRG.88603.1	0.87	1	1	1	novel_miR_6721
ENSPSIG00000014766	MSTRG.322696.1	0.86	1	1	1	novel_miR_6721
ENSPSIG00000014766	MSTRG.97650.1	0.84	1	1	1	novel_miR_6721
ENSPSIG00000014766	MSTRG.419766.1	0.9	1	2	1	novel_miR_6721
ENSPSIG00000014766	MSTRG.34668.2	0.86	1	5	1	novel_miR_6721
ENSPSIG00000014766	MSTRG.316780.2	0.93	1	1	1	novel_miR_6721
ENSPSIG00000014766	MSTRG.105448.1	0.94	1	1	1	novel_miR_6721
ENSPSIG00000013072	MSTRG.639506.3	0.94	1	1	1	novel_miR_9819
ENSPSIG00000013072	MSTRG.639506.1	0.99	1	1	1	novel_miR_9819
ENSPSIG00000013072	MSTRG.272034.2	0.88	1	2	1	novel_miR_9819
ENSPSIG00000013072	MSTRG.429098.1	0.99	1	1	1	novel_miR_9819
ENSPSIG00000013072	MSTRG.38398.1	0.89	1	1	1	novel_miR_9819
ENSPSIG00000013072	MSTRG.381395.1	0.98	1	1	1	novel_miR_9819
ENSPSIG00000013072	MSTRG.212326.1	0.86	1	4	1	novel_miR_9819
ENSPSIG00000013072	MSTRG.238824.2	0.97	1	1	1	novel_miR_9819
ENSPSIG00000013072	MSTRG.540112.1	0.96	1	1	1	novel_miR_9819
ENSPSIG00000013072	MSTRG.636018.1	0.89	1	3	1	novel_miR_9819
ENSPSIG00000013072	MSTRG.381381.11	0.81	1	3	1	novel_miR_9819
ENSPSIG00000014325	MSTRG.500744.1	0.95	1	1	1	novel_miR_227
ENSPSIG00000014325	MSTRG.283396.1	0.91	1	3	1	novel_miR_227
ENSPSIG00000014325	MSTRG.409781.3	0.98	1	1	1	novel_miR_227
ENSPSIG00000014325	MSTRG.432959.6	0.81	1	3	1	novel_miR_227
ENSPSIG00000014325	MSTRG.625448.7	0.9	1	1	1	novel_miR_227
ENSPSIG00000014325	MSTRG.259224.2	0.89	1	1	1	novel_miR_227
ENSPSIG00000014325	MSTRG.169379.1	0.99	1	1	1	novel_miR_227
ENSPSIG00000014325	MSTRG.127836.14	0.99	1	1	1	novel_miR_227
ENSPSIG00000014325	MSTRG.428059.4	0.9	1	1	1	novel_miR_227
ENSPSIG00000014325	MSTRG.403288.1	0.85	1	1	1	novel_miR_227
ENSPSIG00000014325	MSTRG.166873.1	0.91	1	1	1	novel_miR_227
ENSPSIG00000014325	MSTRG.356258.2	0.99	1	1	1	novel_miR_227
ENSPSIG00000014325	MSTRG.242536.7	0.97	1	1	1	novel_miR_227
ENSPSIG00000014325	MSTRG.452940.1	0.89	1	1	1	novel_miR_227
ENSPSIG00000014325	MSTRG.296533.1	0.85	1	1	1	novel_miR_227
ENSPSIG00000014325	MSTRG.263965.3	0.96	1	1	1	novel_miR_227
ENSPSIG00000014325	MSTRG.273896.1	0.9	1	1	1	novel_miR_227
ENSPSIG00000014325	MSTRG.457845.11	0.88	1	2	1	novel_miR_227
ENSPSIG00000014325	MSTRG.37323.1	0.88	1	1	1	novel_miR_227
ENSPSIG00000014325	MSTRG.278530.6	0.96	1	1	1	novel_miR_227
ENSPSIG00000014325	MSTRG.95083.1	0.85	1	1	1	novel_miR_227
ENSPSIG00000014325	MSTRG.634345.5	0.91	1	1	1	novel_miR_227
ENSPSIG00000014325	MSTRG.33503.2	0.84	1	1	1	novel_miR_227
ENSPSIG00000014325	MSTRG.483933.1	0.96	1	1	1	novel_miR_227
ENSPSIG00000014325	MSTRG.58023.1	0.88	1	1	1	novel_miR_227
ENSPSIG00000014325	MSTRG.263965.7	0.93	1	1	1	novel_miR_227
ENSPSIG00000014325	MSTRG.27373.1	0.98	1	1	1	novel_miR_227
ENSPSIG00000014325	MSTRG.312667.25	0.94	1	1	1	novel_miR_227
ENSPSIG00000014325	MSTRG.148807.11	0.95	1	1	1	novel_miR_227
ENSPSIG00000014325	MSTRG.592702.1	0.93	1	3	1	novel_miR_227
ENSPSIG00000014325	MSTRG.156316.11	0.94	1	1	1	novel_miR_227
ENSPSIG00000014325	MSTRG.429549.4	0.87	1	1	1	novel_miR_227
ENSPSIG00000014325	MSTRG.263965.1	0.97	1	1	1	novel_miR_227
ENSPSIG00000014325	MSTRG.360459.16	0.87	1	1	1	novel_miR_227
ENSPSIG00000014325	MSTRG.393475.1	0.83	1	4	1	novel_miR_227
ENSPSIG00000014325	MSTRG.625448.2	0.99	1	1	1	novel_miR_227
ENSPSIG00000014325	MSTRG.148807.4	0.85	1	1	1	novel_miR_227
ENSPSIG00000014325	MSTRG.277972.1	0.93	1	1	1	novel_miR_227
ENSPSIG00000014325	MSTRG.262656.1	0.93	1	3	1	novel_miR_227
ENSPSIG00000014325	MSTRG.186299.3	0.9	1	2	1	novel_miR_227
ENSPSIG00000014325	MSTRG.534466.4	0.89	1	1	1	novel_miR_227
ENSPSIG00000014325	MSTRG.58432.2	0.88	1	1	1	novel_miR_227
ENSPSIG00000014325	MSTRG.660040.1	0.96	1	2	1	novel_miR_227
ENSPSIG00000014325	MSTRG.391877.1	0.98	1	1	1	novel_miR_227
ENSPSIG00000014325	MSTRG.404420.1	0.81	1	1	1	novel_miR_227
ENSPSIG00000014325	MSTRG.250571.1	0.99	1	1	1	novel_miR_227
ENSPSIG00000014325	MSTRG.604332.2	0.83	1	1	1	novel_miR_227
ENSPSIG00000014325	MSTRG.625448.3	0.9	1	1	1	novel_miR_227
ENSPSIG00000014325	MSTRG.148807.8	0.89	1	1	1	novel_miR_227
ENSPSIG00000014325	MSTRG.169379.2	0.95	1	1	1	novel_miR_227
ENSPSIG00000014325	MSTRG.263965.4	0.94	1	1	1	novel_miR_227
ENSPSIG00000014325	MSTRG.503102.1	0.86	1	2	1	novel_miR_227
ENSPSIG00000014325	MSTRG.300464.8	0.8	1	1	1	novel_miR_227
ENSPSIG00000014325	MSTRG.625448.4	0.88	1	1	1	novel_miR_227
ENSPSIG00000014325	MSTRG.371306.2	0.91	1	1	1	novel_miR_227
ENSPSIG00000014325	MSTRG.45646.2	0.98	1	1	1	novel_miR_227
ENSPSIG00000014325	MSTRG.60113.9	0.99	1	4	1	novel_miR_227
ENSPSIG00000014325	MSTRG.201661.2	0.92	1	1	1	novel_miR_227
ENSPSIG00000014325	MSTRG.441600.2	0.99	1	2	1	novel_miR_227
ENSPSIG00000014325	MSTRG.463507.1	0.93	1	1	1	novel_miR_227
ENSPSIG00000014325	MSTRG.43134.1	0.94	1	1	1	novel_miR_227
ENSPSIG00000014325	MSTRG.148807.3	0.88	1	1	1	novel_miR_227
ENSPSIG00000014325	MSTRG.487922.2	0.92	1	2	1	novel_miR_227
ENSPSIG00000014325	MSTRG.58432.1	0.88	1	1	1	novel_miR_227
ENSPSIG00000014325	MSTRG.313942.24	0.84	1	2	1	novel_miR_227
ENSPSIG00000014325	MSTRG.28030.2	0.97	1	5	1	novel_miR_227
ENSPSIG00000014325	MSTRG.362909.1	0.92	1	1	1	novel_miR_227
ENSPSIG00000014325	MSTRG.263472.4	0.84	1	1	1	novel_miR_227
ENSPSIG00000014325	MSTRG.238718.1	0.91	1	1	1	novel_miR_227
ENSPSIG00000014325	MSTRG.201159.2	0.97	1	1	1	novel_miR_227
ENSPSIG00000014325	MSTRG.259224.3	0.91	1	1	1	novel_miR_227
ENSPSIG00000014325	MSTRG.656083.1	0.98	1	1	1	novel_miR_227
ENSPSIG00000014325	MSTRG.612996.1	0.98	1	2	1	novel_miR_227
ENSPSIG00000014325	MSTRG.22015.3	0.85	1	3	1	novel_miR_227
ENSPSIG00000014325	MSTRG.210822.5	0.91	1	1	1	novel_miR_227
ENSPSIG00000014325	MSTRG.631666.1	0.92	1	2	1	novel_miR_227
ENSPSIG00000014325	MSTRG.128681.2	0.93	1	3	1	novel_miR_227
ENSPSIG00000014325	MSTRG.534812.2	1	1	2	1	novel_miR_227
ENSPSIG00000014325	MSTRG.513485.1	0.85	1	3	1	novel_miR_227
ENSPSIG00000014325	MSTRG.259224.1	0.95	1	1	1	novel_miR_227
ENSPSIG00000014325	MSTRG.148807.6	0.99	1	1	1	novel_miR_227
ENSPSIG00000014325	MSTRG.327025.1	0.84	1	2	1	novel_miR_227
ENSPSIG00000014325	MSTRG.346719.20	0.83	1	1	1	novel_miR_227
ENSPSIG00000014325	MSTRG.306303.2	0.96	1	2	1	novel_miR_227
ENSPSIG00000014325	MSTRG.496154.1	0.96	1	1	1	novel_miR_227
ENSPSIG00000014325	MSTRG.18629.15	0.96	1	1	1	novel_miR_227
ENSPSIG00000014325	MSTRG.585388.1	0.96	1	1	1	novel_miR_227
ENSPSIG00000014325	MSTRG.102541.1	0.99	1	3	1	novel_miR_227
ENSPSIG00000014325	MSTRG.635724.3	0.93	1	2	1	novel_miR_227
ENSPSIG00000014325	MSTRG.491024.1	0.97	1	1	1	novel_miR_227
ENSPSIG00000014325	MSTRG.97808.1	0.97	1	1	1	novel_miR_227
ENSPSIG00000014325	MSTRG.292878.15	0.94	1	8	1	novel_miR_227
ENSPSIG00000014325	MSTRG.98381.2	0.96	1	2	1	novel_miR_227
ENSPSIG00000014325	MSTRG.57543.10	0.88	1	3	1	novel_miR_227
ENSPSIG00000014325	MSTRG.263965.2	0.91	1	1	1	novel_miR_227
ENSPSIG00000014325	MSTRG.191786.1	0.85	1	2	1	novel_miR_227
ENSPSIG00000014325	MSTRG.278530.5	0.93	1	1	1	novel_miR_227
ENSPSIG00000014325	MSTRG.576177.1	0.87	1	1	1	novel_miR_227
ENSPSIG00000014325	MSTRG.635724.8	0.97	1	2	1	novel_miR_227
ENSPSIG00000014325	MSTRG.162316.1	0.9	1	1	1	novel_miR_227
ENSPSIG00000014325	MSTRG.389309.1	0.95	1	1	1	novel_miR_227
ENSPSIG00000014325	MSTRG.295353.2	0.85	1	1	1	novel_miR_227
ENSPSIG00000014325	MSTRG.175901.1	0.91	1	3	1	novel_miR_227
ENSPSIG00000014325	MSTRG.124208.5	0.99	1	2	1	novel_miR_227
ENSPSIG00000014325	MSTRG.367985.1	0.86	1	1	1	novel_miR_227
ENSPSIG00000014325	MSTRG.186299.1	0.98	1	1	1	novel_miR_227
ENSPSIG00000014325	MSTRG.442031.1	0.92	1	1	1	novel_miR_227
ENSPSIG00000011481	MSTRG.205931.1	0.94	1	1	1	novel_miR_9914
ENSPSIG00000011481	MSTRG.501157.4	0.82	1	1	1	novel_miR_9914
ENSPSIG00000011481	MSTRG.565504.10	0.9	1	3	1	novel_miR_9914
ENSPSIG00000011481	MSTRG.314133.4	0.94	1	2	1	novel_miR_9914
ENSPSIG00000011481	MSTRG.513020.1	0.95	1	1	1	novel_miR_9914
ENSPSIG00000011481	MSTRG.520150.2	0.81	1	2	1	novel_miR_9914
ENSPSIG00000011481	MSTRG.498963.1	0.97	1	1	1	novel_miR_9914
ENSPSIG00000011481	MSTRG.512101.4	0.95	1	13	1	novel_miR_9914
ENSPSIG00000011481	MSTRG.651643.1	0.91	1	6	1	novel_miR_9914
ENSPSIG00000011481	MSTRG.247901.1	0.99	1	3	1	novel_miR_9914
ENSPSIG00000011481	MSTRG.630720.1	0.91	1	2	1	novel_miR_9914
ENSPSIG00000011481	MSTRG.501157.1	0.85	1	1	1	novel_miR_9914
ENSPSIG00000011481	MSTRG.247901.14	0.96	1	3	1	novel_miR_9914
ENSPSIG00000011481	MSTRG.30243.1	0.95	1	1	1	novel_miR_9914
ENSPSIG00000011481	MSTRG.28860.1	0.86	1	3	1	novel_miR_9914
ENSPSIG00000011481	MSTRG.570313.1	0.94	1	1	1	novel_miR_9914
ENSPSIG00000011481	MSTRG.126571.1	0.98	1	4	1	novel_miR_9914
ENSPSIG00000011481	MSTRG.277921.5	0.9	1	1	1	novel_miR_9914
ENSPSIG00000011481	MSTRG.434588.1	0.91	1	3	1	novel_miR_9914
ENSPSIG00000011481	MSTRG.623523.8	0.8	1	1	1	novel_miR_9914
ENSPSIG00000011481	MSTRG.273468.5	0.87	1	2	1	novel_miR_9914
ENSPSIG00000011481	MSTRG.326652.1	0.91	1	5	1	novel_miR_9914
ENSPSIG00000011481	MSTRG.235518.3	0.99	1	1	1	novel_miR_9914
ENSPSIG00000011481	MSTRG.98381.3	0.82	1	1	1	novel_miR_9914
ENSPSIG00000011481	MSTRG.322132.1	0.87	1	1	1	novel_miR_9914
ENSPSIG00000011481	MSTRG.273468.7	0.82	1	1	1	novel_miR_9914
ENSPSIG00000011481	MSTRG.571642.1	0.85	1	1	1	novel_miR_9914
ENSPSIG00000011481	MSTRG.50332.1	0.95	1	1	1	novel_miR_9914
ENSPSIG00000011481	MSTRG.283214.1	0.89	1	1	1	novel_miR_9914
ENSPSIG00000011481	MSTRG.664918.6	0.83	1	2	1	novel_miR_9914
ENSPSIG00000011481	MSTRG.498963.2	0.98	1	1	1	novel_miR_9914
ENSPSIG00000011481	MSTRG.638440.4	0.87	1	1	1	novel_miR_9914
ENSPSIG00000011481	MSTRG.611117.1	0.81	1	4	1	novel_miR_9914
ENSPSIG00000011481	MSTRG.223055.4	0.96	1	2	1	novel_miR_9914
ENSPSIG00000011481	MSTRG.66988.1	0.87	1	4	1	novel_miR_9914
ENSPSIG00000011481	MSTRG.237302.29	0.91	1	1	1	novel_miR_9914
ENSPSIG00000011481	MSTRG.605309.2	0.96	1	1	1	novel_miR_9914
ENSPSIG00000011481	MSTRG.59353.1	0.95	1	3	1	novel_miR_9914
ENSPSIG00000011481	MSTRG.138919.9	0.8	1	1	1	novel_miR_9914
ENSPSIG00000011481	MSTRG.126571.2	0.97	1	4	1	novel_miR_9914
ENSPSIG00000011481	MSTRG.454471.2	0.98	1	1	1	novel_miR_9914
ENSPSIG00000011481	MSTRG.166226.2	0.97	1	1	1	novel_miR_9914
ENSPSIG00000011481	MSTRG.244210.1	0.94	1	2	1	novel_miR_9914
ENSPSIG00000011481	MSTRG.659641.4	0.84	1	1	1	novel_miR_9914
ENSPSIG00000011481	MSTRG.238076.1	0.81	1	2	1	novel_miR_9914
ENSPSIG00000011481	MSTRG.277921.9	0.83	1	1	1	novel_miR_9914
ENSPSIG00000011481	MSTRG.131588.1	0.96	1	3	1	novel_miR_9914
ENSPSIG00000011481	MSTRG.277921.7	0.99	1	2	1	novel_miR_9914
ENSPSIG00000011481	MSTRG.638440.3	0.84	1	1	1	novel_miR_9914
ENSPSIG00000011481	MSTRG.166226.3	0.85	1	1	1	novel_miR_9914
ENSPSIG00000011481	MSTRG.594884.2	0.97	1	4	1	novel_miR_9914
ENSPSIG00000011481	MSTRG.295423.1	0.84	1	1	1	novel_miR_9914
ENSPSIG00000011481	MSTRG.573038.1	0.88	1	1	1	novel_miR_9914
ENSPSIG00000011481	MSTRG.468977.1	0.94	1	6	1	novel_miR_9914
ENSPSIG00000011481	MSTRG.661791.3	0.85	1	4	1	novel_miR_9914
ENSPSIG00000011481	MSTRG.244210.7	0.98	1	2	1	novel_miR_9914
ENSPSIG00000011481	MSTRG.623523.7	0.86	1	1	1	novel_miR_9914
ENSPSIG00000011481	MSTRG.143035.1	0.96	1	2	1	novel_miR_9914
ENSPSIG00000011481	MSTRG.663879.2	0.89	1	1	1	novel_miR_9914
ENSPSIG00000011481	MSTRG.501157.3	0.99	1	1	1	novel_miR_9914
ENSPSIG00000011481	MSTRG.638440.1	0.89	1	1	1	novel_miR_9914
ENSPSIG00000011481	MSTRG.207450.2	0.84	1	1	1	novel_miR_9914
ENSPSIG00000011481	MSTRG.277921.1	0.81	1	1	1	novel_miR_9914
ENSPSIG00000011481	MSTRG.322132.6	0.84	1	1	1	novel_miR_9914
ENSPSIG00000011481	MSTRG.330132.1	0.95	1	2	1	novel_miR_9914
ENSPSIG00000011481	MSTRG.250126.6	0.81	1	1	1	novel_miR_9914
ENSPSIG00000011481	MSTRG.5704.3	0.87	1	1	1	novel_miR_9914
ENSPSIG00000011481	MSTRG.138919.11	0.84	1	2	1	novel_miR_9914
ENSPSIG00000011481	MSTRG.653732.6	0.99	1	4	1	novel_miR_9914
ENSPSIG00000011481	MSTRG.407955.29	0.95	1	1	1	novel_miR_9914
ENSPSIG00000011481	MSTRG.234775.2	0.83	1	1	1	novel_miR_9914
ENSPSIG00000011481	MSTRG.259064.1	0.84	1	1	1	novel_miR_9914
ENSPSIG00000011481	MSTRG.181068.1	0.9	1	6	1	novel_miR_9914
ENSPSIG00000011481	MSTRG.259949.1	0.95	1	3	1	novel_miR_9914
ENSPSIG00000011481	MSTRG.331858.1	0.91	1	1	1	novel_miR_9914
ENSPSIG00000011481	MSTRG.89955.7	0.94	1	1	1	novel_miR_9914
ENSPSIG00000011481	MSTRG.295423.3	0.84	1	1	1	novel_miR_9914
ENSPSIG00000011481	MSTRG.45966.1	0.98	1	1	1	novel_miR_9914
ENSPSIG00000011481	MSTRG.513142.1	0.83	1	2	1	novel_miR_9914
ENSPSIG00000011481	MSTRG.66701.2	0.97	1	2	1	novel_miR_9914
ENSPSIG00000005737	MSTRG.545289.1	0.86	1	4	1	novel_miR_10717
ENSPSIG00000005737	MSTRG.32310.2	0.94	1	1	1	novel_miR_10717
ENSPSIG00000005737	MSTRG.129760.3	0.93	1	1	1	novel_miR_10717
ENSPSIG00000005737	MSTRG.406735.1	0.96	1	1	1	novel_miR_10717
ENSPSIG00000005737	MSTRG.516614.23	1	1	3	1	novel_miR_10717
ENSPSIG00000005737	MSTRG.26657.2	0.88	1	1	1	novel_miR_10717
ENSPSIG00000005737	MSTRG.492648.1	0.86	1	1	1	novel_miR_10717
ENSPSIG00000005737	MSTRG.493576.1	0.93	1	1	1	novel_miR_10717
ENSPSIG00000005737	MSTRG.77229.1	0.83	1	4	1	novel_miR_10717
ENSPSIG00000005737	MSTRG.212470.1	0.97	1	1	1	novel_miR_10717
ENSPSIG00000005737	MSTRG.173746.2	0.81	1	1	1	novel_miR_10717
ENSPSIG00000005737	MSTRG.46019.1	0.91	1	1	1	novel_miR_10717
ENSPSIG00000005737	MSTRG.403423.11	0.89	1	1	1	novel_miR_10717
ENSPSIG00000005737	MSTRG.141182.1	0.95	1	2	1	novel_miR_10717
ENSPSIG00000005737	MSTRG.32310.4	0.9	1	1	1	novel_miR_10717
ENSPSIG00000005737	MSTRG.580957.1	0.94	1	3	1	novel_miR_10717
ENSPSIG00000005737	MSTRG.126225.1	0.98	1	5	1	novel_miR_10717
ENSPSIG00000005737	MSTRG.493576.3	0.83	1	1	1	novel_miR_10717
ENSPSIG00000005737	MSTRG.516614.22	0.93	1	2	1	novel_miR_10717
ENSPSIG00000005737	MSTRG.236764.7	0.91	1	1	1	novel_miR_10717
ENSPSIG00000005737	MSTRG.436926.1	0.83	1	2	1	novel_miR_10717
ENSPSIG00000005737	MSTRG.516614.25	0.97	1	2	1	novel_miR_10717
ENSPSIG00000005737	MSTRG.599325.1	0.94	1	4	1	novel_miR_10717
ENSPSIG00000005737	MSTRG.129760.8	0.91	1	1	1	novel_miR_10717
ENSPSIG00000005737	MSTRG.105187.1	0.94	1	2	1	novel_miR_10717
ENSPSIG00000005737	MSTRG.663588.1	0.98	1	1	1	novel_miR_10717
ENSPSIG00000015988	MSTRG.487237.1	0.83	1	2	1	novel_miR_10369
ENSPSIG00000015988	MSTRG.467057.3	0.81	1	1	1	novel_miR_10369
ENSPSIG00000006147	MSTRG.380892.17	0.93	1	1	1	novel_miR_6375
ENSPSIG00000006147	MSTRG.397785.2	0.93	1	3	1	novel_miR_6375
ENSPSIG00000006147	MSTRG.198109.2	0.91	1	1	1	novel_miR_6375
ENSPSIG00000006147	MSTRG.391036.3	0.98	1	2	1	novel_miR_6375
ENSPSIG00000006147	MSTRG.70055.6	0.9	1	1	1	novel_miR_6375
ENSPSIG00000006147	MSTRG.328981.2	0.92	1	1	1	novel_miR_6375
ENSPSIG00000006147	MSTRG.14756.8	0.97	1	4	1	novel_miR_6375
ENSPSIG00000006147	MSTRG.70055.3	0.87	1	1	1	novel_miR_6375
ENSPSIG00000006147	MSTRG.146098.9	0.85	1	1	1	novel_miR_6375
ENSPSIG00000006147	MSTRG.151843.8	0.91	1	2	1	novel_miR_6375
ENSPSIG00000006147	MSTRG.21853.2	0.84	1	1	1	novel_miR_6375
ENSPSIG00000006147	MSTRG.264778.1	0.9	1	1	1	novel_miR_6375
ENSPSIG00000006147	MSTRG.70055.1	0.84	1	1	1	novel_miR_6375
ENSPSIG00000006147	MSTRG.156994.1	0.97	1	1	1	novel_miR_6375
ENSPSIG00000006147	MSTRG.487922.21	0.88	1	1	1	novel_miR_6375
ENSPSIG00000006147	MSTRG.362773.3	0.87	1	3	1	novel_miR_6375
ENSPSIG00000006147	MSTRG.70055.4	0.97	1	1	1	novel_miR_6375
ENSPSIG00000006147	MSTRG.275157.4	0.97	1	1	1	novel_miR_6375
ENSPSIG00000006147	MSTRG.456506.1	0.98	1	1	1	novel_miR_6375
ENSPSIG00000006147	MSTRG.174150.1	0.82	1	5	1	novel_miR_6375
ENSPSIG00000006147	MSTRG.268637.3	0.96	1	1	1	novel_miR_6375
ENSPSIG00000006147	MSTRG.495896.1	0.93	1	2	1	novel_miR_6375
ENSPSIG00000006147	MSTRG.107171.2	0.92	1	2	1	novel_miR_6375
ENSPSIG00000006147	MSTRG.663006.1	0.83	1	1	1	novel_miR_6375
ENSPSIG00000006147	MSTRG.98261.5	0.88	1	1	1	novel_miR_6375
ENSPSIG00000006147	MSTRG.210258.1	0.94	1	1	1	novel_miR_6375
ENSPSIG00000006147	MSTRG.281029.1	0.94	1	2	1	novel_miR_6375
ENSPSIG00000006147	MSTRG.210639.1	0.89	1	1	1	novel_miR_6375
ENSPSIG00000006147	MSTRG.134028.3	0.86	1	1	1	novel_miR_6375
ENSPSIG00000006147	MSTRG.70055.7	0.91	1	1	1	novel_miR_6375
ENSPSIG00000006147	MSTRG.540906.12	0.82	1	1	1	novel_miR_6375
ENSPSIG00000006147	MSTRG.164742.1	0.87	1	1	1	novel_miR_6375
ENSPSIG00000006147	MSTRG.12208.1	0.84	1	1	1	novel_miR_6375
ENSPSIG00000006147	MSTRG.328981.1	0.82	1	1	1	novel_miR_6375
ENSPSIG00000006147	MSTRG.188811.1	0.97	1	2	1	novel_miR_6375
ENSPSIG00000006147	MSTRG.531823.45	0.96	1	2	1	novel_miR_6375
ENSPSIG00000006147	MSTRG.613019.15	0.85	1	1	1	novel_miR_6375
ENSPSIG00000006147	MSTRG.541968.1	0.94	1	3	1	novel_miR_6375
ENSPSIG00000006147	MSTRG.70055.8	0.88	1	1	1	novel_miR_6375
ENSPSIG00000006147	MSTRG.151843.10	0.89	1	2	1	novel_miR_6375
ENSPSIG00000006147	MSTRG.367433.1	0.99	1	3	1	novel_miR_6375
ENSPSIG00000006147	MSTRG.427448.1	0.91	1	2	1	novel_miR_6375
ENSPSIG00000006147	MSTRG.12208.2	0.91	1	1	1	novel_miR_6375
ENSPSIG00000006147	MSTRG.665792.1	0.85	1	3	1	novel_miR_6375
ENSPSIG00000006147	MSTRG.21853.5	0.95	1	1	1	novel_miR_6375
ENSPSIG00000006147	MSTRG.70055.5	0.94	1	1	1	novel_miR_6375
ENSPSIG00000006147	MSTRG.503093.6	0.99	1	1	1	novel_miR_6375
ENSPSIG00000006147	MSTRG.98261.1	0.9	1	1	1	novel_miR_6375
ENSPSIG00000011820	MSTRG.380892.17	0.98	1	1	1	novel_miR_6375
ENSPSIG00000011820	MSTRG.397785.2	0.82	1	3	1	novel_miR_6375
ENSPSIG00000011820	MSTRG.198109.2	0.95	1	1	1	novel_miR_6375
ENSPSIG00000011820	MSTRG.391036.3	0.97	1	2	1	novel_miR_6375
ENSPSIG00000011820	MSTRG.70055.6	0.87	1	1	1	novel_miR_6375
ENSPSIG00000011820	MSTRG.328981.2	0.93	1	1	1	novel_miR_6375
ENSPSIG00000011820	MSTRG.14756.8	0.95	1	4	1	novel_miR_6375
ENSPSIG00000011820	MSTRG.70055.3	0.92	1	1	1	novel_miR_6375
ENSPSIG00000011820	MSTRG.146098.9	0.89	1	1	1	novel_miR_6375
ENSPSIG00000011820	MSTRG.70055.1	0.9	1	1	1	novel_miR_6375
ENSPSIG00000011820	MSTRG.156994.1	0.94	1	1	1	novel_miR_6375
ENSPSIG00000011820	MSTRG.70055.4	0.98	1	1	1	novel_miR_6375
ENSPSIG00000011820	MSTRG.234632.1	0.88	1	1	1	novel_miR_6375
ENSPSIG00000011820	MSTRG.275157.4	0.97	1	1	1	novel_miR_6375
ENSPSIG00000011820	MSTRG.456506.1	0.93	1	1	1	novel_miR_6375
ENSPSIG00000011820	MSTRG.174150.1	0.82	1	5	1	novel_miR_6375
ENSPSIG00000011820	MSTRG.268637.3	0.9	1	1	1	novel_miR_6375
ENSPSIG00000011820	MSTRG.495896.1	0.93	1	2	1	novel_miR_6375
ENSPSIG00000011820	MSTRG.107171.2	0.83	1	2	1	novel_miR_6375
ENSPSIG00000011820	MSTRG.98261.5	0.96	1	1	1	novel_miR_6375
ENSPSIG00000011820	MSTRG.503093.8	0.82	1	1	1	novel_miR_6375
ENSPSIG00000011820	MSTRG.164203.11	0.8	1	1	1	novel_miR_6375
ENSPSIG00000011820	MSTRG.210258.1	0.93	1	1	1	novel_miR_6375
ENSPSIG00000011820	MSTRG.281029.1	0.95	1	2	1	novel_miR_6375
ENSPSIG00000011820	MSTRG.210639.1	0.93	1	1	1	novel_miR_6375
ENSPSIG00000011820	MSTRG.527909.4	0.9	1	1	1	novel_miR_6375
ENSPSIG00000011820	MSTRG.70055.7	0.85	1	1	1	novel_miR_6375
ENSPSIG00000011820	MSTRG.164742.1	0.94	1	1	1	novel_miR_6375
ENSPSIG00000011820	MSTRG.12208.1	0.96	1	1	1	novel_miR_6375
ENSPSIG00000011820	MSTRG.328981.1	0.88	1	1	1	novel_miR_6375
ENSPSIG00000011820	MSTRG.188811.1	0.94	1	2	1	novel_miR_6375
ENSPSIG00000011820	MSTRG.531823.45	0.98	1	2	1	novel_miR_6375
ENSPSIG00000011820	MSTRG.541968.1	0.99	1	3	1	novel_miR_6375
ENSPSIG00000011820	MSTRG.70055.8	0.8	1	1	1	novel_miR_6375
ENSPSIG00000011820	MSTRG.407860.1	0.9	1	7	1	novel_miR_6375
ENSPSIG00000011820	MSTRG.367433.1	0.95	1	3	1	novel_miR_6375
ENSPSIG00000011820	MSTRG.98261.4	0.81	1	1	1	novel_miR_6375
ENSPSIG00000011820	MSTRG.12208.2	0.84	1	1	1	novel_miR_6375
ENSPSIG00000011820	MSTRG.665792.1	0.89	1	3	1	novel_miR_6375
ENSPSIG00000011820	MSTRG.21853.5	0.9	1	1	1	novel_miR_6375
ENSPSIG00000011820	MSTRG.501157.6	0.88	1	2	1	novel_miR_6375
ENSPSIG00000011820	MSTRG.70055.5	0.86	1	1	1	novel_miR_6375
ENSPSIG00000011820	MSTRG.503093.6	0.95	1	1	1	novel_miR_6375
ENSPSIG00000011820	MSTRG.98261.1	0.94	1	1	1	novel_miR_6375
ENSPSIG00000009803	MSTRG.71049.8	0.86	1	2	1	novel_miR_1222
ENSPSIG00000009803	MSTRG.356033.2	0.89	1	3	1	novel_miR_1222
ENSPSIG00000009803	MSTRG.31210.2	0.8	1	1	1	novel_miR_1222
ENSPSIG00000009803	MSTRG.340179.1	0.99	1	1	1	novel_miR_1222
ENSPSIG00000009803	MSTRG.658619.2	0.96	1	1	1	novel_miR_1222
ENSPSIG00000009803	MSTRG.359973.1	0.84	1	1	1	novel_miR_1222
ENSPSIG00000009803	MSTRG.472123.2	0.92	1	2	1	novel_miR_1222
ENSPSIG00000009803	MSTRG.517102.1	0.84	1	5	1	novel_miR_1222
ENSPSIG00000009803	MSTRG.592162.7	0.97	1	1	1	novel_miR_1222
ENSPSIG00000009803	MSTRG.116104.1	0.95	1	1	1	novel_miR_1222
ENSPSIG00000009803	MSTRG.173512.1	0.82	1	1	1	novel_miR_1222
ENSPSIG00000009803	MSTRG.71506.2	0.87	1	3	1	novel_miR_1222
ENSPSIG00000009803	MSTRG.335622.2	0.82	1	2	1	novel_miR_1222
ENSPSIG00000009803	MSTRG.188817.3	0.99	1	5	1	novel_miR_1222
ENSPSIG00000009803	MSTRG.102076.2	0.88	1	1	1	novel_miR_1222
ENSPSIG00000009803	MSTRG.575606.1	0.92	1	1	1	novel_miR_1222
ENSPSIG00000009803	MSTRG.162146.3	0.91	1	7	1	novel_miR_1222
ENSPSIG00000009803	MSTRG.233312.9	0.92	1	1	1	novel_miR_1222
ENSPSIG00000009803	MSTRG.374635.1	0.92	1	1	1	novel_miR_1222
ENSPSIG00000009803	MSTRG.319496.1	0.89	1	5	1	novel_miR_1222
ENSPSIG00000009803	MSTRG.76993.1	0.84	1	3	1	novel_miR_1222
ENSPSIG00000009803	MSTRG.516805.6	0.87	1	1	1	novel_miR_1222
ENSPSIG00000009803	MSTRG.77482.1	0.84	1	1	1	novel_miR_1222
ENSPSIG00000009803	MSTRG.566826.1	0.95	1	3	1	novel_miR_1222
ENSPSIG00000009803	MSTRG.516805.4	0.84	1	1	1	novel_miR_1222
ENSPSIG00000009803	MSTRG.250853.1	0.91	1	1	1	novel_miR_1222
ENSPSIG00000009803	MSTRG.403539.35	0.96	1	1	1	novel_miR_1222
ENSPSIG00000009803	MSTRG.513201.1	0.92	1	1	1	novel_miR_1222
ENSPSIG00000009803	MSTRG.598987.1	0.96	1	1	1	novel_miR_1222
ENSPSIG00000009803	MSTRG.143736.7	0.83	1	3	1	novel_miR_1222
ENSPSIG00000009803	MSTRG.174191.1	0.95	1	3	1	novel_miR_1222
ENSPSIG00000009803	MSTRG.297764.1	0.9	1	1	1	novel_miR_1222
ENSPSIG00000009803	MSTRG.185694.1	0.91	1	1	1	novel_miR_1222
ENSPSIG00000009803	MSTRG.30117.3	0.93	1	1	1	novel_miR_1222
ENSPSIG00000009803	MSTRG.278638.3	0.84	1	1	1	novel_miR_1222
ENSPSIG00000009803	MSTRG.66998.4	0.86	1	4	1	novel_miR_1222
ENSPSIG00000009803	MSTRG.568196.1	0.9	1	1	1	novel_miR_1222
ENSPSIG00000009803	MSTRG.665786.3	0.92	1	1	1	novel_miR_1222
ENSPSIG00000009803	MSTRG.294027.2	0.87	1	2	1	novel_miR_1222
ENSPSIG00000009803	MSTRG.388572.2	0.81	1	1	1	novel_miR_1222
ENSPSIG00000009803	MSTRG.141508.2	0.88	1	2	1	novel_miR_1222
ENSPSIG00000009803	MSTRG.264227.3	0.93	1	3	1	novel_miR_1222
ENSPSIG00000009803	MSTRG.253773.9	0.93	1	2	1	novel_miR_1222
ENSPSIG00000009803	MSTRG.253773.10	0.96	1	2	1	novel_miR_1222
ENSPSIG00000009803	MSTRG.39575.2	0.86	1	1	1	novel_miR_1222
ENSPSIG00000009803	MSTRG.474438.1	0.89	1	1	1	novel_miR_1222
ENSPSIG00000009803	MSTRG.666646.1	0.88	1	6	1	novel_miR_1222
ENSPSIG00000009803	MSTRG.196778.1	0.93	1	1	1	novel_miR_1222
ENSPSIG00000008697	MSTRG.128957.7	0.96	1	1	1	novel_miR_365
ENSPSIG00000009507	MSTRG.15742.4	0.98	1	1	1	novel_miR_615
ENSPSIG00000009507	MSTRG.419467.5	0.97	1	1	1	novel_miR_615
ENSPSIG00000017461	MSTRG.177749.1	0.92	1	1	1	novel_miR_1236
ENSPSIG00000017461	MSTRG.185871.2	0.9	1	1	1	novel_miR_1236
ENSPSIG00000017461	MSTRG.513223.1	0.82	1	1	1	novel_miR_1236
ENSPSIG00000012766	MSTRG.500744.1	0.98	1	1	1	novel_miR_227
ENSPSIG00000012766	MSTRG.283396.1	0.88	1	3	1	novel_miR_227
ENSPSIG00000012766	MSTRG.409781.3	0.99	1	1	1	novel_miR_227
ENSPSIG00000012766	MSTRG.208720.1	0.81	1	1	1	novel_miR_227
ENSPSIG00000012766	MSTRG.625448.7	0.85	1	1	1	novel_miR_227
ENSPSIG00000012766	MSTRG.259224.2	0.92	1	1	1	novel_miR_227
ENSPSIG00000012766	MSTRG.169379.1	0.98	1	1	1	novel_miR_227
ENSPSIG00000012766	MSTRG.127836.14	0.98	1	1	1	novel_miR_227
ENSPSIG00000012766	MSTRG.428059.4	0.87	1	1	1	novel_miR_227
ENSPSIG00000012766	MSTRG.403288.1	0.83	1	1	1	novel_miR_227
ENSPSIG00000012766	MSTRG.166873.1	0.95	1	1	1	novel_miR_227
ENSPSIG00000012766	MSTRG.356258.2	0.98	1	1	1	novel_miR_227
ENSPSIG00000012766	MSTRG.242536.7	0.95	1	1	1	novel_miR_227
ENSPSIG00000012766	MSTRG.452940.1	0.9	1	1	1	novel_miR_227
ENSPSIG00000012766	MSTRG.296533.1	0.89	1	1	1	novel_miR_227
ENSPSIG00000012766	MSTRG.263965.3	0.93	1	1	1	novel_miR_227
ENSPSIG00000012766	MSTRG.273896.1	0.88	1	1	1	novel_miR_227
ENSPSIG00000012766	MSTRG.457845.11	0.89	1	2	1	novel_miR_227
ENSPSIG00000012766	MSTRG.37323.1	0.87	1	1	1	novel_miR_227
ENSPSIG00000012766	MSTRG.278530.6	0.97	1	1	1	novel_miR_227
ENSPSIG00000012766	MSTRG.95083.1	0.88	1	1	1	novel_miR_227
ENSPSIG00000012766	MSTRG.634345.5	0.92	1	1	1	novel_miR_227
ENSPSIG00000012766	MSTRG.33503.2	0.81	1	1	1	novel_miR_227
ENSPSIG00000012766	MSTRG.278676.1	0.81	1	1	1	novel_miR_227
ENSPSIG00000012766	MSTRG.483933.1	0.95	1	1	1	novel_miR_227
ENSPSIG00000012766	MSTRG.58023.1	0.86	1	1	1	novel_miR_227
ENSPSIG00000012766	MSTRG.263965.7	0.92	1	1	1	novel_miR_227
ENSPSIG00000012766	MSTRG.27373.1	1	1	1	1	novel_miR_227
ENSPSIG00000012766	MSTRG.312667.25	0.97	1	1	1	novel_miR_227
ENSPSIG00000012766	MSTRG.148807.11	0.92	1	1	1	novel_miR_227
ENSPSIG00000012766	MSTRG.592702.1	0.9	1	3	1	novel_miR_227
ENSPSIG00000012766	MSTRG.156316.11	0.94	1	1	1	novel_miR_227
ENSPSIG00000012766	MSTRG.429549.4	0.87	1	1	1	novel_miR_227
ENSPSIG00000012766	MSTRG.263965.1	0.97	1	1	1	novel_miR_227
ENSPSIG00000012766	MSTRG.360459.16	0.83	1	1	1	novel_miR_227
ENSPSIG00000012766	MSTRG.393475.1	0.85	1	4	1	novel_miR_227
ENSPSIG00000012766	MSTRG.625448.2	0.98	1	1	1	novel_miR_227
ENSPSIG00000012766	MSTRG.148807.4	0.83	1	1	1	novel_miR_227
ENSPSIG00000012766	MSTRG.277972.1	0.92	1	1	1	novel_miR_227
ENSPSIG00000012766	MSTRG.262656.1	0.9	1	3	1	novel_miR_227
ENSPSIG00000012766	MSTRG.186299.3	0.92	1	2	1	novel_miR_227
ENSPSIG00000012766	MSTRG.534466.4	0.92	1	1	1	novel_miR_227
ENSPSIG00000012766	MSTRG.210202.1	0.82	1	1	1	novel_miR_227
ENSPSIG00000012766	MSTRG.58432.2	0.9	1	1	1	novel_miR_227
ENSPSIG00000012766	MSTRG.660040.1	0.93	1	2	1	novel_miR_227
ENSPSIG00000012766	MSTRG.391877.1	0.96	1	1	1	novel_miR_227
ENSPSIG00000012766	MSTRG.317509.1	0.85	1	1	1	novel_miR_227
ENSPSIG00000012766	MSTRG.404420.1	0.84	1	1	1	novel_miR_227
ENSPSIG00000012766	MSTRG.250571.1	1	1	1	1	novel_miR_227
ENSPSIG00000012766	MSTRG.625448.3	0.93	1	1	1	novel_miR_227
ENSPSIG00000012766	MSTRG.148807.8	0.85	1	1	1	novel_miR_227
ENSPSIG00000012766	MSTRG.169379.2	0.96	1	1	1	novel_miR_227
ENSPSIG00000012766	MSTRG.263965.4	0.92	1	1	1	novel_miR_227
ENSPSIG00000012766	MSTRG.503102.1	0.84	1	2	1	novel_miR_227
ENSPSIG00000012766	MSTRG.263965.8	0.8	1	1	1	novel_miR_227
ENSPSIG00000012766	MSTRG.625448.4	0.91	1	1	1	novel_miR_227
ENSPSIG00000012766	MSTRG.371306.2	0.9	1	1	1	novel_miR_227
ENSPSIG00000012766	MSTRG.653510.9	0.81	1	7	1	novel_miR_227
ENSPSIG00000012766	MSTRG.45646.2	0.96	1	1	1	novel_miR_227
ENSPSIG00000012766	MSTRG.60113.9	0.97	1	4	1	novel_miR_227
ENSPSIG00000012766	MSTRG.201661.2	0.91	1	1	1	novel_miR_227
ENSPSIG00000012766	MSTRG.441600.2	0.97	1	2	1	novel_miR_227
ENSPSIG00000012766	MSTRG.463507.1	0.96	1	1	1	novel_miR_227
ENSPSIG00000012766	MSTRG.43134.1	0.97	1	1	1	novel_miR_227
ENSPSIG00000012766	MSTRG.148807.3	0.83	1	1	1	novel_miR_227
ENSPSIG00000012766	MSTRG.487922.2	0.9	1	2	1	novel_miR_227
ENSPSIG00000012766	MSTRG.58432.1	0.91	1	1	1	novel_miR_227
ENSPSIG00000012766	MSTRG.313942.24	0.87	1	2	1	novel_miR_227
ENSPSIG00000012766	MSTRG.28030.2	0.97	1	5	1	novel_miR_227
ENSPSIG00000012766	MSTRG.362909.1	0.94	1	1	1	novel_miR_227
ENSPSIG00000012766	MSTRG.263472.4	0.89	1	1	1	novel_miR_227
ENSPSIG00000012766	MSTRG.238718.1	0.94	1	1	1	novel_miR_227
ENSPSIG00000012766	MSTRG.201159.2	0.98	1	1	1	novel_miR_227
ENSPSIG00000012766	MSTRG.259224.3	0.9	1	1	1	novel_miR_227
ENSPSIG00000012766	MSTRG.656083.1	0.99	1	1	1	novel_miR_227
ENSPSIG00000012766	MSTRG.612996.1	0.97	1	2	1	novel_miR_227
ENSPSIG00000012766	MSTRG.22015.3	0.86	1	3	1	novel_miR_227
ENSPSIG00000012766	MSTRG.210822.5	0.94	1	1	1	novel_miR_227
ENSPSIG00000012766	MSTRG.631666.1	0.9	1	2	1	novel_miR_227
ENSPSIG00000012766	MSTRG.128681.2	0.9	1	3	1	novel_miR_227
ENSPSIG00000012766	MSTRG.534812.2	0.99	1	2	1	novel_miR_227
ENSPSIG00000012766	MSTRG.513485.1	0.88	1	3	1	novel_miR_227
ENSPSIG00000012766	MSTRG.259224.1	0.92	1	1	1	novel_miR_227
ENSPSIG00000012766	MSTRG.525268.28	0.85	1	1	1	novel_miR_227
ENSPSIG00000012766	MSTRG.148807.6	0.98	1	1	1	novel_miR_227
ENSPSIG00000012766	MSTRG.327025.1	0.89	1	2	1	novel_miR_227
ENSPSIG00000012766	MSTRG.346719.20	0.87	1	1	1	novel_miR_227
ENSPSIG00000012766	MSTRG.306303.2	0.98	1	2	1	novel_miR_227
ENSPSIG00000012766	MSTRG.496154.1	0.93	1	1	1	novel_miR_227
ENSPSIG00000012766	MSTRG.18629.15	0.98	1	1	1	novel_miR_227
ENSPSIG00000012766	MSTRG.585388.1	0.93	1	1	1	novel_miR_227
ENSPSIG00000012766	MSTRG.102541.1	0.99	1	3	1	novel_miR_227
ENSPSIG00000012766	MSTRG.635724.3	0.89	1	2	1	novel_miR_227
ENSPSIG00000012766	MSTRG.491024.1	0.98	1	1	1	novel_miR_227
ENSPSIG00000012766	MSTRG.97808.1	0.98	1	1	1	novel_miR_227
ENSPSIG00000012766	MSTRG.292878.15	0.97	1	8	1	novel_miR_227
ENSPSIG00000012766	MSTRG.98381.2	0.98	1	2	1	novel_miR_227
ENSPSIG00000012766	MSTRG.57543.10	0.92	1	3	1	novel_miR_227
ENSPSIG00000012766	MSTRG.263965.2	0.86	1	1	1	novel_miR_227
ENSPSIG00000012766	MSTRG.191786.1	0.89	1	2	1	novel_miR_227
ENSPSIG00000012766	MSTRG.278530.5	0.96	1	1	1	novel_miR_227
ENSPSIG00000012766	MSTRG.576177.1	0.83	1	1	1	novel_miR_227
ENSPSIG00000012766	MSTRG.635724.8	0.97	1	2	1	novel_miR_227
ENSPSIG00000012766	MSTRG.162316.1	0.93	1	1	1	novel_miR_227
ENSPSIG00000012766	MSTRG.389309.1	0.94	1	1	1	novel_miR_227
ENSPSIG00000012766	MSTRG.295353.2	0.85	1	1	1	novel_miR_227
ENSPSIG00000012766	MSTRG.175901.1	0.93	1	3	1	novel_miR_227
ENSPSIG00000012766	MSTRG.124208.5	0.97	1	2	1	novel_miR_227
ENSPSIG00000012766	MSTRG.367985.1	0.9	1	1	1	novel_miR_227
ENSPSIG00000012766	MSTRG.186299.1	0.99	1	1	1	novel_miR_227
ENSPSIG00000012766	MSTRG.442031.1	0.91	1	1	1	novel_miR_227
ENSPSIG00000013978	MSTRG.500744.1	0.95	1	1	1	novel_miR_227
ENSPSIG00000013978	MSTRG.283396.1	0.91	1	3	1	novel_miR_227
ENSPSIG00000013978	MSTRG.409781.3	0.98	1	1	1	novel_miR_227
ENSPSIG00000013978	MSTRG.432959.6	0.82	1	3	1	novel_miR_227
ENSPSIG00000013978	MSTRG.625448.7	0.9	1	1	1	novel_miR_227
ENSPSIG00000013978	MSTRG.259224.2	0.89	1	1	1	novel_miR_227
ENSPSIG00000013978	MSTRG.169379.1	0.99	1	1	1	novel_miR_227
ENSPSIG00000013978	MSTRG.127836.14	0.99	1	1	1	novel_miR_227
ENSPSIG00000013978	MSTRG.428059.4	0.9	1	1	1	novel_miR_227
ENSPSIG00000013978	MSTRG.403288.1	0.85	1	1	1	novel_miR_227
ENSPSIG00000013978	MSTRG.166873.1	0.91	1	1	1	novel_miR_227
ENSPSIG00000013978	MSTRG.356258.2	0.99	1	1	1	novel_miR_227
ENSPSIG00000013978	MSTRG.242536.7	0.97	1	1	1	novel_miR_227
ENSPSIG00000013978	MSTRG.452940.1	0.89	1	1	1	novel_miR_227
ENSPSIG00000013978	MSTRG.296533.1	0.85	1	1	1	novel_miR_227
ENSPSIG00000013978	MSTRG.263965.3	0.96	1	1	1	novel_miR_227
ENSPSIG00000013978	MSTRG.273896.1	0.9	1	1	1	novel_miR_227
ENSPSIG00000013978	MSTRG.457845.11	0.87	1	2	1	novel_miR_227
ENSPSIG00000013978	MSTRG.37323.1	0.88	1	1	1	novel_miR_227
ENSPSIG00000013978	MSTRG.278530.6	0.96	1	1	1	novel_miR_227
ENSPSIG00000013978	MSTRG.95083.1	0.85	1	1	1	novel_miR_227
ENSPSIG00000013978	MSTRG.634345.5	0.9	1	1	1	novel_miR_227
ENSPSIG00000013978	MSTRG.33503.2	0.84	1	1	1	novel_miR_227
ENSPSIG00000013978	MSTRG.483933.1	0.97	1	1	1	novel_miR_227
ENSPSIG00000013978	MSTRG.58023.1	0.88	1	1	1	novel_miR_227
ENSPSIG00000013978	MSTRG.263965.7	0.93	1	1	1	novel_miR_227
ENSPSIG00000013978	MSTRG.27373.1	0.98	1	1	1	novel_miR_227
ENSPSIG00000013978	MSTRG.312667.25	0.94	1	1	1	novel_miR_227
ENSPSIG00000013978	MSTRG.148807.11	0.96	1	1	1	novel_miR_227
ENSPSIG00000013978	MSTRG.592702.1	0.92	1	3	1	novel_miR_227
ENSPSIG00000013978	MSTRG.156316.11	0.94	1	1	1	novel_miR_227
ENSPSIG00000013978	MSTRG.429549.4	0.87	1	1	1	novel_miR_227
ENSPSIG00000013978	MSTRG.263965.1	0.97	1	1	1	novel_miR_227
ENSPSIG00000013978	MSTRG.360459.16	0.87	1	1	1	novel_miR_227
ENSPSIG00000013978	MSTRG.393475.1	0.83	1	4	1	novel_miR_227
ENSPSIG00000013978	MSTRG.625448.2	0.99	1	1	1	novel_miR_227
ENSPSIG00000013978	MSTRG.148807.4	0.86	1	1	1	novel_miR_227
ENSPSIG00000013978	MSTRG.277972.1	0.93	1	1	1	novel_miR_227
ENSPSIG00000013978	MSTRG.262656.1	0.93	1	3	1	novel_miR_227
ENSPSIG00000013978	MSTRG.186299.3	0.9	1	2	1	novel_miR_227
ENSPSIG00000013978	MSTRG.534466.4	0.88	1	1	1	novel_miR_227
ENSPSIG00000013978	MSTRG.58432.2	0.87	1	1	1	novel_miR_227
ENSPSIG00000013978	MSTRG.660040.1	0.96	1	2	1	novel_miR_227
ENSPSIG00000013978	MSTRG.391877.1	0.98	1	1	1	novel_miR_227
ENSPSIG00000013978	MSTRG.404420.1	0.81	1	1	1	novel_miR_227
ENSPSIG00000013978	MSTRG.250571.1	0.98	1	1	1	novel_miR_227
ENSPSIG00000013978	MSTRG.604332.2	0.83	1	1	1	novel_miR_227
ENSPSIG00000013978	MSTRG.625448.3	0.89	1	1	1	novel_miR_227
ENSPSIG00000013978	MSTRG.148807.8	0.9	1	1	1	novel_miR_227
ENSPSIG00000013978	MSTRG.169379.2	0.95	1	1	1	novel_miR_227
ENSPSIG00000013978	MSTRG.263965.4	0.94	1	1	1	novel_miR_227
ENSPSIG00000013978	MSTRG.503102.1	0.85	1	2	1	novel_miR_227
ENSPSIG00000013978	MSTRG.300464.8	0.81	1	1	1	novel_miR_227
ENSPSIG00000013978	MSTRG.625448.4	0.88	1	1	1	novel_miR_227
ENSPSIG00000013978	MSTRG.371306.2	0.9	1	1	1	novel_miR_227
ENSPSIG00000013978	MSTRG.45646.2	0.98	1	1	1	novel_miR_227
ENSPSIG00000013978	MSTRG.60113.9	0.99	1	4	1	novel_miR_227
ENSPSIG00000013978	MSTRG.201661.2	0.92	1	1	1	novel_miR_227
ENSPSIG00000013978	MSTRG.441600.2	0.99	1	2	1	novel_miR_227
ENSPSIG00000013978	MSTRG.463507.1	0.93	1	1	1	novel_miR_227
ENSPSIG00000013978	MSTRG.43134.1	0.94	1	1	1	novel_miR_227
ENSPSIG00000013978	MSTRG.148807.3	0.89	1	1	1	novel_miR_227
ENSPSIG00000013978	MSTRG.487922.2	0.92	1	2	1	novel_miR_227
ENSPSIG00000013978	MSTRG.308847.1	0.8	1	2	1	novel_miR_227
ENSPSIG00000013978	MSTRG.58432.1	0.88	1	1	1	novel_miR_227
ENSPSIG00000013978	MSTRG.313942.24	0.83	1	2	1	novel_miR_227
ENSPSIG00000013978	MSTRG.28030.2	0.97	1	5	1	novel_miR_227
ENSPSIG00000013978	MSTRG.362909.1	0.92	1	1	1	novel_miR_227
ENSPSIG00000013978	MSTRG.263472.4	0.84	1	1	1	novel_miR_227
ENSPSIG00000013978	MSTRG.238718.1	0.9	1	1	1	novel_miR_227
ENSPSIG00000013978	MSTRG.201159.2	0.96	1	1	1	novel_miR_227
ENSPSIG00000013978	MSTRG.259224.3	0.91	1	1	1	novel_miR_227
ENSPSIG00000013978	MSTRG.656083.1	0.98	1	1	1	novel_miR_227
ENSPSIG00000013978	MSTRG.612996.1	0.98	1	2	1	novel_miR_227
ENSPSIG00000013978	MSTRG.22015.3	0.85	1	3	1	novel_miR_227
ENSPSIG00000013978	MSTRG.210822.5	0.91	1	1	1	novel_miR_227
ENSPSIG00000013978	MSTRG.631666.1	0.92	1	2	1	novel_miR_227
ENSPSIG00000013978	MSTRG.128681.2	0.93	1	3	1	novel_miR_227
ENSPSIG00000013978	MSTRG.534812.2	1	1	2	1	novel_miR_227
ENSPSIG00000013978	MSTRG.513485.1	0.85	1	3	1	novel_miR_227
ENSPSIG00000013978	MSTRG.259224.1	0.95	1	1	1	novel_miR_227
ENSPSIG00000013978	MSTRG.148807.6	0.99	1	1	1	novel_miR_227
ENSPSIG00000013978	MSTRG.327025.1	0.83	1	2	1	novel_miR_227
ENSPSIG00000013978	MSTRG.346719.20	0.83	1	1	1	novel_miR_227
ENSPSIG00000013978	MSTRG.306303.2	0.96	1	2	1	novel_miR_227
ENSPSIG00000013978	MSTRG.496154.1	0.96	1	1	1	novel_miR_227
ENSPSIG00000013978	MSTRG.18629.15	0.96	1	1	1	novel_miR_227
ENSPSIG00000013978	MSTRG.585388.1	0.96	1	1	1	novel_miR_227
ENSPSIG00000013978	MSTRG.102541.1	0.99	1	3	1	novel_miR_227
ENSPSIG00000013978	MSTRG.635724.3	0.93	1	2	1	novel_miR_227
ENSPSIG00000013978	MSTRG.491024.1	0.96	1	1	1	novel_miR_227
ENSPSIG00000013978	MSTRG.97808.1	0.97	1	1	1	novel_miR_227
ENSPSIG00000013978	MSTRG.292878.15	0.93	1	8	1	novel_miR_227
ENSPSIG00000013978	MSTRG.98381.2	0.96	1	2	1	novel_miR_227
ENSPSIG00000013978	MSTRG.57543.10	0.87	1	3	1	novel_miR_227
ENSPSIG00000013978	MSTRG.263965.2	0.91	1	1	1	novel_miR_227
ENSPSIG00000013978	MSTRG.191786.1	0.84	1	2	1	novel_miR_227
ENSPSIG00000013978	MSTRG.278530.5	0.93	1	1	1	novel_miR_227
ENSPSIG00000013978	MSTRG.576177.1	0.88	1	1	1	novel_miR_227
ENSPSIG00000013978	MSTRG.635724.8	0.97	1	2	1	novel_miR_227
ENSPSIG00000013978	MSTRG.162316.1	0.9	1	1	1	novel_miR_227
ENSPSIG00000013978	MSTRG.389309.1	0.95	1	1	1	novel_miR_227
ENSPSIG00000013978	MSTRG.295353.2	0.84	1	1	1	novel_miR_227
ENSPSIG00000013978	MSTRG.175901.1	0.91	1	3	1	novel_miR_227
ENSPSIG00000013978	MSTRG.124208.5	0.99	1	2	1	novel_miR_227
ENSPSIG00000013978	MSTRG.367985.1	0.86	1	1	1	novel_miR_227
ENSPSIG00000013978	MSTRG.186299.1	0.98	1	1	1	novel_miR_227
ENSPSIG00000013978	MSTRG.442031.1	0.92	1	1	1	novel_miR_227
ENSPSIG00000005697	MSTRG.205931.1	0.87	1	1	1	novel_miR_9914
ENSPSIG00000005697	MSTRG.501157.4	0.83	1	1	1	novel_miR_9914
ENSPSIG00000005697	MSTRG.565504.10	0.91	1	3	1	novel_miR_9914
ENSPSIG00000005697	MSTRG.314133.4	0.88	1	2	1	novel_miR_9914
ENSPSIG00000005697	MSTRG.513020.1	0.94	1	1	1	novel_miR_9914
ENSPSIG00000005697	MSTRG.498963.1	0.93	1	1	1	novel_miR_9914
ENSPSIG00000005697	MSTRG.512101.4	0.89	1	13	1	novel_miR_9914
ENSPSIG00000005697	MSTRG.651643.1	0.88	1	6	1	novel_miR_9914
ENSPSIG00000005697	MSTRG.247901.1	0.99	1	3	1	novel_miR_9914
ENSPSIG00000005697	MSTRG.630720.1	0.84	1	2	1	novel_miR_9914
ENSPSIG00000005697	MSTRG.501157.1	0.83	1	1	1	novel_miR_9914
ENSPSIG00000005697	MSTRG.247901.14	0.92	1	3	1	novel_miR_9914
ENSPSIG00000005697	MSTRG.30243.1	0.98	1	1	1	novel_miR_9914
ENSPSIG00000005697	MSTRG.570313.1	0.89	1	1	1	novel_miR_9914
ENSPSIG00000005697	MSTRG.126571.1	0.97	1	4	1	novel_miR_9914
ENSPSIG00000005697	MSTRG.277921.5	0.91	1	1	1	novel_miR_9914
ENSPSIG00000005697	MSTRG.434588.1	0.95	1	3	1	novel_miR_9914
ENSPSIG00000005697	MSTRG.623523.8	0.86	1	1	1	novel_miR_9914
ENSPSIG00000005697	MSTRG.273468.5	0.86	1	2	1	novel_miR_9914
ENSPSIG00000005697	MSTRG.326652.1	0.93	1	5	1	novel_miR_9914
ENSPSIG00000005697	MSTRG.235518.3	0.99	1	1	1	novel_miR_9914
ENSPSIG00000005697	MSTRG.98381.3	0.86	1	1	1	novel_miR_9914
ENSPSIG00000005697	MSTRG.322132.1	0.82	1	1	1	novel_miR_9914
ENSPSIG00000005697	MSTRG.128949.4	0.85	1	3	1	novel_miR_9914
ENSPSIG00000005697	MSTRG.273468.7	0.86	1	1	1	novel_miR_9914
ENSPSIG00000005697	MSTRG.571642.1	0.9	1	1	1	novel_miR_9914
ENSPSIG00000005697	MSTRG.50332.1	0.98	1	1	1	novel_miR_9914
ENSPSIG00000005697	MSTRG.283214.1	0.93	1	1	1	novel_miR_9914
ENSPSIG00000005697	MSTRG.498963.2	0.98	1	1	1	novel_miR_9914
ENSPSIG00000005697	MSTRG.638440.4	0.87	1	1	1	novel_miR_9914
ENSPSIG00000005697	MSTRG.611117.1	0.81	1	4	1	novel_miR_9914
ENSPSIG00000005697	MSTRG.169989.6	0.82	1	1	1	novel_miR_9914
ENSPSIG00000005697	MSTRG.223055.4	0.98	1	2	1	novel_miR_9914
ENSPSIG00000005697	MSTRG.66988.1	0.85	1	4	1	novel_miR_9914
ENSPSIG00000005697	MSTRG.237302.29	0.86	1	1	1	novel_miR_9914
ENSPSIG00000005697	MSTRG.605309.2	0.91	1	1	1	novel_miR_9914
ENSPSIG00000005697	MSTRG.59353.1	0.9	1	3	1	novel_miR_9914
ENSPSIG00000005697	MSTRG.138919.9	0.81	1	1	1	novel_miR_9914
ENSPSIG00000005697	MSTRG.126571.2	0.96	1	4	1	novel_miR_9914
ENSPSIG00000005697	MSTRG.454471.2	0.97	1	1	1	novel_miR_9914
ENSPSIG00000005697	MSTRG.166226.2	0.98	1	1	1	novel_miR_9914
ENSPSIG00000005697	MSTRG.244210.1	0.94	1	2	1	novel_miR_9914
ENSPSIG00000005697	MSTRG.659641.4	0.9	1	1	1	novel_miR_9914
ENSPSIG00000005697	MSTRG.238076.1	0.87	1	2	1	novel_miR_9914
ENSPSIG00000005697	MSTRG.277921.9	0.88	1	1	1	novel_miR_9914
ENSPSIG00000005697	MSTRG.131588.1	0.98	1	3	1	novel_miR_9914
ENSPSIG00000005697	MSTRG.277921.7	0.99	1	2	1	novel_miR_9914
ENSPSIG00000005697	MSTRG.166226.3	0.84	1	1	1	novel_miR_9914
ENSPSIG00000005697	MSTRG.594884.2	0.98	1	4	1	novel_miR_9914
ENSPSIG00000005697	MSTRG.417.4	0.82	1	2	1	novel_miR_9914
ENSPSIG00000005697	MSTRG.573038.1	0.92	1	1	1	novel_miR_9914
ENSPSIG00000005697	MSTRG.468977.1	0.96	1	6	1	novel_miR_9914
ENSPSIG00000005697	MSTRG.244210.7	0.98	1	2	1	novel_miR_9914
ENSPSIG00000005697	MSTRG.623523.7	0.9	1	1	1	novel_miR_9914
ENSPSIG00000005697	MSTRG.143035.1	0.97	1	2	1	novel_miR_9914
ENSPSIG00000005697	MSTRG.35171.1	0.82	1	5	1	novel_miR_9914
ENSPSIG00000005697	MSTRG.663879.2	0.93	1	1	1	novel_miR_9914
ENSPSIG00000005697	MSTRG.501157.3	0.96	1	1	1	novel_miR_9914
ENSPSIG00000005697	MSTRG.289069.1	0.83	1	1	1	novel_miR_9914
ENSPSIG00000005697	MSTRG.638440.1	0.93	1	1	1	novel_miR_9914
ENSPSIG00000005697	MSTRG.277921.1	0.87	1	1	1	novel_miR_9914
ENSPSIG00000005697	MSTRG.322132.6	0.88	1	1	1	novel_miR_9914
ENSPSIG00000005697	MSTRG.65133.1	0.81	1	1	1	novel_miR_9914
ENSPSIG00000005697	MSTRG.330132.1	0.92	1	2	1	novel_miR_9914
ENSPSIG00000005697	MSTRG.5704.3	0.87	1	1	1	novel_miR_9914
ENSPSIG00000005697	MSTRG.653732.6	0.97	1	4	1	novel_miR_9914
ENSPSIG00000005697	MSTRG.407955.29	0.98	1	1	1	novel_miR_9914
ENSPSIG00000005697	MSTRG.18134.3	0.86	1	2	1	novel_miR_9914
ENSPSIG00000005697	MSTRG.457617.1	0.84	1	1	1	novel_miR_9914
ENSPSIG00000005697	MSTRG.234775.2	0.83	1	1	1	novel_miR_9914
ENSPSIG00000005697	MSTRG.501157.7	0.8	1	1	1	novel_miR_9914
ENSPSIG00000005697	MSTRG.259064.1	0.9	1	1	1	novel_miR_9914
ENSPSIG00000005697	MSTRG.181068.1	0.85	1	6	1	novel_miR_9914
ENSPSIG00000005697	MSTRG.259949.1	0.98	1	3	1	novel_miR_9914
ENSPSIG00000005697	MSTRG.322132.3	0.84	1	1	1	novel_miR_9914
ENSPSIG00000005697	MSTRG.331858.1	0.88	1	1	1	novel_miR_9914
ENSPSIG00000005697	MSTRG.89955.7	0.94	1	1	1	novel_miR_9914
ENSPSIG00000005697	MSTRG.295423.3	0.89	1	1	1	novel_miR_9914
ENSPSIG00000005697	MSTRG.45966.1	0.95	1	1	1	novel_miR_9914
ENSPSIG00000005697	MSTRG.513142.1	0.83	1	2	1	novel_miR_9914
ENSPSIG00000005697	MSTRG.66701.2	0.94	1	2	1	novel_miR_9914
ENSPSIG00000007717	MSTRG.443714.1	1	1	7	1	novel_miR_7406
ENSPSIG00000007717	MSTRG.625185.1	0.94	1	1	1	novel_miR_7406
ENSPSIG00000007717	MSTRG.451216.2	0.86	1	1	1	novel_miR_7406
ENSPSIG00000007717	MSTRG.629134.1	0.81	1	2	1	novel_miR_7406
ENSPSIG00000007717	MSTRG.439459.4	0.98	1	1	1	novel_miR_7406
ENSPSIG00000007717	MSTRG.542826.1	0.83	1	1	1	novel_miR_7406
ENSPSIG00000007717	MSTRG.503483.1	0.83	1	1	1	novel_miR_7406
ENSPSIG00000007717	MSTRG.441126.13	0.95	1	1	1	novel_miR_7406
ENSPSIG00000007717	MSTRG.285986.1	0.82	1	1	1	novel_miR_7406
ENSPSIG00000007717	MSTRG.422304.1	0.87	1	3	1	novel_miR_7406
ENSPSIG00000007717	MSTRG.260629.1	0.96	1	1	1	novel_miR_7406
ENSPSIG00000007717	MSTRG.439459.3	0.87	1	1	1	novel_miR_7406
ENSPSIG00000007717	MSTRG.292437.3	0.91	1	1	1	novel_miR_7406
ENSPSIG00000007717	MSTRG.439459.1	0.91	1	1	1	novel_miR_7406
ENSPSIG00000007717	MSTRG.145761.2	0.82	1	1	1	novel_miR_7406
ENSPSIG00000007717	MSTRG.331587.1	0.93	1	3	1	novel_miR_7406
ENSPSIG00000007717	MSTRG.659447.1	0.89	1	3	1	novel_miR_7406
ENSPSIG00000007717	MSTRG.25622.1	0.88	1	1	1	novel_miR_7406
ENSPSIG00000003235	MSTRG.205931.1	0.85	1	1	1	novel_miR_9914
ENSPSIG00000003235	MSTRG.565504.10	0.86	1	3	1	novel_miR_9914
ENSPSIG00000003235	MSTRG.314133.4	0.86	1	2	1	novel_miR_9914
ENSPSIG00000003235	MSTRG.513020.1	0.91	1	1	1	novel_miR_9914
ENSPSIG00000003235	MSTRG.498963.1	0.92	1	1	1	novel_miR_9914
ENSPSIG00000003235	MSTRG.512101.4	0.86	1	13	1	novel_miR_9914
ENSPSIG00000003235	MSTRG.651643.1	0.82	1	6	1	novel_miR_9914
ENSPSIG00000003235	MSTRG.247901.1	0.99	1	3	1	novel_miR_9914
ENSPSIG00000003235	MSTRG.630720.1	0.82	1	2	1	novel_miR_9914
ENSPSIG00000003235	MSTRG.247901.14	0.9	1	3	1	novel_miR_9914
ENSPSIG00000003235	MSTRG.30243.1	0.99	1	1	1	novel_miR_9914
ENSPSIG00000003235	MSTRG.570313.1	0.88	1	1	1	novel_miR_9914
ENSPSIG00000003235	MSTRG.126571.1	0.99	1	4	1	novel_miR_9914
ENSPSIG00000003235	MSTRG.277921.5	0.96	1	1	1	novel_miR_9914
ENSPSIG00000003235	MSTRG.434588.1	0.94	1	3	1	novel_miR_9914
ENSPSIG00000003235	MSTRG.623523.8	0.87	1	1	1	novel_miR_9914
ENSPSIG00000003235	MSTRG.436942.9	0.83	1	1	1	novel_miR_9914
ENSPSIG00000003235	MSTRG.326652.1	0.93	1	5	1	novel_miR_9914
ENSPSIG00000003235	MSTRG.168465.1	0.84	1	1	1	novel_miR_9914
ENSPSIG00000003235	MSTRG.235518.3	0.98	1	1	1	novel_miR_9914
ENSPSIG00000003235	MSTRG.98381.3	0.81	1	1	1	novel_miR_9914
ENSPSIG00000003235	MSTRG.128949.4	0.88	1	3	1	novel_miR_9914
ENSPSIG00000003235	MSTRG.273468.7	0.91	1	1	1	novel_miR_9914
ENSPSIG00000003235	MSTRG.571642.1	0.89	1	1	1	novel_miR_9914
ENSPSIG00000003235	MSTRG.50332.1	0.98	1	1	1	novel_miR_9914
ENSPSIG00000003235	MSTRG.283214.1	0.91	1	1	1	novel_miR_9914
ENSPSIG00000003235	MSTRG.498963.2	0.99	1	1	1	novel_miR_9914
ENSPSIG00000003235	MSTRG.638440.4	0.81	1	1	1	novel_miR_9914
ENSPSIG00000003235	MSTRG.169989.6	0.82	1	1	1	novel_miR_9914
ENSPSIG00000003235	MSTRG.223055.4	0.97	1	2	1	novel_miR_9914
ENSPSIG00000003235	MSTRG.237302.29	0.85	1	1	1	novel_miR_9914
ENSPSIG00000003235	MSTRG.605309.2	0.87	1	1	1	novel_miR_9914
ENSPSIG00000003235	MSTRG.59353.1	0.89	1	3	1	novel_miR_9914
ENSPSIG00000003235	MSTRG.126571.2	0.98	1	4	1	novel_miR_9914
ENSPSIG00000003235	MSTRG.454471.2	0.99	1	1	1	novel_miR_9914
ENSPSIG00000003235	MSTRG.166226.2	0.95	1	1	1	novel_miR_9914
ENSPSIG00000003235	MSTRG.244210.1	0.89	1	2	1	novel_miR_9914
ENSPSIG00000003235	MSTRG.659641.4	0.88	1	1	1	novel_miR_9914
ENSPSIG00000003235	MSTRG.238076.1	0.89	1	2	1	novel_miR_9914
ENSPSIG00000003235	MSTRG.277921.9	0.93	1	1	1	novel_miR_9914
ENSPSIG00000003235	MSTRG.131588.1	0.96	1	3	1	novel_miR_9914
ENSPSIG00000003235	MSTRG.277921.7	0.99	1	2	1	novel_miR_9914
ENSPSIG00000003235	MSTRG.594884.2	0.95	1	4	1	novel_miR_9914
ENSPSIG00000003235	MSTRG.417.4	0.83	1	2	1	novel_miR_9914
ENSPSIG00000003235	MSTRG.573038.1	0.91	1	1	1	novel_miR_9914
ENSPSIG00000003235	MSTRG.468977.1	0.93	1	6	1	novel_miR_9914
ENSPSIG00000003235	MSTRG.244210.7	0.97	1	2	1	novel_miR_9914
ENSPSIG00000003235	MSTRG.623523.7	0.94	1	1	1	novel_miR_9914
ENSPSIG00000003235	MSTRG.143035.1	0.96	1	2	1	novel_miR_9914
ENSPSIG00000003235	MSTRG.35171.1	0.87	1	5	1	novel_miR_9914
ENSPSIG00000003235	MSTRG.663879.2	0.9	1	1	1	novel_miR_9914
ENSPSIG00000003235	MSTRG.501157.3	0.95	1	1	1	novel_miR_9914
ENSPSIG00000003235	MSTRG.289069.1	0.87	1	1	1	novel_miR_9914
ENSPSIG00000003235	MSTRG.638440.1	0.96	1	1	1	novel_miR_9914
ENSPSIG00000003235	MSTRG.277921.1	0.88	1	1	1	novel_miR_9914
ENSPSIG00000003235	MSTRG.322132.6	0.83	1	1	1	novel_miR_9914
ENSPSIG00000003235	MSTRG.65133.1	0.85	1	1	1	novel_miR_9914
ENSPSIG00000003235	MSTRG.330132.1	0.87	1	2	1	novel_miR_9914
ENSPSIG00000003235	MSTRG.148380.4	0.84	1	2	1	novel_miR_9914
ENSPSIG00000003235	MSTRG.653732.6	0.96	1	4	1	novel_miR_9914
ENSPSIG00000003235	MSTRG.407955.29	0.95	1	1	1	novel_miR_9914
ENSPSIG00000003235	MSTRG.18134.3	0.88	1	2	1	novel_miR_9914
ENSPSIG00000003235	MSTRG.501157.7	0.88	1	1	1	novel_miR_9914
ENSPSIG00000003235	MSTRG.259064.1	0.9	1	1	1	novel_miR_9914
ENSPSIG00000003235	MSTRG.289069.2	0.83	1	1	1	novel_miR_9914
ENSPSIG00000003235	MSTRG.259949.1	0.98	1	3	1	novel_miR_9914
ENSPSIG00000003235	MSTRG.322132.3	0.81	1	1	1	novel_miR_9914
ENSPSIG00000003235	MSTRG.331858.1	0.92	1	1	1	novel_miR_9914
ENSPSIG00000003235	MSTRG.89955.7	0.98	1	1	1	novel_miR_9914
ENSPSIG00000003235	MSTRG.295423.3	0.92	1	1	1	novel_miR_9914
ENSPSIG00000003235	MSTRG.45966.1	0.96	1	1	1	novel_miR_9914
ENSPSIG00000003235	MSTRG.513142.1	0.89	1	2	1	novel_miR_9914
ENSPSIG00000003235	MSTRG.66701.2	0.95	1	2	1	novel_miR_9914
ENSPSIG00000006144	MSTRG.47787.8	0.98	1	1	1	novel_miR_4524
ENSPSIG00000006144	MSTRG.71049.3	1	1	2	1	novel_miR_4524
ENSPSIG00000006144	MSTRG.542933.1	0.88	1	1	1	novel_miR_4524
ENSPSIG00000006144	MSTRG.47787.1	0.82	1	1	1	novel_miR_4524
ENSPSIG00000006144	MSTRG.6805.5	0.88	1	1	1	novel_miR_4524
ENSPSIG00000006144	MSTRG.88634.1	0.84	1	1	1	novel_miR_4524
ENSPSIG00000006144	MSTRG.278043.2	0.92	1	1	1	novel_miR_4524
ENSPSIG00000006144	MSTRG.292303.2	0.88	1	1	1	novel_miR_4524
ENSPSIG00000006144	MSTRG.6805.2	0.82	1	1	1	novel_miR_4524
ENSPSIG00000006144	MSTRG.278043.1	0.82	1	1	1	novel_miR_4524
ENSPSIG00000006144	MSTRG.635846.1	0.96	1	2	1	novel_miR_4524
ENSPSIG00000006144	MSTRG.404597.1	0.8	1	1	1	novel_miR_4524
ENSPSIG00000006144	MSTRG.33916.3	0.98	1	1	1	novel_miR_4524
ENSPSIG00000006144	MSTRG.69845.1	0.91	1	1	1	novel_miR_4524
ENSPSIG00000006144	MSTRG.408882.1	0.92	1	3	1	novel_miR_4524
ENSPSIG00000006144	MSTRG.294027.1	0.97	1	2	1	novel_miR_4524
ENSPSIG00000006144	MSTRG.6805.3	0.83	1	1	1	novel_miR_4524
ENSPSIG00000006144	MSTRG.13683.1	0.95	1	1	1	novel_miR_4524
ENSPSIG00000009995	MSTRG.639506.3	0.95	1	1	1	novel_miR_9819
ENSPSIG00000009995	MSTRG.232472.1	0.9	1	1	1	novel_miR_9819
ENSPSIG00000009995	MSTRG.639506.1	0.98	1	1	1	novel_miR_9819
ENSPSIG00000009995	MSTRG.272034.2	0.95	1	2	1	novel_miR_9819
ENSPSIG00000009995	MSTRG.429098.1	0.93	1	1	1	novel_miR_9819
ENSPSIG00000009995	MSTRG.38398.1	0.98	1	1	1	novel_miR_9819
ENSPSIG00000009995	MSTRG.381395.1	0.92	1	1	1	novel_miR_9819
ENSPSIG00000009995	MSTRG.238824.2	0.97	1	1	1	novel_miR_9819
ENSPSIG00000009995	MSTRG.540112.1	1	1	1	1	novel_miR_9819
ENSPSIG00000009995	MSTRG.636018.1	0.97	1	3	1	novel_miR_9819
ENSPSIG00000009995	MSTRG.381381.11	0.87	1	3	1	novel_miR_9819
ENSPSIG00000013800	MSTRG.88287.1	0.86	1	1	1	novel_miR_5455
ENSPSIG00000012598	MSTRG.359331.1	0.96	1	1	1	novel_miR_9691
ENSPSIG00000012598	MSTRG.659436.2	0.99	1	1	1	novel_miR_9691
ENSPSIG00000012598	MSTRG.291415.3	0.99	1	1	1	novel_miR_9691
ENSPSIG00000012598	MSTRG.659436.1	0.87	1	1	1	novel_miR_9691
ENSPSIG00000002394	MSTRG.293225.1	0.97	1	3	1	novel_miR_6129
ENSPSIG00000002394	MSTRG.581855.1	0.96	1	1	1	novel_miR_6129
ENSPSIG00000014657	MSTRG.365891.1	0.95	1	5	1	novel_miR_9516
ENSPSIG00000014657	MSTRG.158961.1	0.94	1	3	1	novel_miR_9516
ENSPSIG00000014657	MSTRG.456189.1	0.99	1	10	1	novel_miR_9516
ENSPSIG00000010348	MSTRG.646647.1	0.99	1	3	1	novel_miR_6429
ENSPSIG00000010348	MSTRG.414994.2	0.8	1	2	1	novel_miR_6429
ENSPSIG00000010348	MSTRG.604655.2	0.92	1	2	1	novel_miR_6429
ENSPSIG00000010348	MSTRG.580994.1	0.89	1	3	1	novel_miR_6429
ENSPSIG00000010348	MSTRG.22755.12	0.86	1	1	1	novel_miR_6429
ENSPSIG00000010348	MSTRG.174692.2	0.93	1	1	1	novel_miR_6429
ENSPSIG00000010348	MSTRG.618530.2	0.84	1	1	1	novel_miR_6429
ENSPSIG00000010348	MSTRG.563600.1	0.81	1	2	1	novel_miR_6429
ENSPSIG00000010348	MSTRG.46384.1	0.93	1	2	1	novel_miR_6429
ENSPSIG00000010348	MSTRG.513201.3	0.97	1	1	1	novel_miR_6429
ENSPSIG00000010348	MSTRG.292482.1	0.97	1	3	1	novel_miR_6429
ENSPSIG00000010348	MSTRG.519712.1	0.89	1	1	1	novel_miR_6429
ENSPSIG00000010348	MSTRG.96931.7	0.88	1	2	1	novel_miR_6429
ENSPSIG00000010348	MSTRG.471604.1	0.93	1	1	1	novel_miR_6429
ENSPSIG00000010348	MSTRG.163626.5	0.83	1	1	1	novel_miR_6429
ENSPSIG00000007077	MSTRG.71049.8	0.82	1	2	1	novel_miR_1222
ENSPSIG00000007077	MSTRG.356033.2	0.99	1	3	1	novel_miR_1222
ENSPSIG00000007077	MSTRG.31210.2	0.81	1	1	1	novel_miR_1222
ENSPSIG00000007077	MSTRG.388572.1	0.85	1	1	1	novel_miR_1222
ENSPSIG00000007077	MSTRG.340179.1	0.98	1	1	1	novel_miR_1222
ENSPSIG00000007077	MSTRG.658619.2	0.99	1	1	1	novel_miR_1222
ENSPSIG00000007077	MSTRG.359973.1	0.87	1	1	1	novel_miR_1222
ENSPSIG00000007077	MSTRG.472123.2	0.97	1	2	1	novel_miR_1222
ENSPSIG00000007077	MSTRG.517102.1	0.93	1	5	1	novel_miR_1222
ENSPSIG00000007077	MSTRG.592162.7	0.84	1	1	1	novel_miR_1222
ENSPSIG00000007077	MSTRG.116104.1	0.84	1	1	1	novel_miR_1222
ENSPSIG00000007077	MSTRG.664208.4	0.91	1	1	1	novel_miR_1222
ENSPSIG00000007077	MSTRG.71506.2	0.98	1	3	1	novel_miR_1222
ENSPSIG00000007077	MSTRG.233312.10	0.93	1	1	1	novel_miR_1222
ENSPSIG00000007077	MSTRG.335622.2	0.93	1	2	1	novel_miR_1222
ENSPSIG00000007077	MSTRG.188817.3	0.95	1	5	1	novel_miR_1222
ENSPSIG00000007077	MSTRG.164457.10	0.88	1	1	1	novel_miR_1222
ENSPSIG00000007077	MSTRG.102076.2	0.95	1	1	1	novel_miR_1222
ENSPSIG00000007077	MSTRG.575606.1	0.96	1	1	1	novel_miR_1222
ENSPSIG00000007077	MSTRG.162146.3	0.85	1	7	1	novel_miR_1222
ENSPSIG00000007077	MSTRG.374635.1	0.95	1	1	1	novel_miR_1222
ENSPSIG00000007077	MSTRG.319496.1	0.94	1	5	1	novel_miR_1222
ENSPSIG00000007077	MSTRG.76993.1	0.82	1	3	1	novel_miR_1222
ENSPSIG00000007077	MSTRG.403539.28	0.92	1	1	1	novel_miR_1222
ENSPSIG00000007077	MSTRG.516805.6	0.94	1	1	1	novel_miR_1222
ENSPSIG00000007077	MSTRG.77482.1	0.94	1	1	1	novel_miR_1222
ENSPSIG00000007077	MSTRG.566826.1	0.95	1	3	1	novel_miR_1222
ENSPSIG00000007077	MSTRG.249108.8	0.84	1	1	1	novel_miR_1222
ENSPSIG00000007077	MSTRG.41915.2	0.81	1	6	1	novel_miR_1222
ENSPSIG00000007077	MSTRG.250853.1	0.97	1	1	1	novel_miR_1222
ENSPSIG00000007077	MSTRG.403539.35	0.86	1	1	1	novel_miR_1222
ENSPSIG00000007077	MSTRG.84138.2	0.86	1	1	1	novel_miR_1222
ENSPSIG00000007077	MSTRG.598987.1	0.95	1	1	1	novel_miR_1222
ENSPSIG00000007077	MSTRG.143736.7	0.87	1	3	1	novel_miR_1222
ENSPSIG00000007077	MSTRG.174191.1	0.86	1	3	1	novel_miR_1222
ENSPSIG00000007077	MSTRG.185694.1	0.99	1	1	1	novel_miR_1222
ENSPSIG00000007077	MSTRG.30117.3	0.91	1	1	1	novel_miR_1222
ENSPSIG00000007077	MSTRG.278638.3	0.85	1	1	1	novel_miR_1222
ENSPSIG00000007077	MSTRG.71049.5	0.89	1	2	1	novel_miR_1222
ENSPSIG00000007077	MSTRG.39575.1	0.8	1	1	1	novel_miR_1222
ENSPSIG00000007077	MSTRG.66998.4	0.95	1	4	1	novel_miR_1222
ENSPSIG00000007077	MSTRG.568196.1	0.98	1	1	1	novel_miR_1222
ENSPSIG00000007077	MSTRG.15982.3	0.81	1	1	1	novel_miR_1222
ENSPSIG00000007077	MSTRG.440766.1	0.86	1	1	1	novel_miR_1222
ENSPSIG00000007077	MSTRG.665786.3	0.98	1	1	1	novel_miR_1222
ENSPSIG00000007077	MSTRG.294027.2	0.97	1	2	1	novel_miR_1222
ENSPSIG00000007077	MSTRG.388572.2	0.94	1	1	1	novel_miR_1222
ENSPSIG00000007077	MSTRG.304975.5	0.91	1	2	1	novel_miR_1222
ENSPSIG00000007077	MSTRG.264227.3	0.94	1	3	1	novel_miR_1222
ENSPSIG00000007077	MSTRG.314374.1	0.86	1	1	1	novel_miR_1222
ENSPSIG00000007077	MSTRG.253773.9	0.97	1	2	1	novel_miR_1222
ENSPSIG00000007077	MSTRG.253773.10	0.95	1	2	1	novel_miR_1222
ENSPSIG00000007077	MSTRG.39575.2	0.97	1	1	1	novel_miR_1222
ENSPSIG00000007077	MSTRG.474438.1	0.98	1	1	1	novel_miR_1222
ENSPSIG00000007077	MSTRG.442024.1	0.84	1	1	1	novel_miR_1222
ENSPSIG00000007077	MSTRG.666646.1	0.81	1	6	1	novel_miR_1222
ENSPSIG00000007077	MSTRG.341863.1	0.86	1	1	1	novel_miR_1222
ENSPSIG00000007077	MSTRG.196778.1	0.9	1	1	1	novel_miR_1222
ENSPSIG00000004149	MSTRG.205931.1	0.95	1	1	1	novel_miR_9914
ENSPSIG00000004149	MSTRG.501157.4	0.81	1	1	1	novel_miR_9914
ENSPSIG00000004149	MSTRG.565504.10	0.89	1	3	1	novel_miR_9914
ENSPSIG00000004149	MSTRG.415722.9	0.82	1	1	1	novel_miR_9914
ENSPSIG00000004149	MSTRG.314133.4	0.95	1	2	1	novel_miR_9914
ENSPSIG00000004149	MSTRG.513020.1	0.95	1	1	1	novel_miR_9914
ENSPSIG00000004149	MSTRG.520150.2	0.83	1	2	1	novel_miR_9914
ENSPSIG00000004149	MSTRG.498963.1	0.98	1	1	1	novel_miR_9914
ENSPSIG00000004149	MSTRG.512101.4	0.96	1	13	1	novel_miR_9914
ENSPSIG00000004149	MSTRG.651643.1	0.91	1	6	1	novel_miR_9914
ENSPSIG00000004149	MSTRG.247901.1	0.99	1	3	1	novel_miR_9914
ENSPSIG00000004149	MSTRG.630720.1	0.93	1	2	1	novel_miR_9914
ENSPSIG00000004149	MSTRG.501157.1	0.84	1	1	1	novel_miR_9914
ENSPSIG00000004149	MSTRG.247901.14	0.97	1	3	1	novel_miR_9914
ENSPSIG00000004149	MSTRG.30243.1	0.94	1	1	1	novel_miR_9914
ENSPSIG00000004149	MSTRG.28860.1	0.88	1	3	1	novel_miR_9914
ENSPSIG00000004149	MSTRG.570313.1	0.96	1	1	1	novel_miR_9914
ENSPSIG00000004149	MSTRG.126571.1	0.98	1	4	1	novel_miR_9914
ENSPSIG00000004149	MSTRG.277921.5	0.89	1	1	1	novel_miR_9914
ENSPSIG00000004149	MSTRG.434588.1	0.89	1	3	1	novel_miR_9914
ENSPSIG00000004149	MSTRG.273468.5	0.86	1	2	1	novel_miR_9914
ENSPSIG00000004149	MSTRG.326652.1	0.9	1	5	1	novel_miR_9914
ENSPSIG00000004149	MSTRG.235518.3	0.99	1	1	1	novel_miR_9914
ENSPSIG00000004149	MSTRG.98381.3	0.8	1	1	1	novel_miR_9914
ENSPSIG00000004149	MSTRG.322132.1	0.88	1	1	1	novel_miR_9914
ENSPSIG00000004149	MSTRG.273468.7	0.8	1	1	1	novel_miR_9914
ENSPSIG00000004149	MSTRG.571642.1	0.83	1	1	1	novel_miR_9914
ENSPSIG00000004149	MSTRG.50332.1	0.93	1	1	1	novel_miR_9914
ENSPSIG00000004149	MSTRG.283214.1	0.88	1	1	1	novel_miR_9914
ENSPSIG00000004149	MSTRG.664918.6	0.85	1	2	1	novel_miR_9914
ENSPSIG00000004149	MSTRG.498963.2	0.97	1	1	1	novel_miR_9914
ENSPSIG00000004149	MSTRG.638440.4	0.86	1	1	1	novel_miR_9914
ENSPSIG00000004149	MSTRG.223055.4	0.95	1	2	1	novel_miR_9914
ENSPSIG00000004149	MSTRG.66988.1	0.86	1	4	1	novel_miR_9914
ENSPSIG00000004149	MSTRG.237302.29	0.92	1	1	1	novel_miR_9914
ENSPSIG00000004149	MSTRG.605309.2	0.96	1	1	1	novel_miR_9914
ENSPSIG00000004149	MSTRG.59353.1	0.96	1	3	1	novel_miR_9914
ENSPSIG00000004149	MSTRG.126571.2	0.97	1	4	1	novel_miR_9914
ENSPSIG00000004149	MSTRG.454471.2	0.98	1	1	1	novel_miR_9914
ENSPSIG00000004149	MSTRG.166226.2	0.96	1	1	1	novel_miR_9914
ENSPSIG00000004149	MSTRG.244210.1	0.93	1	2	1	novel_miR_9914
ENSPSIG00000004149	MSTRG.659641.4	0.82	1	1	1	novel_miR_9914
ENSPSIG00000004149	MSTRG.277921.9	0.81	1	1	1	novel_miR_9914
ENSPSIG00000004149	MSTRG.131588.1	0.95	1	3	1	novel_miR_9914
ENSPSIG00000004149	MSTRG.277921.7	0.98	1	2	1	novel_miR_9914
ENSPSIG00000004149	MSTRG.638440.3	0.86	1	1	1	novel_miR_9914
ENSPSIG00000004149	MSTRG.166226.3	0.84	1	1	1	novel_miR_9914
ENSPSIG00000004149	MSTRG.594884.2	0.96	1	4	1	novel_miR_9914
ENSPSIG00000004149	MSTRG.295423.1	0.86	1	1	1	novel_miR_9914
ENSPSIG00000004149	MSTRG.573038.1	0.86	1	1	1	novel_miR_9914
ENSPSIG00000004149	MSTRG.468977.1	0.93	1	6	1	novel_miR_9914
ENSPSIG00000004149	MSTRG.661791.3	0.87	1	4	1	novel_miR_9914
ENSPSIG00000004149	MSTRG.244210.7	0.97	1	2	1	novel_miR_9914
ENSPSIG00000004149	MSTRG.623523.7	0.84	1	1	1	novel_miR_9914
ENSPSIG00000004149	MSTRG.143035.1	0.94	1	2	1	novel_miR_9914
ENSPSIG00000004149	MSTRG.663879.2	0.88	1	1	1	novel_miR_9914
ENSPSIG00000004149	MSTRG.501157.3	0.99	1	1	1	novel_miR_9914
ENSPSIG00000004149	MSTRG.638440.1	0.87	1	1	1	novel_miR_9914
ENSPSIG00000004149	MSTRG.207450.2	0.86	1	1	1	novel_miR_9914
ENSPSIG00000004149	MSTRG.322132.6	0.82	1	1	1	novel_miR_9914
ENSPSIG00000004149	MSTRG.330132.1	0.96	1	2	1	novel_miR_9914
ENSPSIG00000004149	MSTRG.250126.6	0.83	1	1	1	novel_miR_9914
ENSPSIG00000004149	MSTRG.5704.3	0.86	1	1	1	novel_miR_9914
ENSPSIG00000004149	MSTRG.138919.11	0.86	1	2	1	novel_miR_9914
ENSPSIG00000004149	MSTRG.653732.6	1	1	4	1	novel_miR_9914
ENSPSIG00000004149	MSTRG.407955.29	0.94	1	1	1	novel_miR_9914
ENSPSIG00000004149	MSTRG.623407.2	0.82	1	1	1	novel_miR_9914
ENSPSIG00000004149	MSTRG.234775.2	0.83	1	1	1	novel_miR_9914
ENSPSIG00000004149	MSTRG.259064.1	0.81	1	1	1	novel_miR_9914
ENSPSIG00000004149	MSTRG.181068.1	0.91	1	6	1	novel_miR_9914
ENSPSIG00000004149	MSTRG.259949.1	0.94	1	3	1	novel_miR_9914
ENSPSIG00000004149	MSTRG.331858.1	0.91	1	1	1	novel_miR_9914
ENSPSIG00000004149	MSTRG.89955.7	0.93	1	1	1	novel_miR_9914
ENSPSIG00000004149	MSTRG.295423.3	0.82	1	1	1	novel_miR_9914
ENSPSIG00000004149	MSTRG.45966.1	0.99	1	1	1	novel_miR_9914
ENSPSIG00000004149	MSTRG.513142.1	0.83	1	2	1	novel_miR_9914
ENSPSIG00000004149	MSTRG.66701.2	0.98	1	2	1	novel_miR_9914
ENSPSIG00000013659	MSTRG.634733.1	0.98	1	1	1	novel_miR_42
ENSPSIG00000013659	MSTRG.127189.1	0.98	1	6	1	novel_miR_42
ENSPSIG00000013659	MSTRG.54648.6	0.87	1	1	1	novel_miR_42
ENSPSIG00000013659	MSTRG.339170.5	0.92	1	1	1	novel_miR_42
ENSPSIG00000013659	MSTRG.14398.11	0.95	1	1	1	novel_miR_42
ENSPSIG00000013659	MSTRG.54648.9	0.86	1	3	1	novel_miR_42
ENSPSIG00000013659	MSTRG.589360.1	1	1	3	1	novel_miR_42
ENSPSIG00000013659	MSTRG.297168.1	0.89	1	1	1	novel_miR_42
ENSPSIG00000013659	MSTRG.273064.1	0.93	1	1	1	novel_miR_42
ENSPSIG00000013659	MSTRG.97031.1	0.93	1	1	1	novel_miR_42
ENSPSIG00000013659	MSTRG.8804.5	0.9	1	4	1	novel_miR_42
ENSPSIG00000013659	MSTRG.241006.1	0.94	1	1	1	novel_miR_42
ENSPSIG00000013659	MSTRG.14398.18	0.88	1	1	1	novel_miR_42
ENSPSIG00000013659	MSTRG.343017.1	0.99	1	1	1	novel_miR_42
ENSPSIG00000013659	MSTRG.14398.19	0.82	1	1	1	novel_miR_42
ENSPSIG00000013659	MSTRG.14398.9	0.91	1	1	1	novel_miR_42
ENSPSIG00000013659	MSTRG.8804.3	0.98	1	4	1	novel_miR_42
ENSPSIG00000013659	MSTRG.250126.3	0.86	1	2	1	novel_miR_42
ENSPSIG00000013659	MSTRG.54648.1	0.86	1	3	1	novel_miR_42
ENSPSIG00000013659	MSTRG.499164.1	0.96	1	1	1	novel_miR_42
ENSPSIG00000013659	MSTRG.54648.3	0.98	1	3	1	novel_miR_42
ENSPSIG00000013659	MSTRG.250126.7	0.94	1	2	1	novel_miR_42
ENSPSIG00000009701	MSTRG.107711.3	0.9	1	1	1	novel_miR_2687
ENSPSIG00000009701	MSTRG.363375.1	0.99	1	1	1	novel_miR_2687
ENSPSIG00000009701	MSTRG.107711.2	0.85	1	1	1	novel_miR_2687
ENSPSIG00000009701	MSTRG.180448.3	0.82	1	2	1	novel_miR_2687
ENSPSIG00000009701	MSTRG.423691.7	0.82	1	1	1	novel_miR_2687
ENSPSIG00000009701	MSTRG.107711.1	0.91	1	1	1	novel_miR_2687
ENSPSIG00000009701	MSTRG.509920.11	0.9	1	2	1	novel_miR_2687
ENSPSIG00000009701	MSTRG.46018.1	0.99	1	1	1	novel_miR_2687
ENSPSIG00000009701	MSTRG.357907.1	0.92	1	5	1	novel_miR_2687
ENSPSIG00000009701	MSTRG.115280.8	0.89	1	1	1	novel_miR_2687
ENSPSIG00000009701	MSTRG.574038.1	0.97	1	1	1	novel_miR_2687
ENSPSIG00000009701	MSTRG.157564.1	0.92	1	4	1	novel_miR_2687
ENSPSIG00000009701	MSTRG.650417.1	0.84	1	1	1	novel_miR_2687
ENSPSIG00000009701	MSTRG.384145.1	0.86	1	2	1	novel_miR_2687
ENSPSIG00000009701	MSTRG.196419.1	0.91	1	1	1	novel_miR_2687
ENSPSIG00000011710	MSTRG.173746.1	0.89	1	1	1	novel_miR_10717
ENSPSIG00000011710	MSTRG.545289.1	0.89	1	4	1	novel_miR_10717
ENSPSIG00000011710	MSTRG.32310.2	0.98	1	1	1	novel_miR_10717
ENSPSIG00000011710	MSTRG.129760.3	0.82	1	1	1	novel_miR_10717
ENSPSIG00000011710	MSTRG.406735.1	0.96	1	1	1	novel_miR_10717
ENSPSIG00000011710	MSTRG.516614.23	0.97	1	3	1	novel_miR_10717
ENSPSIG00000011710	MSTRG.26657.2	0.88	1	1	1	novel_miR_10717
ENSPSIG00000011710	MSTRG.492648.1	0.83	1	1	1	novel_miR_10717
ENSPSIG00000011710	MSTRG.493576.1	0.82	1	1	1	novel_miR_10717
ENSPSIG00000011710	MSTRG.77229.1	0.82	1	4	1	novel_miR_10717
ENSPSIG00000011710	MSTRG.212470.1	0.94	1	1	1	novel_miR_10717
ENSPSIG00000011710	MSTRG.173746.2	0.82	1	1	1	novel_miR_10717
ENSPSIG00000011710	MSTRG.46019.1	0.81	1	1	1	novel_miR_10717
ENSPSIG00000011710	MSTRG.403423.11	0.95	1	1	1	novel_miR_10717
ENSPSIG00000011710	MSTRG.141182.1	0.96	1	2	1	novel_miR_10717
ENSPSIG00000011710	MSTRG.32310.4	0.91	1	1	1	novel_miR_10717
ENSPSIG00000011710	MSTRG.352979.1	0.83	1	2	1	novel_miR_10717
ENSPSIG00000011710	MSTRG.580957.1	0.93	1	3	1	novel_miR_10717
ENSPSIG00000011710	MSTRG.126225.1	0.94	1	5	1	novel_miR_10717
ENSPSIG00000011710	MSTRG.493576.3	0.93	1	1	1	novel_miR_10717
ENSPSIG00000011710	MSTRG.516614.22	0.91	1	2	1	novel_miR_10717
ENSPSIG00000011710	MSTRG.236764.7	0.96	1	1	1	novel_miR_10717
ENSPSIG00000011710	MSTRG.115886.2	0.83	1	3	1	novel_miR_10717
ENSPSIG00000011710	MSTRG.436926.1	0.89	1	2	1	novel_miR_10717
ENSPSIG00000011710	MSTRG.516614.25	0.97	1	2	1	novel_miR_10717
ENSPSIG00000011710	MSTRG.599325.1	0.98	1	4	1	novel_miR_10717
ENSPSIG00000011710	MSTRG.129760.8	0.95	1	1	1	novel_miR_10717
ENSPSIG00000011710	MSTRG.105187.1	0.98	1	2	1	novel_miR_10717
ENSPSIG00000011710	MSTRG.663588.1	0.92	1	1	1	novel_miR_10717
ENSPSIG00000014259	MSTRG.196872.4	0.94	1	1	1	novel_miR_6813
ENSPSIG00000014259	MSTRG.478833.12	0.86	1	6	1	novel_miR_6813
ENSPSIG00000014259	MSTRG.625970.2	0.97	1	3	1	novel_miR_6813
ENSPSIG00000014259	MSTRG.463711.2	0.84	1	2	1	novel_miR_6813
ENSPSIG00000014259	MSTRG.551320.1	0.91	1	1	1	novel_miR_6813
ENSPSIG00000014259	MSTRG.157793.1	0.91	1	3	1	novel_miR_6813
ENSPSIG00000014259	MSTRG.188220.12	0.98	1	4	1	novel_miR_6813
ENSPSIG00000014259	MSTRG.569958.14	0.8	1	2	1	novel_miR_6813
ENSPSIG00000014259	MSTRG.27206.6	0.82	1	2	1	novel_miR_6813
ENSPSIG00000014259	MSTRG.608480.1	0.94	1	1	1	novel_miR_6813
ENSPSIG00000014259	MSTRG.194939.1	0.9	1	3	1	novel_miR_6813
ENSPSIG00000014259	MSTRG.524750.7	0.97	1	1	1	novel_miR_6813
ENSPSIG00000014259	MSTRG.114804.1	0.99	1	2	1	novel_miR_6813
ENSPSIG00000014259	MSTRG.478833.4	0.85	1	6	1	novel_miR_6813
ENSPSIG00000014259	MSTRG.160164.8	0.86	1	2	1	novel_miR_6813
ENSPSIG00000014259	MSTRG.552401.1	0.95	1	4	1	novel_miR_6813
ENSPSIG00000014259	MSTRG.312314.2	0.96	1	2	1	novel_miR_6813
ENSPSIG00000014259	MSTRG.289445.2	0.87	1	5	1	novel_miR_6813
ENSPSIG00000014259	MSTRG.253509.6	0.9	1	1	1	novel_miR_6813
ENSPSIG00000014259	MSTRG.572576.2	0.88	1	2	1	novel_miR_6813
ENSPSIG00000014259	MSTRG.126569.2	0.94	1	2	1	novel_miR_6813
ENSPSIG00000014259	MSTRG.577729.1	0.85	1	1	1	novel_miR_6813
ENSPSIG00000014259	MSTRG.53334.1	0.9	1	2	1	novel_miR_6813
ENSPSIG00000014259	MSTRG.284114.1	0.92	1	2	1	novel_miR_6813
ENSPSIG00000014259	MSTRG.517733.2	0.89	1	4	1	novel_miR_6813
ENSPSIG00000014259	MSTRG.368958.1	0.86	1	3	1	novel_miR_6813
ENSPSIG00000014259	MSTRG.111481.1	0.96	1	3	1	novel_miR_6813
ENSPSIG00000016338	MSTRG.27908.1	0.99	1	6	1	novel_miR_1236
ENSPSIG00000016338	MSTRG.513223.1	0.91	1	1	1	novel_miR_1236
ENSPSIG00000016338	MSTRG.298342.1	0.87	1	3	1	novel_miR_1236
ENSPSIG00000016338	MSTRG.644729.1	0.93	1	1	1	novel_miR_1236
ENSPSIG00000016338	MSTRG.293021.1	0.96	1	1	1	novel_miR_1236
ENSPSIG00000016338	MSTRG.95117.1	0.85	1	3	1	novel_miR_1236
ENSPSIG00000013854	MSTRG.249175.1	0.88	1	1	1	novel_miR_42
ENSPSIG00000013854	MSTRG.246980.4	0.86	1	3	1	novel_miR_42
ENSPSIG00000013854	MSTRG.213494.12	0.9	1	1	1	novel_miR_42
ENSPSIG00000013854	MSTRG.54648.10	0.83	1	1	1	novel_miR_42
ENSPSIG00000013854	MSTRG.599370.1	0.93	1	1	1	novel_miR_42
ENSPSIG00000013854	MSTRG.54648.9	0.9	1	3	1	novel_miR_42
ENSPSIG00000013854	MSTRG.262634.3	0.96	1	1	1	novel_miR_42
ENSPSIG00000013854	MSTRG.241006.1	0.84	1	1	1	novel_miR_42
ENSPSIG00000013854	MSTRG.589360.4	0.89	1	3	1	novel_miR_42
ENSPSIG00000013854	MSTRG.368950.1	0.94	1	4	1	novel_miR_42
ENSPSIG00000013854	MSTRG.14398.18	0.82	1	1	1	novel_miR_42
ENSPSIG00000013854	MSTRG.250126.3	0.86	1	2	1	novel_miR_42
ENSPSIG00000013854	MSTRG.54648.1	0.92	1	3	1	novel_miR_42
ENSPSIG00000008716	MSTRG.69479.2	0.83	1	1	1	novel_miR_6265
ENSPSIG00000008716	MSTRG.350135.1	0.86	1	6	1	novel_miR_6265
ENSPSIG00000008716	MSTRG.239817.1	0.98	1	1	1	novel_miR_6265
ENSPSIG00000008716	MSTRG.307262.1	0.97	1	2	1	novel_miR_6265
ENSPSIG00000008716	MSTRG.409060.1	1	1	1	1	novel_miR_6265
ENSPSIG00000008716	MSTRG.237624.4	0.94	1	1	1	novel_miR_6265
ENSPSIG00000008716	MSTRG.235706.1	0.92	1	3	1	novel_miR_6265
ENSPSIG00000008716	MSTRG.419821.1	0.83	1	3	1	novel_miR_6265
ENSPSIG00000008716	MSTRG.15670.3	0.83	1	2	1	novel_miR_6265
ENSPSIG00000008716	MSTRG.271731.1	0.82	1	1	1	novel_miR_6265
ENSPSIG00000008716	MSTRG.336194.1	0.8	1	2	1	novel_miR_6265
ENSPSIG00000008716	MSTRG.252315.1	0.82	1	2	1	novel_miR_6265
ENSPSIG00000008716	MSTRG.641389.10	0.94	1	1	1	novel_miR_6265
ENSPSIG00000008716	MSTRG.304975.2	0.82	1	1	1	novel_miR_6265
ENSPSIG00000008716	MSTRG.6191.6	0.87	1	1	1	novel_miR_6265
ENSPSIG00000008716	MSTRG.419821.4	0.95	1	1	1	novel_miR_6265
ENSPSIG00000013200	MSTRG.513020.1	0.82	1	1	1	novel_miR_9914
ENSPSIG00000013200	MSTRG.498963.1	0.83	1	1	1	novel_miR_9914
ENSPSIG00000013200	MSTRG.247901.1	0.94	1	3	1	novel_miR_9914
ENSPSIG00000013200	MSTRG.247901.14	0.8	1	3	1	novel_miR_9914
ENSPSIG00000013200	MSTRG.30243.1	0.98	1	1	1	novel_miR_9914
ENSPSIG00000013200	MSTRG.126571.1	0.96	1	4	1	novel_miR_9914
ENSPSIG00000013200	MSTRG.277921.5	0.99	1	1	1	novel_miR_9914
ENSPSIG00000013200	MSTRG.434588.1	0.92	1	3	1	novel_miR_9914
ENSPSIG00000013200	MSTRG.623523.8	0.88	1	1	1	novel_miR_9914
ENSPSIG00000013200	MSTRG.436942.9	0.91	1	1	1	novel_miR_9914
ENSPSIG00000013200	MSTRG.326652.1	0.91	1	5	1	novel_miR_9914
ENSPSIG00000013200	MSTRG.168465.1	0.92	1	1	1	novel_miR_9914
ENSPSIG00000013200	MSTRG.235518.3	0.92	1	1	1	novel_miR_9914
ENSPSIG00000013200	MSTRG.128949.4	0.94	1	3	1	novel_miR_9914
ENSPSIG00000013200	MSTRG.273468.7	0.98	1	1	1	novel_miR_9914
ENSPSIG00000013200	MSTRG.571642.1	0.86	1	1	1	novel_miR_9914
ENSPSIG00000013200	MSTRG.50332.1	0.95	1	1	1	novel_miR_9914
ENSPSIG00000013200	MSTRG.283214.1	0.87	1	1	1	novel_miR_9914
ENSPSIG00000013200	MSTRG.498963.2	0.97	1	1	1	novel_miR_9914
ENSPSIG00000013200	MSTRG.169989.6	0.83	1	1	1	novel_miR_9914
ENSPSIG00000013200	MSTRG.223055.4	0.92	1	2	1	novel_miR_9914
ENSPSIG00000013200	MSTRG.126571.2	0.96	1	4	1	novel_miR_9914
ENSPSIG00000013200	MSTRG.454471.2	0.96	1	1	1	novel_miR_9914
ENSPSIG00000013200	MSTRG.166226.2	0.88	1	1	1	novel_miR_9914
ENSPSIG00000013200	MSTRG.659641.4	0.86	1	1	1	novel_miR_9914
ENSPSIG00000013200	MSTRG.238076.1	0.92	1	2	1	novel_miR_9914
ENSPSIG00000013200	MSTRG.277921.9	0.99	1	1	1	novel_miR_9914
ENSPSIG00000013200	MSTRG.131588.1	0.89	1	3	1	novel_miR_9914
ENSPSIG00000013200	MSTRG.277921.7	0.94	1	2	1	novel_miR_9914
ENSPSIG00000013200	MSTRG.594884.2	0.87	1	4	1	novel_miR_9914
ENSPSIG00000013200	MSTRG.417.4	0.85	1	2	1	novel_miR_9914
ENSPSIG00000013200	MSTRG.573038.1	0.88	1	1	1	novel_miR_9914
ENSPSIG00000013200	MSTRG.468977.1	0.84	1	6	1	novel_miR_9914
ENSPSIG00000013200	MSTRG.244210.7	0.9	1	2	1	novel_miR_9914
ENSPSIG00000013200	MSTRG.623523.7	0.98	1	1	1	novel_miR_9914
ENSPSIG00000013200	MSTRG.143035.1	0.91	1	2	1	novel_miR_9914
ENSPSIG00000013200	MSTRG.35171.1	0.95	1	5	1	novel_miR_9914
ENSPSIG00000013200	MSTRG.663879.2	0.85	1	1	1	novel_miR_9914
ENSPSIG00000013200	MSTRG.501157.3	0.88	1	1	1	novel_miR_9914
ENSPSIG00000013200	MSTRG.289069.1	0.93	1	1	1	novel_miR_9914
ENSPSIG00000013200	MSTRG.638440.1	1	1	1	1	novel_miR_9914
ENSPSIG00000013200	MSTRG.277921.1	0.91	1	1	1	novel_miR_9914
ENSPSIG00000013200	MSTRG.65133.1	0.91	1	1	1	novel_miR_9914
ENSPSIG00000013200	MSTRG.148380.4	0.94	1	2	1	novel_miR_9914
ENSPSIG00000013200	MSTRG.653732.6	0.89	1	4	1	novel_miR_9914
ENSPSIG00000013200	MSTRG.407955.29	0.9	1	1	1	novel_miR_9914
ENSPSIG00000013200	MSTRG.18134.3	0.92	1	2	1	novel_miR_9914
ENSPSIG00000013200	MSTRG.501157.7	0.96	1	1	1	novel_miR_9914
ENSPSIG00000013200	MSTRG.259064.1	0.91	1	1	1	novel_miR_9914
ENSPSIG00000013200	MSTRG.289069.2	0.92	1	1	1	novel_miR_9914
ENSPSIG00000013200	MSTRG.247542.5	0.9	1	1	1	novel_miR_9914
ENSPSIG00000013200	MSTRG.259949.1	0.97	1	3	1	novel_miR_9914
ENSPSIG00000013200	MSTRG.331858.1	0.9	1	1	1	novel_miR_9914
ENSPSIG00000013200	MSTRG.89955.7	0.98	1	1	1	novel_miR_9914
ENSPSIG00000013200	MSTRG.295423.3	0.96	1	1	1	novel_miR_9914
ENSPSIG00000013200	MSTRG.45966.1	0.9	1	1	1	novel_miR_9914
ENSPSIG00000013200	MSTRG.513142.1	0.94	1	2	1	novel_miR_9914
ENSPSIG00000013200	MSTRG.66701.2	0.89	1	2	1	novel_miR_9914
ENSPSIG00000007146	MSTRG.309066.1	0.81	1	1	1	novel_miR_615
ENSPSIG00000007146	MSTRG.358405.1	0.92	1	1	1	novel_miR_615
ENSPSIG00000007146	MSTRG.419467.5	0.82	1	1	1	novel_miR_615
ENSPSIG00000004045	MSTRG.591297.1	0.93	1	1	1	novel_miR_2419
ENSPSIG00000004045	MSTRG.62813.1	0.97	1	1	1	novel_miR_2419
ENSPSIG00000004045	MSTRG.351108.4	0.87	1	2	1	novel_miR_2419
ENSPSIG00000004045	MSTRG.346531.1	0.8	1	1	1	novel_miR_2419
ENSPSIG00000004045	MSTRG.52032.1	0.82	1	2	1	novel_miR_2419
ENSPSIG00000004045	MSTRG.301205.4	0.88	1	1	1	novel_miR_2419
ENSPSIG00000004045	MSTRG.536254.9	0.82	1	2	1	novel_miR_2419
ENSPSIG00000004045	MSTRG.487922.4	0.85	1	2	1	novel_miR_2419
ENSPSIG00000004045	MSTRG.438405.1	0.87	1	2	1	novel_miR_2419
ENSPSIG00000004045	MSTRG.333484.1	0.87	1	1	1	novel_miR_2419
ENSPSIG00000004045	MSTRG.481535.1	0.95	1	1	1	novel_miR_2419
ENSPSIG00000004045	MSTRG.477922.8	0.88	1	1	1	novel_miR_2419
ENSPSIG00000004045	MSTRG.334654.1	0.81	1	1	1	novel_miR_2419
ENSPSIG00000004045	MSTRG.79445.1	0.92	1	1	1	novel_miR_2419
ENSPSIG00000004045	MSTRG.394602.2	0.9	1	1	1	novel_miR_2419
ENSPSIG00000004045	MSTRG.339217.1	0.97	1	1	1	novel_miR_2419
ENSPSIG00000004045	MSTRG.57854.1	0.82	1	1	1	novel_miR_2419
ENSPSIG00000004045	MSTRG.653394.1	0.97	1	1	1	novel_miR_2419
ENSPSIG00000004045	MSTRG.62813.2	0.87	1	1	1	novel_miR_2419
ENSPSIG00000004045	MSTRG.123443.2	0.96	1	4	1	novel_miR_2419
ENSPSIG00000004045	MSTRG.301205.1	0.88	1	2	1	novel_miR_2419
ENSPSIG00000004045	MSTRG.137516.2	0.83	1	1	1	novel_miR_2419
ENSPSIG00000004045	MSTRG.609885.1	0.93	1	2	1	novel_miR_2419
ENSPSIG00000006428	MSTRG.413674.1	0.86	1	1	1	novel_miR_8799
ENSPSIG00000006428	MSTRG.310141.2	0.98	1	1	1	novel_miR_8799
ENSPSIG00000006428	MSTRG.624144.3	0.87	1	1	1	novel_miR_8799
ENSPSIG00000006428	MSTRG.114766.1	0.91	1	1	1	novel_miR_8799
ENSPSIG00000006428	MSTRG.214787.1	0.85	1	1	1	novel_miR_8799
ENSPSIG00000006428	MSTRG.138915.1	0.99	1	1	1	novel_miR_8799
ENSPSIG00000006428	MSTRG.646489.19	0.8	1	1	1	novel_miR_8799
ENSPSIG00000006428	MSTRG.404084.1	0.93	1	2	1	novel_miR_8799
ENSPSIG00000006428	MSTRG.165174.1	0.99	1	3	1	novel_miR_8799
ENSPSIG00000006428	MSTRG.278352.6	0.81	1	1	1	novel_miR_8799
ENSPSIG00000006428	MSTRG.659641.1	0.91	1	2	1	novel_miR_8799
ENSPSIG00000006428	MSTRG.637319.3	0.81	1	2	1	novel_miR_8799
ENSPSIG00000006428	MSTRG.37468.4	0.99	1	2	1	novel_miR_8799
ENSPSIG00000006428	MSTRG.318882.11	0.92	1	1	1	novel_miR_8799
ENSPSIG00000006428	MSTRG.574865.2	0.83	1	3	1	novel_miR_8799
ENSPSIG00000006428	MSTRG.211277.1	0.83	1	12	1	novel_miR_8799
ENSPSIG00000006428	MSTRG.576617.2	0.82	1	1	1	novel_miR_8799
ENSPSIG00000006428	MSTRG.552215.2	0.97	1	1	1	novel_miR_8799
ENSPSIG00000006428	MSTRG.322551.41	0.88	1	1	1	novel_miR_8799
ENSPSIG00000006428	MSTRG.316298.4	0.96	1	1	1	novel_miR_8799
ENSPSIG00000006428	MSTRG.278352.3	0.81	1	1	1	novel_miR_8799
ENSPSIG00000006428	MSTRG.271241.1	0.92	1	1	1	novel_miR_8799
ENSPSIG00000006428	MSTRG.497413.3	0.84	1	5	1	novel_miR_8799
ENSPSIG00000006428	MSTRG.638542.1	0.92	1	1	1	novel_miR_8799
ENSPSIG00000006428	MSTRG.162128.2	0.98	1	4	1	novel_miR_8799
ENSPSIG00000007487	MSTRG.639506.3	0.94	1	1	1	novel_miR_9819
ENSPSIG00000007487	MSTRG.639506.1	0.97	1	1	1	novel_miR_9819
ENSPSIG00000007487	MSTRG.272034.2	0.84	1	2	1	novel_miR_9819
ENSPSIG00000007487	MSTRG.429098.1	0.96	1	1	1	novel_miR_9819
ENSPSIG00000007487	MSTRG.38398.1	0.86	1	1	1	novel_miR_9819
ENSPSIG00000007487	MSTRG.381395.1	0.93	1	1	1	novel_miR_9819
ENSPSIG00000007487	MSTRG.212326.1	0.85	1	4	1	novel_miR_9819
ENSPSIG00000007487	MSTRG.238824.2	0.93	1	1	1	novel_miR_9819
ENSPSIG00000007487	MSTRG.540112.1	0.94	1	1	1	novel_miR_9819
ENSPSIG00000007487	MSTRG.636018.1	0.89	1	3	1	novel_miR_9819
ENSPSIG00000017828	MSTRG.611898.1	0.93	1	1	1	novel_miR_10720
ENSPSIG00000017828	MSTRG.240911.1	0.95	1	1	1	novel_miR_10720
ENSPSIG00000017828	MSTRG.306182.1	0.89	1	1	1	novel_miR_10720
ENSPSIG00000017828	MSTRG.301632.1	0.92	1	2	1	novel_miR_10720
ENSPSIG00000017828	MSTRG.306182.2	0.83	1	1	1	novel_miR_10720
ENSPSIG00000017828	MSTRG.537778.1	0.85	1	4	1	novel_miR_10720
ENSPSIG00000017828	MSTRG.126049.1	0.98	1	1	1	novel_miR_10720
ENSPSIG00000013929	MSTRG.591297.1	0.92	1	1	1	novel_miR_2419
ENSPSIG00000013929	MSTRG.62813.1	0.97	1	1	1	novel_miR_2419
ENSPSIG00000013929	MSTRG.351108.4	0.87	1	2	1	novel_miR_2419
ENSPSIG00000013929	MSTRG.346531.1	0.81	1	1	1	novel_miR_2419
ENSPSIG00000013929	MSTRG.52032.1	0.81	1	2	1	novel_miR_2419
ENSPSIG00000013929	MSTRG.301205.4	0.89	1	1	1	novel_miR_2419
ENSPSIG00000013929	MSTRG.536254.9	0.81	1	2	1	novel_miR_2419
ENSPSIG00000013929	MSTRG.487922.4	0.85	1	2	1	novel_miR_2419
ENSPSIG00000013929	MSTRG.438405.1	0.88	1	2	1	novel_miR_2419
ENSPSIG00000013929	MSTRG.333484.1	0.87	1	1	1	novel_miR_2419
ENSPSIG00000013929	MSTRG.481535.1	0.95	1	1	1	novel_miR_2419
ENSPSIG00000013929	MSTRG.477922.8	0.88	1	1	1	novel_miR_2419
ENSPSIG00000013929	MSTRG.334654.1	0.8	1	1	1	novel_miR_2419
ENSPSIG00000013929	MSTRG.79445.1	0.91	1	1	1	novel_miR_2419
ENSPSIG00000013929	MSTRG.394602.2	0.89	1	1	1	novel_miR_2419
ENSPSIG00000013929	MSTRG.339217.1	0.97	1	1	1	novel_miR_2419
ENSPSIG00000013929	MSTRG.57854.1	0.82	1	1	1	novel_miR_2419
ENSPSIG00000013929	MSTRG.653394.1	0.96	1	1	1	novel_miR_2419
ENSPSIG00000013929	MSTRG.62813.2	0.87	1	1	1	novel_miR_2419
ENSPSIG00000013929	MSTRG.123443.2	0.96	1	4	1	novel_miR_2419
ENSPSIG00000013929	MSTRG.301205.1	0.87	1	2	1	novel_miR_2419
ENSPSIG00000013929	MSTRG.137516.2	0.84	1	1	1	novel_miR_2419
ENSPSIG00000013929	MSTRG.609885.1	0.91	1	2	1	novel_miR_2419
ENSPSIG00000017160	MSTRG.71049.8	0.87	1	2	1	novel_miR_1222
ENSPSIG00000017160	MSTRG.356033.2	0.96	1	3	1	novel_miR_1222
ENSPSIG00000017160	MSTRG.340179.1	0.99	1	1	1	novel_miR_1222
ENSPSIG00000017160	MSTRG.658619.2	1	1	1	1	novel_miR_1222
ENSPSIG00000017160	MSTRG.359973.1	0.9	1	1	1	novel_miR_1222
ENSPSIG00000017160	MSTRG.472123.2	0.97	1	2	1	novel_miR_1222
ENSPSIG00000017160	MSTRG.517102.1	0.89	1	5	1	novel_miR_1222
ENSPSIG00000017160	MSTRG.592162.7	0.88	1	1	1	novel_miR_1222
ENSPSIG00000017160	MSTRG.116104.1	0.86	1	1	1	novel_miR_1222
ENSPSIG00000017160	MSTRG.664208.4	0.87	1	1	1	novel_miR_1222
ENSPSIG00000017160	MSTRG.71506.2	0.95	1	3	1	novel_miR_1222
ENSPSIG00000017160	MSTRG.233312.10	0.91	1	1	1	novel_miR_1222
ENSPSIG00000017160	MSTRG.335622.2	0.92	1	2	1	novel_miR_1222
ENSPSIG00000017160	MSTRG.188817.3	0.98	1	5	1	novel_miR_1222
ENSPSIG00000017160	MSTRG.164457.10	0.85	1	1	1	novel_miR_1222
ENSPSIG00000017160	MSTRG.102076.2	0.92	1	1	1	novel_miR_1222
ENSPSIG00000017160	MSTRG.575606.1	0.98	1	1	1	novel_miR_1222
ENSPSIG00000017160	MSTRG.162146.3	0.9	1	7	1	novel_miR_1222
ENSPSIG00000017160	MSTRG.233312.9	0.82	1	1	1	novel_miR_1222
ENSPSIG00000017160	MSTRG.374635.1	0.97	1	1	1	novel_miR_1222
ENSPSIG00000017160	MSTRG.317285.3	0.8	1	1	1	novel_miR_1222
ENSPSIG00000017160	MSTRG.319496.1	0.91	1	5	1	novel_miR_1222
ENSPSIG00000017160	MSTRG.76993.1	0.87	1	3	1	novel_miR_1222
ENSPSIG00000017160	MSTRG.403539.28	0.88	1	1	1	novel_miR_1222
ENSPSIG00000017160	MSTRG.516805.6	0.95	1	1	1	novel_miR_1222
ENSPSIG00000017160	MSTRG.77482.1	0.9	1	1	1	novel_miR_1222
ENSPSIG00000017160	MSTRG.566826.1	0.98	1	3	1	novel_miR_1222
ENSPSIG00000017160	MSTRG.250853.1	0.95	1	1	1	novel_miR_1222
ENSPSIG00000017160	MSTRG.403539.35	0.88	1	1	1	novel_miR_1222
ENSPSIG00000017160	MSTRG.513201.1	0.82	1	1	1	novel_miR_1222
ENSPSIG00000017160	MSTRG.84138.2	0.8	1	1	1	novel_miR_1222
ENSPSIG00000017160	MSTRG.598987.1	0.98	1	1	1	novel_miR_1222
ENSPSIG00000017160	MSTRG.143736.7	0.89	1	3	1	novel_miR_1222
ENSPSIG00000017160	MSTRG.174191.1	0.92	1	3	1	novel_miR_1222
ENSPSIG00000017160	MSTRG.297764.1	0.81	1	1	1	novel_miR_1222
ENSPSIG00000017160	MSTRG.185694.1	0.96	1	1	1	novel_miR_1222
ENSPSIG00000017160	MSTRG.30117.3	0.95	1	1	1	novel_miR_1222
ENSPSIG00000017160	MSTRG.278638.3	0.88	1	1	1	novel_miR_1222
ENSPSIG00000017160	MSTRG.71049.5	0.84	1	2	1	novel_miR_1222
ENSPSIG00000017160	MSTRG.39575.1	0.81	1	1	1	novel_miR_1222
ENSPSIG00000017160	MSTRG.66998.4	0.95	1	4	1	novel_miR_1222
ENSPSIG00000017160	MSTRG.568196.1	0.97	1	1	1	novel_miR_1222
ENSPSIG00000017160	MSTRG.440766.1	0.87	1	1	1	novel_miR_1222
ENSPSIG00000017160	MSTRG.665786.3	0.96	1	1	1	novel_miR_1222
ENSPSIG00000017160	MSTRG.294027.2	0.96	1	2	1	novel_miR_1222
ENSPSIG00000017160	MSTRG.388572.2	0.9	1	1	1	novel_miR_1222
ENSPSIG00000017160	MSTRG.141508.2	0.84	1	2	1	novel_miR_1222
ENSPSIG00000017160	MSTRG.304975.5	0.88	1	2	1	novel_miR_1222
ENSPSIG00000017160	MSTRG.264227.3	0.96	1	3	1	novel_miR_1222
ENSPSIG00000017160	MSTRG.253773.9	0.98	1	2	1	novel_miR_1222
ENSPSIG00000017160	MSTRG.253773.10	0.98	1	2	1	novel_miR_1222
ENSPSIG00000017160	MSTRG.39575.2	0.95	1	1	1	novel_miR_1222
ENSPSIG00000017160	MSTRG.474438.1	0.96	1	1	1	novel_miR_1222
ENSPSIG00000017160	MSTRG.442024.1	0.84	1	1	1	novel_miR_1222
ENSPSIG00000017160	MSTRG.666646.1	0.87	1	6	1	novel_miR_1222
ENSPSIG00000017160	MSTRG.341863.1	0.83	1	1	1	novel_miR_1222
ENSPSIG00000017160	MSTRG.196778.1	0.89	1	1	1	novel_miR_1222
ENSPSIG00000017672	MSTRG.281477.1	0.82	1	1	1	novel_miR_6487
ENSPSIG00000017672	MSTRG.452102.13	0.91	1	3	1	novel_miR_6487
ENSPSIG00000017672	MSTRG.69423.2	0.9	1	5	1	novel_miR_6487
ENSPSIG00000017672	MSTRG.250391.1	0.93	1	4	1	novel_miR_6487
ENSPSIG00000017672	MSTRG.11920.1	0.91	1	1	1	novel_miR_6487
ENSPSIG00000017672	MSTRG.346215.1	0.92	1	2	1	novel_miR_6487
ENSPSIG00000017672	MSTRG.271824.1	0.8	1	1	1	novel_miR_6487
ENSPSIG00000017672	MSTRG.168282.1	0.83	1	1	1	novel_miR_6487
ENSPSIG00000017672	MSTRG.405238.1	0.91	1	2	1	novel_miR_6487
ENSPSIG00000017672	MSTRG.346510.1	0.91	1	2	1	novel_miR_6487
ENSPSIG00000017672	MSTRG.281477.2	0.81	1	1	1	novel_miR_6487
ENSPSIG00000017672	MSTRG.188847.7	0.83	1	2	1	novel_miR_6487
ENSPSIG00000005422	MSTRG.31210.2	0.83	1	1	1	novel_miR_1222
ENSPSIG00000005422	MSTRG.340179.1	0.92	1	1	1	novel_miR_1222
ENSPSIG00000005422	MSTRG.658619.2	0.86	1	1	1	novel_miR_1222
ENSPSIG00000005422	MSTRG.472123.2	0.82	1	2	1	novel_miR_1222
ENSPSIG00000005422	MSTRG.592162.7	1	1	1	1	novel_miR_1222
ENSPSIG00000005422	MSTRG.116104.1	1	1	1	1	novel_miR_1222
ENSPSIG00000005422	MSTRG.173512.1	0.9	1	1	1	novel_miR_1222
ENSPSIG00000005422	MSTRG.626224.2	0.8	1	1	1	novel_miR_1222
ENSPSIG00000005422	MSTRG.188817.3	0.93	1	5	1	novel_miR_1222
ENSPSIG00000005422	MSTRG.102076.2	0.82	1	1	1	novel_miR_1222
ENSPSIG00000005422	MSTRG.162146.3	0.82	1	7	1	novel_miR_1222
ENSPSIG00000005422	MSTRG.233312.9	0.99	1	1	1	novel_miR_1222
ENSPSIG00000005422	MSTRG.319496.1	0.84	1	5	1	novel_miR_1222
ENSPSIG00000005422	MSTRG.566826.1	0.85	1	3	1	novel_miR_1222
ENSPSIG00000005422	MSTRG.250853.1	0.84	1	1	1	novel_miR_1222
ENSPSIG00000005422	MSTRG.403539.35	1	1	1	1	novel_miR_1222
ENSPSIG00000005422	MSTRG.428210.1	0.86	1	1	1	novel_miR_1222
ENSPSIG00000005422	MSTRG.513201.1	0.99	1	1	1	novel_miR_1222
ENSPSIG00000005422	MSTRG.598987.1	0.86	1	1	1	novel_miR_1222
ENSPSIG00000005422	MSTRG.174191.1	0.89	1	3	1	novel_miR_1222
ENSPSIG00000005422	MSTRG.297764.1	0.97	1	1	1	novel_miR_1222
ENSPSIG00000005422	MSTRG.185694.1	0.81	1	1	1	novel_miR_1222
ENSPSIG00000005422	MSTRG.30117.3	0.83	1	1	1	novel_miR_1222
ENSPSIG00000005422	MSTRG.665786.3	0.84	1	1	1	novel_miR_1222
ENSPSIG00000005422	MSTRG.141508.2	0.82	1	2	1	novel_miR_1222
ENSPSIG00000005422	MSTRG.264227.3	0.81	1	3	1	novel_miR_1222
ENSPSIG00000005422	MSTRG.253773.10	0.85	1	2	1	novel_miR_1222
ENSPSIG00000005422	MSTRG.274888.1	0.89	1	2	1	novel_miR_1222
ENSPSIG00000005422	MSTRG.196778.1	0.95	1	1	1	novel_miR_1222
ENSPSIG00000009890	MSTRG.240031.7	0.81	1	4	1	novel_miR_2026
ENSPSIG00000009890	MSTRG.374637.1	0.91	1	2	1	novel_miR_2026
ENSPSIG00000009890	MSTRG.438646.1	0.97	1	2	1	novel_miR_2026
ENSPSIG00000009890	MSTRG.32363.1	0.84	1	1	1	novel_miR_2026
ENSPSIG00000009890	MSTRG.32363.2	0.99	1	1	1	novel_miR_2026
ENSPSIG00000009890	MSTRG.551277.1	0.96	1	3	1	novel_miR_2026
ENSPSIG00000009890	MSTRG.257173.1	0.82	1	1	1	novel_miR_2026
ENSPSIG00000009890	MSTRG.394973.1	0.92	1	1	1	novel_miR_2026
ENSPSIG00000009890	MSTRG.511949.10	0.82	1	1	1	novel_miR_2026
ENSPSIG00000009890	MSTRG.459623.12	0.96	1	2	1	novel_miR_2026
ENSPSIG00000009890	MSTRG.257173.7	0.88	1	1	1	novel_miR_2026
ENSPSIG00000009890	MSTRG.77871.1	0.88	1	3	1	novel_miR_2026
ENSPSIG00000009890	MSTRG.613019.10	0.87	1	2	1	novel_miR_2026
ENSPSIG00000009890	MSTRG.599370.2	0.84	1	1	1	novel_miR_2026
ENSPSIG00000009890	MSTRG.12484.1	0.83	1	4	1	novel_miR_2026
ENSPSIG00000009890	MSTRG.18134.18	0.9	1	4	1	novel_miR_2026
ENSPSIG00000009890	MSTRG.506816.1	0.95	1	1	1	novel_miR_2026
ENSPSIG00000009890	MSTRG.432250.3	0.82	1	1	1	novel_miR_2026
ENSPSIG00000009890	MSTRG.316160.1	0.91	1	1	1	novel_miR_2026
ENSPSIG00000009890	MSTRG.241697.1	0.84	1	3	1	novel_miR_2026
ENSPSIG00000009890	MSTRG.660384.1	0.8	1	2	1	novel_miR_2026
ENSPSIG00000009890	MSTRG.321814.1	1	1	1	1	novel_miR_2026
ENSPSIG00000009890	MSTRG.393910.1	0.95	1	2	1	novel_miR_2026
ENSPSIG00000009890	MSTRG.50204.1	0.95	1	1	1	novel_miR_2026
ENSPSIG00000009890	MSTRG.221427.1	0.98	1	1	1	novel_miR_2026
ENSPSIG00000009890	MSTRG.71379.11	1	1	5	1	novel_miR_2026
ENSPSIG00000009890	MSTRG.480222.5	1	1	4	1	novel_miR_2026
ENSPSIG00000009890	MSTRG.404588.1	0.97	1	1	1	novel_miR_2026
ENSPSIG00000009890	MSTRG.646035.3	0.98	1	1	1	novel_miR_2026
ENSPSIG00000009890	MSTRG.623276.3	0.98	1	1	1	novel_miR_2026
ENSPSIG00000009890	MSTRG.281566.11	0.81	1	1	1	novel_miR_2026
ENSPSIG00000009890	MSTRG.473342.2	0.9	1	2	1	novel_miR_2026
ENSPSIG00000009890	MSTRG.89534.1	0.82	1	1	1	novel_miR_2026
ENSPSIG00000009890	MSTRG.382448.1	0.95	1	1	1	novel_miR_2026
ENSPSIG00000009890	MSTRG.257173.4	0.91	1	2	1	novel_miR_2026
ENSPSIG00000009890	MSTRG.437140.1	0.99	1	1	1	novel_miR_2026
ENSPSIG00000009890	MSTRG.542661.1	0.93	1	2	1	novel_miR_2026
ENSPSIG00000009890	MSTRG.210694.1	0.99	1	1	1	novel_miR_2026
ENSPSIG00000009890	MSTRG.403539.25	0.81	1	2	1	novel_miR_2026
ENSPSIG00000009890	MSTRG.292090.6	0.95	1	1	1	novel_miR_2026
ENSPSIG00000009890	MSTRG.50204.4	0.93	1	1	1	novel_miR_2026
ENSPSIG00000009890	MSTRG.92833.7	0.97	1	5	1	novel_miR_2026
ENSPSIG00000009890	MSTRG.391623.1	0.88	1	1	1	novel_miR_2026
ENSPSIG00000005862	MSTRG.196872.4	0.92	1	1	1	novel_miR_6813
ENSPSIG00000005862	MSTRG.35390.3	0.98	1	1	1	novel_miR_6813
ENSPSIG00000005862	MSTRG.85436.1	0.93	1	1	1	novel_miR_6813
ENSPSIG00000005862	MSTRG.625970.2	0.84	1	3	1	novel_miR_6813
ENSPSIG00000005862	MSTRG.414343.19	0.85	1	1	1	novel_miR_6813
ENSPSIG00000005862	MSTRG.492115.6	0.9	1	4	1	novel_miR_6813
ENSPSIG00000005862	MSTRG.551320.1	0.97	1	1	1	novel_miR_6813
ENSPSIG00000005862	MSTRG.569958.14	0.94	1	2	1	novel_miR_6813
ENSPSIG00000005862	MSTRG.27206.6	0.92	1	2	1	novel_miR_6813
ENSPSIG00000005862	MSTRG.608480.1	0.99	1	1	1	novel_miR_6813
ENSPSIG00000005862	MSTRG.194939.1	0.85	1	3	1	novel_miR_6813
ENSPSIG00000005862	MSTRG.524750.7	0.87	1	1	1	novel_miR_6813
ENSPSIG00000005862	MSTRG.114804.1	0.85	1	2	1	novel_miR_6813
ENSPSIG00000005862	MSTRG.312314.2	0.9	1	2	1	novel_miR_6813
ENSPSIG00000005862	MSTRG.577729.1	0.95	1	1	1	novel_miR_6813
ENSPSIG00000005862	MSTRG.26375.1	0.95	1	1	1	novel_miR_6813
ENSPSIG00000005862	MSTRG.517733.2	0.93	1	4	1	novel_miR_6813
ENSPSIG00000005862	MSTRG.368958.1	0.89	1	3	1	novel_miR_6813
ENSPSIG00000005862	MSTRG.111481.1	0.84	1	3	1	novel_miR_6813
ENSPSIG00000006461	MSTRG.356033.2	0.99	1	3	1	novel_miR_1222
ENSPSIG00000006461	MSTRG.388572.1	0.92	1	1	1	novel_miR_1222
ENSPSIG00000006461	MSTRG.340179.1	0.92	1	1	1	novel_miR_1222
ENSPSIG00000006461	MSTRG.658619.2	0.96	1	1	1	novel_miR_1222
ENSPSIG00000006461	MSTRG.359973.1	0.88	1	1	1	novel_miR_1222
ENSPSIG00000006461	MSTRG.472123.2	0.97	1	2	1	novel_miR_1222
ENSPSIG00000006461	MSTRG.517102.1	0.92	1	5	1	novel_miR_1222
ENSPSIG00000006461	MSTRG.664208.4	0.98	1	1	1	novel_miR_1222
ENSPSIG00000006461	MSTRG.71506.2	1	1	3	1	novel_miR_1222
ENSPSIG00000006461	MSTRG.233312.10	0.98	1	1	1	novel_miR_1222
ENSPSIG00000006461	MSTRG.335622.2	0.97	1	2	1	novel_miR_1222
ENSPSIG00000006461	MSTRG.188817.3	0.87	1	5	1	novel_miR_1222
ENSPSIG00000006461	MSTRG.164457.10	0.96	1	1	1	novel_miR_1222
ENSPSIG00000006461	MSTRG.102076.2	0.92	1	1	1	novel_miR_1222
ENSPSIG00000006461	MSTRG.575606.1	0.95	1	1	1	novel_miR_1222
ENSPSIG00000006461	MSTRG.374635.1	0.93	1	1	1	novel_miR_1222
ENSPSIG00000006461	MSTRG.319496.1	0.91	1	5	1	novel_miR_1222
ENSPSIG00000006461	MSTRG.403539.28	0.98	1	1	1	novel_miR_1222
ENSPSIG00000006461	MSTRG.516805.6	0.95	1	1	1	novel_miR_1222
ENSPSIG00000006461	MSTRG.77482.1	0.94	1	1	1	novel_miR_1222
ENSPSIG00000006461	MSTRG.503425.2	0.8	1	2	1	novel_miR_1222
ENSPSIG00000006461	MSTRG.566826.1	0.92	1	3	1	novel_miR_1222
ENSPSIG00000006461	MSTRG.249108.8	0.93	1	1	1	novel_miR_1222
ENSPSIG00000006461	MSTRG.41915.2	0.87	1	6	1	novel_miR_1222
ENSPSIG00000006461	MSTRG.250853.1	0.95	1	1	1	novel_miR_1222
ENSPSIG00000006461	MSTRG.84138.2	0.94	1	1	1	novel_miR_1222
[truncated: 16,843 more rows]
